# Supplementary material for: Multiomics analysis of a resistant European turnip ECD04 during clubroot infection reveals key hub genes underlying resistance mechanism
Source: Front Plant Sci. 2024 May 23;15:1396602. doi: 10.3389/fpls.2024.1396602 (PMC11153729; doi:10.3389/fpls.2024.1396602)
Supplement: Supplementary file 2 [file Table_2.xlsx]

## Sheet: Supplementary Table 2
Supplementary Table 2. Expression profiles and annotation of three time points’ DEGs.
Geneid	I181	I182	I183	I241	I242	I243	I301	I302	I303	M181	M182	M183	M241	M242	M243	M301	M302	M303	18dpi	24dpi	30dpi	GO	KEGG
BraA01g024020E	31.239	38.006	33.129	69.146	88.559	160.458	52.394	84.236	91.545	88.887	95.465	88.236	49.349	49.594	54.202	54.488	83.073	58.866	-1.38237	1.09203	0.298588	GO:0005506	K09755
BraA01g027728E	3.355	2.934	3.155	10.829	9.038	7.366	47.095	37.382	42.188	10.724	11.626	10.433	9.264	12.298	8.972	49.863	21.715	12.123	-1.76502	-0.145967	0.666357	GO:0016702	K09840
BraA03g009423E	16.694	18.522	18.462	24.049	10.741	20.685	0.647	4.612	6.842	4.461	4.474	5.51	4.969	4.18	6.134	1.253	3.536	2.67	1.92498	1.86765	0.78206	GO:0046983	/
BraA02g030143E	18.912	22.095	19.256	39.265	57.384	77.562	77.41	68.558	81.134	65.527	63.787	51.869	74.928	59.653	48.43	101.066	173.18	136.14	-1.5573	-0.0350024	-0.774868	GO:0010167	/
BraA08g041258E	3.787	3.789	3.248	4.346	16.475	18.724	12.037	5.211	6.391	18.498	16.544	12.55	20.976	24.278	18.578	7.152	12.495	15.901	-2.10492	-0.635	-0.513878	GO:0004601	K00430
BraA01g025181E	40.717	39.535	36.369	27.958	35.623	34.009	82.054	63.357	67.13	88.989	77.47	75.016	91.755	72.997	111.289	107.373	91.988	88.273	-1.0181	-1.46536	-0.361465	GO:0003677	K14486
BraA01g024301E	23.228	21.767	22.889	46.402	51.274	62.333	44.147	30.808	50.073	70.491	66.047	48.661	65.976	60.8	62.031	49.496	82.038	61.416	-1.41705	-0.208648	-0.551845	GO:0005216	/
BraA01g025850E	1.454	2.727	2.819	3.858	2.814	5.5	14.847	6.562	10.155	13.755	10.613	17.605	2.112	3.426	5.111	8.707	13.436	7.085	-2.55363	0.21902	0.182477	GO:0004497	/
BraA09g006811E	26.12	28.241	24.966	21.078	19.007	10.551	4.31	32.74	24.125	10.883	12.636	13.221	30.444	26.015	24.27	15.466	20.126	23.479	1.14128	-0.654825	0.144737	/	/
BraA09g000331E	20.972	24.794	15.468	59.1	91.178	35.073	18.298	195.98	186.285	6.101	4.987	6.802	23.132	12.558	15.584	27.629	17.667	15.968	1.80866	1.88897	2.79425	GO:0005524	/
BraA05g017051E	11.229	9.925	8.071	13.725	22.024	25.256	33.783	14.707	18.66	27.653	24.65	23.509	19.449	19.37	19.589	19.139	24.816	24.544	-1.34259	0.102873	0.0436934	GO:0008483	K16871
BraA02g033119E	13.011	13.933	13.569	17.231	66.46	85.279	12.099	13.369	17.407	38.806	62.776	38.512	48.988	36.708	42.172	21.403	26.99	27.064	-1.76161	0.457937	-0.738039	GO:0004601	K00430
BraA07g036791E	7.754	10.938	8.108	44.219	27.087	55.062	49.902	39.785	76.23	27.788	22.505	35.262	5.742	8.343	5.379	48.215	55.667	45.769	-1.64231	2.71581	0.219892	GO:0000287	K01530
BraA08g037716E	5.47	7.076	6.46	13.921	9.847	15.981	31.18	14.106	20.461	14.871	17.361	17.796	9.687	8.406	8.417	22.123	29.829	20.53	-1.36628	0.603031	-0.0691254	GO:0003677	/
BraA01g027501E	57.259	72.925	77.005	48.195	40.697	17.156	19.169	36.505	21.014	23.983	31.749	28.991	30.425	37.915	35.079	29.711	33.785	34.216	1.31877	0.0520961	-0.259625	GO:0004478	K00789
BraA09g003888E	6.761	7.382	6.935	12.337	10.289	17.56	10.376	7.616	12.696	14.735	15.299	14.519	13.137	10.264	11.635	10.164	21.352	15.419	-1.04909	0.221688	-0.537555	GO:0004185	K16296
BraA05g017976E	23.956	22.357	34.268	37.746	21.657	41.112	37.979	29.174	37.208	67.801	91.154	75.559	29.983	37.402	31.803	48.034	83.031	73.628	-1.51336	0.0340535	-0.8945	GO:0003677	/
BraA03g010231E	51.174	42.329	42.543	128.255	165.847	209.868	244	187.531	221.666	102.556	83.704	104.25	120.037	137.775	87.922	135.642	233.383	214.286	-1.06182	0.577369	0.241299	GO:0005975	K01785
BraA10g048004E	12.469	11.265	13.059	15.828	22.047	19.413	135.882	64.52	48.659	27.443	43.185	44.788	29.835	23.018	25.034	54.558	38.821	45.113	-1.62008	-0.40917	0.919218	/	K07025
BraA04g043574E	18.557	22.95	18.652	16.825	49.038	51.479	53.478	21.445	15.946	45.553	41.193	39.128	50.885	37.242	44.017	28.296	36.222	38.452	-1.03375	-0.119009	-0.105821	/	/
BraA05g014040E	110.854	78.468	102.529	114.503	113.487	136.236	187.602	114.888	150.872	235.94	209.032	210.318	254.118	287.901	260.167	217.69	338.613	231.422	-1.13533	-1.11183	-0.72224	GO:0005506	K20660
BraA07g035008E	5.069	3.905	4.413	4.214	7.503	5.711	5.721	5.154	5.515	19.028	26.116	11.835	12.585	11.853	12.894	6.33	16.743	9.927	-2.06045	-1.05722	-0.927834	GO:0004672	/
BraA10g045009E	19.699	11.601	11.803	43.647	15.172	27.373	5.08	13.966	25.304	4.294	3.646	3.888	5.492	6.796	14.694	3.925	5.849	3.223	1.89935	1.67761	1.84721	GO:0004499	K11816
BraA07g036316E	15.451	13.76	15.157	23.079	19.159	39.519	8.217	8.787	16.9	27.063	25.895	26.05	39.247	29.962	25.744	18.369	38.456	26.966	-0.801335	-0.191826	-1.23006	/	K10664
BraA09g001318E	1.592	1.911	2.406	1.181	3.893	11.332	0	0.446	0.899	7.493	12.804	8.034	4.574	3.317	3.282	0.901	6.033	1.208	-2.23453	0.602485	-2.51605	/	/
BraA01g026909E	2.534	2.213	4.206	4.943	6.943	11.909	0.699	2.135	2.719	9.682	13.034	12.1	4.399	5.777	6.513	3.135	7.407	4.308	-1.932	0.551548	-1.335	GO:0004553	K05350
BraA05g015778E	16.409	12.057	11.629	14.416	24.181	16.948	29.39	18.234	22.218	43.423	60.566	33.604	29.259	36.118	33.942	18.526	30.705	24.44	-1.74862	-0.797235	-0.00094552	GO:0006855	/
BraA09g001388E	14.514	16.396	16.306	13.397	7.393	9.972	16.865	9.501	13.808	31.676	27.753	28.059	29.294	25.774	51.068	24.663	30.224	27.756	-0.858752	-1.77384	-0.967658	/	/
BraA05g014073E	13.835	14.609	13.047	3.769	5.833	3.824	5.986	5.285	3.661	4.887	6.756	4.537	4.621	5.552	5.442	4.412	3.799	3.346	1.38774	-0.180898	0.449411	/	/
BraA01g023968E	46.708	29.356	35.881	78.739	59.979	56.656	92.458	64.308	65.286	15.604	14.627	12.516	24.905	29.539	31.972	54.755	26.693	33.9	1.42088	1.19492	1.01642	/	/
BraA02g028524E	56.298	30.677	8.924	14.52	21.525	8.388	2.52	3.707	2.461	3.801	2.443	2.643	7.904	19.268	25.798	4.377	5.585	5.941	3.47085	-0.212078	-0.786689	GO:0000287	K01568
BraA04g044525E	8.097	9.337	7.653	11.669	9.238	11.23	0.456	5.069	5.048	3.39	2.013	3.179	3.541	2.806	4.845	0.852	3.172	3.176	1.58143	1.54321	0.647567	GO:0046983	/
BraA10g046122E	7.81	13.411	11.626	6.247	42.751	4.47	2.646	104.5	51.941	1.867	1.822	2.588	2.336	1.672	1.86	0.698	2.189	0.231	2.41881	3.26408	5.77975	/	/
BraA03g012730E	3.078	3.44	2.834	5.348	6.736	10.367	5.556	4.896	5.675	8.883	8.407	6.503	8.867	6.824	6.402	6.649	11.432	8.494	-1.31609	0.0561635	-0.641675	GO:0016021	K01534
BraA03g012564E	10.267	10.496	10.795	3.63	2.686	2.093	3.067	5.889	2.494	4.101	4.822	3.34	6.859	5.116	7.833	5.208	5.213	4.275	1.39278	-1.21867	-0.269513	/	/
BraA03g009988E	9.075	9.201	7.394	14.687	17.001	19.475	14.483	13.682	17.792	18.234	16.061	18.839	18.861	16.413	15.915	18.575	32.902	24.861	-1.01703	0.0293951	-0.653831	GO:0003700	/
BraA01g025146E	21.069	31.68	23.948	8.286	10.272	4.625	11.775	17.521	9.446	10.998	10.183	11.432	21.587	28.314	16.861	27.542	5.98	13.969	1.26494	-1.49733	-0.213497	GO:0009058	K00815
BraA03g012140E	112.126	145.792	109.078	41.25	31.916	17.2	25.697	47.78	40.939	62.993	65.083	55.782	139.549	114.818	154.687	49.603	60.604	63.973	1.02814	-2.16461	-0.520742	GO:0003824	K05907
BraA02g029580E	4.952	5.621	6.812	12.228	9.216	10.265	116.319	14.995	24.492	22.311	14.416	19.701	23.954	14.148	11.967	21.009	14.873	16.585	-1.66688	-0.644476	1.63114	GO:0006869	/
BraA08g041244E	6.513	5.747	4.239	5.44	13.188	11.53	16.485	6.497	7.322	22.723	14.263	16.044	17.271	15.627	21.746	7.713	10.237	8.006	-1.64992	-0.807025	0.295799	GO:0008152	/
BraA09g001872E	43.728	38.663	26.418	21.862	95.036	36	24.644	175.749	119.878	11.959	7.643	12.954	23.527	15.122	13.692	28.78	9.296	22.076	1.77613	1.60856	2.50145	GO:0004568	K01183
BraA05g014505E	23.599	8.782	14.722	5.9	5.261	11.775	0.053	0.488	0.328	2.999	1.059	2.397	4.088	3.386	2.626	0.309	0.561	0.255	2.90465	1.2095	-0.283843	/	K14496
BraA03g009772E	31.821	38.188	53.991	70.942	81.305	142.334	53.261	47.103	77.747	94.537	131.022	124.251	103.017	69.881	59.898	119.218	208.357	154.466	-1.46886	0.3703	-1.361	GO:0010167	/
BraA03g009000E	41.602	30.224	41.842	10.274	15.563	18.59	13.649	8.734	11.621	16.046	12.655	17.894	19.068	22.221	18.976	10.757	6.809	10.595	1.31865	-0.402103	0.343923	/	/
BraA06g020653E	5.488	5.218	3.107	11.096	6.607	14.195	6.644	8.855	14.592	14.349	28.657	17.666	9.635	15.148	10.267	14.759	22.818	21.451	-2.10514	-0.118319	-0.89557	GO:0003712	K00517
BraA06g023617E	14.19	14.162	18.937	18.699	49.123	61.268	25.288	19.978	18.933	33.364	46.043	34.85	39.258	26.047	21.395	20.207	37.858	28.017	-1.2447	0.621849	-0.342711	GO:0016491	/
BraA01g026873E	21.712	20.181	33.993	59.712	39.615	72.672	24.362	20.665	46.388	70.69	60.924	65.159	33.977	45.405	33.611	31.419	74.194	56.597	-1.34535	0.624723	-0.753938	GO:0004672	/
BraA09g006881E	9.248	9.409	9.369	24.942	19.939	47.57	23.85	17.981	32.95	19.86	17.448	26.327	12.269	14.671	8.725	23.971	46.952	28.935	-1.1511	1.39935	-0.343151	GO:0003700	K14431
BraA01g025001E	93.288	109.068	86.67	36.411	28.869	30.671	25.353	42.38	37.61	55.909	58.62	57.316	106.984	89.035	104.143	41.822	53.337	57.473	0.781298	-1.62625	-0.450259	GO:0003824	K05907
BraA10g047751E	5.841	4.407	7.233	9.106	12.167	19.413	24.171	7.913	13.953	14.212	14.788	13.765	10.825	11.034	7.811	13.323	23.805	16.953	-1.2612	0.490643	-0.162229	GO:0005515	/
BraA07g034884E	7.849	8.252	5.567	14.575	11.014	18.676	8.262	6.557	11.782	17.48	25.107	20.932	24.158	19.94	20.686	18.308	44.964	25.835	-1.52093	-0.528702	-1.66827	GO:0005737	/
BraA07g037601E	3.227	2.182	3.892	8.271	12.779	11.824	6.705	9.78	13.758	13.333	13.849	8.118	19.585	10.897	14.051	9.664	9.614	11.333	-1.89527	-0.401785	0.0592008	/	/
BraA01g024865E	10.305	7.725	10.757	11.711	23.6	26.853	16.042	13.389	16.036	21.861	25.668	19.079	21.134	17.898	14.685	15.949	34.348	22.16	-1.18075	0.254378	-0.593014	GO:0005509	/
BraA10g044872E	2.65	4.261	2.034	1.499	6.525	2.812	2.148	16.263	9.518	0.316	0.647	0.287	0.601	1.261	0.787	1.701	0.998	0.999	2.86674	2.09766	3.0099	GO:0009055	/
BraA04g044743E	56.812	36.792	44.083	38.229	58.455	33.703	11.813	33.824	35.8	22.338	19.648	22.132	25.804	27.873	30.516	25.703	16.697	21.66	1.13513	0.669634	0.42746	GO:0004857	K01051
BraA06g022581E	3.946	3.246	4.681	4.362	6.8	4.434	8.103	9.561	9.328	20.528	19.808	8.969	13.858	8.615	13.24	14.099	10.644	16.859	-2.02474	-1.15849	-0.545153	GO:0005506	K20661
BraA07g036453E	2.109	2.412	2.856	7.644	4.646	8.546	7.375	4.802	10.147	4.882	5.605	4.976	2.539	3.017	2.459	6.59	8.299	6.56	-1.0386	1.39429	0.127676	GO:0000287	K01530
BraA01g027051E	33.111	34.887	28.579	24.524	30.118	18.442	6.624	9.185	7.528	18.844	14.611	12.578	13.563	10.19	14.606	7.792	10.142	9.426	1.10148	0.960995	-0.145682	GO:0000155	K14509
BraA08g038729E	5.476	5.774	6.809	10.774	14.122	21.321	1.934	5.748	6.057	17.04	17.827	11.849	18.787	12.333	14.563	9.751	24.138	16.549	-1.34195	0.051014	-1.78885	GO:0015267	K09874
BraA09g000992E	72.934	80.834	75.561	30.566	26.579	11.732	20.934	42.119	31.997	38.838	49.344	45.507	54.091	55.963	62.87	42.351	32.703	39.614	0.808445	-1.31054	-0.185737	/	K00860
BraA08g039200E	9.672	7.779	9.938	10.591	4.19	7.926	4.077	3.339	8.332	17.534	17.919	22.731	11.625	13.4	16.055	7.217	10.704	13.641	-1.05604	-0.85064	-0.932291	/	/
BraA03g009235E	454.274	248.087	280.989	111.902	173.863	123.145	73.623	128.087	100.699	101.608	129.871	131.385	247.214	233.336	238.113	86.01	97.528	94.566	1.47044	-0.775089	0.206565	GO:0005506	K00487
BraA10g046081E	388.045	185.646	145.773	70.291	131.647	94.008	59.322	37.254	36.838	65.437	45.266	66.917	221.924	184.712	171.63	34.834	31.081	21.96	2.05493	-0.923815	0.676109	GO:0000287	K01568
BraA04g043316E	0.38	0.546	0.837	1.608	1.257	2.386	0	0.149	0.955	2.994	2.875	1.988	0.928	0.462	0.379	0.118	1.455	0.611	-2.12834	1.58952	-0.915641	GO:0004970	K05387
BraA02g029958E	78.994	60.915	79.477	21.839	17.603	11.513	11.672	26.021	15.458	38.206	22.602	29.582	34.222	38.045	46.981	18.071	21.757	19.542	1.3122	-1.20807	-0.0695213	/	/
BraA07g034779E	15.128	13.62	26.84	25.152	35.788	70.729	15.779	8.116	25.44	50.908	91.109	62.337	22.066	35.994	14.919	25.588	89.054	51.395	-1.85291	0.888842	-1.68022	GO:0006952	/
BraA06g022002E	39.802	44.433	45.691	71.55	32.023	70.996	36.946	33.736	57.354	72.733	70.184	85.699	82.282	76.194	72.136	77.434	107.13	93.24	-0.784352	-0.393772	-1.04339	/	/
BraA07g035996E	3.571	2.357	3.849	6.751	4.692	4.33	0.405	5.51	6.802	16.23	10.775	8.251	12.917	16.719	16.807	5.311	27.423	23.248	-1.81877	-1.54156	-2.04735	GO:0016020	/
BraA06g019020E	6.9	7.628	7.264	13.533	17.773	23.816	2.822	8.526	10.702	17.841	21.39	12.818	20.225	13.969	14.692	8.377	20.051	13.266	-1.22664	0.207077	-0.833945	GO:0004672	/
BraA08g041259E	1.614	1.615	1.133	1.681	4.534	8.871	0.656	1.746	2.174	4.016	5.684	5.676	3.774	4.26	3.512	1.269	3.143	3.63	-1.78656	0.434472	-0.729744	GO:0004601	K00430
BraA05g018715E	0.276	0.276	0.676	1.317	2.533	2.577	1.506	1.864	3.175	2.805	3.084	2.031	4.509	2.143	1.85	2.088	4.525	3.163	-2.66226	-0.366138	-0.501949	/	/
BraA05g015394E	9.088	11.042	7.637	10.084	16.348	11.762	10.838	16.054	14.357	19.839	21.95	18.565	23.145	21.075	26.393	16.683	25.634	24.126	-1.08895	-0.847088	-0.603481	/	K08081
BraA10g048036E	4.501	5.886	5.249	8.242	7.763	14.253	13.273	6.511	10.466	11.711	9.866	10.552	12.823	9.769	9.367	11.711	18.919	14.485	-1.00761	-0.052135	-0.504078	/	K01988
BraA05g014290E	74.294	51.324	83.527	52.51	46.434	54.483	0.858	11.63	14.402	35.043	21.673	25.383	32.075	29.385	40.746	5.081	13.253	11.292	1.3811	0.610789	-0.0513162	GO:0046983	/
BraA03g010272E	63.871	39.454	53.251	36.094	34.49	27.657	20.818	23.764	18.431	23.538	10.955	13.284	26.845	21.674	27.226	13.293	6.278	5.423	1.74711	0.398556	1.41091	/	/
BraA09g002579E	4.188	4.159	5.951	5.309	12.832	10.01	7.287	5.545	6.914	16.648	18.498	9.715	17.728	14.699	16.614	9.516	20.051	14.196	-1.62159	-0.751823	-1.06979	GO:0003700	/
BraA07g036435E	2.442	2.126	2.551	3.109	3.179	2.672	38.907	6.218	6.27	7.516	5.741	5.567	3.671	4.263	4.284	16.793	8.985	9.173	-1.37123	-0.421827	0.61722	GO:0007165	/
BraA06g019197E	7.627	6.404	6.807	6.552	6.28	5.037	4.403	10.328	9.159	3.363	2.393	3.31	3.406	4.859	6.621	6.114	4.14	5.552	1.23403	0.290208	0.678842	/	/
BraA02g031449E	1.554	1.069	0.685	0.123	0.989	0.126	0.025	0.178	0.103	0.146	0.095	0.122	1.922	2.413	3.486	0.097	0.096	0.168	3.22322	-2.58236	-0.148483	GO:0004252	/
BraA05g015386E	20.258	18.389	14.21	12.213	12.993	6.143	13.003	18.272	11.117	7.211	8.647	6.436	6.316	12.3	10.101	13.032	9.567	6.83	1.27649	0.153305	0.609818	/	K13993
BraA10g045064E	53.35	64.777	40.016	19.517	12.642	7.475	14.99	26.442	18.41	26.707	16.522	16.483	46.13	38.633	58.071	18.105	16.145	17.999	1.43928	-1.84053	0.281349	GO:0005515	/
BraA09g004776E	15.843	8.905	7.9	22.768	36.004	19.935	34.163	65.187	34.377	3.183	2.38	3.583	8.443	18.242	15.377	29.091	3.981	7.393	1.87138	0.945149	1.80378	/	K09422
BraA09g004025E	20.141	21.741	31.865	52.483	42.939	53.908	42.054	50.529	61.459	47.606	68.576	82.906	23.929	27.728	19.983	65.359	78.573	93.143	-1.40486	1.08039	-0.543164	GO:0016491	/
BraA02g028972E	0.86	1.18	1.807	0.472	10.387	0.229	0.507	9.543	5.851	0.246	0.072	0.149	0.64	0.277	0.196	0.368	0.559	0.462	3.07619	3.40446	3.61668	GO:0003700	K14487
BraA09g006328E	151.295	40.571	60.94	37.827	118.655	72.459	22.327	42.57	43.645	14.628	12.336	21.496	31.473	25.883	25.057	20.855	14.982	12.633	2.41947	1.52932	1.24261	/	/
BraA06g018888E	5.631	8.422	5.954	7.385	16.699	16.932	14.495	9.657	8.439	20.096	17.915	13.616	10.449	13.139	10.009	15.807	15.321	19.696	-1.33644	0.335142	-0.563864	GO:0005515	/
BraA03g011883E	392.932	165.374	228.929	102.121	153.352	140.662	47.426	52.346	54.257	96.296	79.256	91.292	196.971	160.353	172.713	46.737	64.021	56.508	1.59494	-0.382599	-0.0386184	GO:0016491	K00016
BraA05g017870E	64.651	43.118	40.473	27.76	32.47	26.416	14.986	22.733	20.556	22.695	14.967	22.016	33.115	32.33	34.016	18.06	11.203	12.847	1.34752	-0.169279	0.548188	GO:0005515	/
BraA03g010034E	109.122	65.555	111.628	127.798	30.349	5.001	20.083	25.206	25.77	19.997	39.725	34.819	13.269	28.627	28.2	41.051	42.646	43.414	1.62657	1.18558	-0.7594	GO:0004553	K08235
BraA03g011852E	264.526	119.107	291.013	50.593	80.999	140.013	517.619	36.689	66.935	78.663	76.272	67.688	83.934	60.632	51.609	140.207	96.129	47.183	1.62944	0.508042	1.18815	GO:0005576	/
BraA06g022513E	0.373	0.402	0.244	1.151	0.352	0.522	1.358	0.725	0.771	0.878	1.413	1.94	0.281	0.411	0.186	1.286	2.187	0.563	-2.02179	1.19661	-0.424731	GO:0004506	K00511
BraA02g032390E	3.63	4.459	3.817	3.38	0.649	0.759	0.723	0.936	0.809	1.052	1.773	1.51	0.83	2.447	2.667	1.43	2.077	1.229	1.48643	-0.333994	-0.859546	GO:0004672	K04733
BraA02g029579E	4.887	6.454	6.499	11.167	13.044	9.725	230.51	14.57	26.691	32.882	13.174	21.898	23.705	13.22	13.062	29.955	16.618	18.087	-1.89576	-0.532882	2.1278	GO:0006869	/
BraA06g018909E	9.249	7.662	16.684	17.124	17.901	28.217	5.605	10.618	13.826	47.312	78.866	26.862	26.473	22.713	24.644	12.55	52.794	29.114	-2.16332	-0.193338	-1.56702	GO:0003676	/
BraA09g004892E	2.643	1.811	1.698	2.293	6.169	7.915	3.757	1.9	1.696	5.98	5.304	4.431	5.359	5.416	5.354	2.472	5.554	4.88	-1.32023	0.0725815	-0.733026	GO:0004190	/
BraA09g002018E	4.958	4.486	6.243	4.617	1.146	1.301	0.606	1.678	1.657	2.106	2.835	2.419	1.079	2.657	2.83	1.693	1.822	1.291	1.12009	0.0892002	-0.20324	GO:0005515	/
BraA06g020624E	1.245	1.494	2.634	1.636	2.705	3.355	19.263	0.653	0.395	5.11	6.727	6.532	5.489	5.485	1.407	3.107	4.758	4.681	-1.7467	-0.650967	0.757021	GO:0016021	K15382
BraA03g008171E	451.891	217.537	157.974	91.884	183.248	112.03	70.478	52.36	39.135	70.752	72.406	90.475	212.392	165.562	151.681	60.82	54.169	50.167	1.85993	-0.40818	0.049639	GO:0005985	K00695
BraA03g011858E	18.992	12.569	12.624	4.694	7.243	5.787	0.837	7.736	5.566	5.591	7.07	6.683	8.264	7.75	11.137	4.278	2.631	4.69	1.22333	-0.576615	0.377026	GO:0003333	/
BraA04g044295E	138.178	59.923	30.929	9.725	32.588	23.32	162.611	5.499	5.408	13.456	8.639	18.286	27.927	23.405	16.401	11.359	15.407	20.735	2.54285	0.00875704	1.9305	GO:0016020	/
BraA05g014365E	8.052	5.464	8.622	9.45	19.158	32.446	1.452	6.324	6.376	15.39	21.116	28.069	21.949	15.807	16.621	6.857	13.635	12.982	-1.51467	0.211006	-1.15352	/	/
BraA01g024712E	10.705	8.255	7.175	7.245	13.98	8.934	2.934	9.345	7.975	4.348	4.135	4.317	4.374	4.494	5.024	3.49	2.726	2.793	1.06264	1.16326	1.25423	GO:0004672	K04733
BraA05g018205E	118.802	59.77	55.645	25.31	31.767	19.308	3.979	2.941	3.581	22.915	6.787	19.351	42.955	32.696	50.004	3.669	3.381	3.132	2.2942	-0.685911	0.119747	/	/
BraA07g035134E	5.701	7.294	5.158	8.47	11.34	15.396	13.324	6.921	7.717	11.883	11.97	13.425	7.89	8.504	8.664	11.073	12.843	12.396	-1.00632	0.526516	-0.302821	GO:0016020	/
BraA01g024553E	34.221	35.736	32.721	19.09	13.058	8.525	10.219	10.587	10.325	14.967	21.988	14.904	14.379	19.777	25.297	11.027	15.34	17.763	1.01459	-0.534722	-0.422499	GO:0016491	K12259
BraA01g023851E	32.579	16.542	26.966	37.657	22.098	24.603	58.013	38.323	64.111	82.776	60.839	62.203	62.837	32.71	61.063	84.491	62.707	94.689	-1.40295	-0.883392	-0.521988	/	/
BraA09g002526E	1.428	1.922	1.935	3.038	5.72	5.718	3.913	9.979	12.824	6.362	7.168	4.076	1.58	1.716	1.228	1.918	6.573	2.876	-1.70732	1.71975	1.31826	/	/
BraA03g011190E	56.391	69.682	79.018	99.081	29.553	73.459	43.993	22.829	59.369	112.436	139.095	129.74	85.361	75.961	73.161	76.448	187.947	119.079	-0.865845	-0.218696	-1.53294	/	/
BraA06g019624E	37.487	18.934	31.129	144.203	95.125	238.207	179.604	187.804	279.496	75.535	69.495	119.082	27.245	25.017	20.752	154.536	202.996	162.655	-1.56054	2.73	0.390246	/	/
BraA01g025566E	12.802	8.483	13.143	17.477	10.3	22.395	13.879	10.956	16.224	24.165	24.846	26.578	16.751	14.453	12.686	19.128	27.806	21.946	-1.10404	0.208763	-0.671107	/	/
BraA02g032827E	106.246	83.474	76.544	45.263	52.672	52.171	39.136	30.777	26.138	51.767	35.819	43.587	77.511	64.604	74.097	28.849	34.175	33.692	1.05529	-0.496556	0.069235	/	/
BraA09g001628E	13.39	11.245	19.584	24.568	22.161	48.006	39.631	18.046	26.978	30.85	35.712	32.997	12.69	23.543	15.925	21.386	35.784	22.41	-1.14258	0.891053	0.161598	GO:0016021	/
BraA04g043221E	23.073	30.452	20.314	21.89	26.599	45.348	10.001	22.93	22.025	45.036	53.02	53.806	32.384	35.89	33.58	29.87	36.094	33.319	-1.00917	-0.0834658	-0.768759	/	K08233
BraA05g014375E	1.148	1.231	0.95	0.166	0.334	0.765	0.085	1.55	1.866	3.12	3.004	3.973	1.603	1.429	1.636	1.637	1.702	1.136	-1.56826	-1.84781	-0.271645	GO:0004553	K01188
BraA06g023111E	41.699	23.505	19.671	11.31	15.97	9.89	2.316	3.325	1.994	9.353	3.485	8.133	23.144	18.445	28.91	2.401	1.942	2.38	2.05504	-0.887364	0.267672	/	/
BraA04g044311E	174.188	109.816	144.716	59.527	105.606	83.092	49.565	67.487	55.979	82.103	68.715	67.099	126.33	102.377	109.841	52.554	53.327	52.136	1.0085	-0.405967	0.213513	GO:0009058	K00966
BraA07g036530E	361.763	132.758	170.964	25.587	70.016	44.604	5.964	12.137	6.934	52.349	16.311	56.783	145.478	128.994	125.171	2.437	20.19	1.653	2.446	-1.45913	0.142872	/	/
BraA07g034452E	4.705	3.336	3.295	2.053	3.233	3.089	0.233	3.349	3.649	0.952	1.636	1.593	2.212	1.007	1.189	1.013	0.876	1.355	1.46939	0.961131	1.24232	GO:0004672	K04733
BraA02g030244E	3.869	2.783	6.876	16.922	6.289	32.035	6.727	7.895	23.097	10.316	24.031	28.165	6.056	5.835	4.335	21.177	36.353	12.217	-2.18255	1.78238	-0.817924	GO:0016787	/
BraA09g001408E	5.1	4.492	3.821	6.567	4.574	6.371	30.265	6.864	11.212	11.828	11.027	26.747	17.737	16.214	20.868	29.069	40.418	20.878	-1.8532	-1.62727	-0.835736	/	K11153
BraA01g024583E	8.763	8.991	6.338	4.998	5.837	4.774	4.056	4.914	3.884	4.199	3.474	3.401	3.715	5.985	6.797	5.308	4.22	3.928	1.1542	-0.0477651	0.0141858	/	/
BraA03g010718E	9.193	11.43	13.759	14.473	9.454	17.059	11.244	10.109	14.409	21.081	28.088	22.927	13.292	16.147	13.621	15.032	27.173	21.918	-1.04032	-0.0529329	-0.765163	GO:0003677	/
BraA07g035988E	10.826	12.893	9.059	5.444	3.618	5.343	2.777	4.149	2.607	4.53	5.482	5.26	4.535	7.336	8.797	2.916	3.34	5.214	1.13283	-0.500777	-0.180834	/	/
BraA09g001914E	2	2.317	2.121	3.023	3.281	3.622	3.214	2.21	3.543	4.469	4.935	3.76	5	4.4	4.199	4.855	5.681	4.083	-1.00203	-0.427358	-0.632296	GO:0004672	/
BraA01g026005E	3.13	2.04	1.453	2.702	8.777	8.711	8.779	3.655	2.643	8.239	7.384	5.501	6.943	6.81	5.822	4.844	10.289	6.577	-1.63948	0.0981143	-0.448672	GO:0008152	K12356
BraA02g030097E	81.413	48.38	41.637	9.168	11.413	9.534	1.559	5.208	4.381	11.48	3.754	18.467	31.278	23.766	26.179	3.148	3.767	4.486	2.38472	-1.40104	0.0555508	GO:0003824	K01087
BraA09g006900E	7.403	8.438	7.277	5.58	3.565	1.116	2.314	6.264	3.514	3.279	4.426	3.26	4.361	5.93	4.251	6.987	3.991	4.795	1.10534	-0.499202	-0.295521	GO:0004672	K04371
BraA03g009445E	18.996	18.652	41.63	7.269	20.066	6.179	14.772	72.642	29.569	3.511	9.362	5.721	9.665	5.989	4.139	7.526	8.03	9.774	2.11473	0.810157	2.30793	GO:0004568	K01183
BraA08g040058E	15.666	11.813	15.878	62.97	21.974	52.016	16.456	31.139	56.242	26.125	30.274	43.15	20.28	21.271	14.436	44.49	37.371	65.116	-1.16839	1.29011	-0.427014	GO:0003824	K01087
BraA09g000569E	13.957	7.124	2.487	7.44	74.959	30.111	71.353	29.7	23.916	58.082	58.789	27.115	51.428	46.354	55.439	19.145	35.991	20.528	-2.57475	-0.368562	0.79977	/	/
BraA05g015559E	3.809	2.986	3.422	5.464	7.708	7.682	11.841	6.213	9.043	9.173	12.215	6.7	18.208	11.075	7.443	12.999	21.215	12.784	-1.42981	-0.785359	-0.720774	/	/
BraA03g008719E	3.348	1.368	3.563	0.715	0.24	1.222	0	0	0.1	0.094	0.184	0.571	0.284	0.435	0.517	0.047	0.326	0.233	3.3179	0.833735	-2.54241	/	K14496
BraA08g038810E	8.477	5.02	13.48	9.954	3.756	0.709	1.608	4.908	5.391	2.969	2.562	2.532	3.809	2.882	4.397	3.908	3.194	3.611	1.77109	0.360103	0.233839	GO:0008430	K17285
BraA03g010518E	3.211	3.007	3.567	3.663	5.662	3.03	5.776	5.013	6.013	12.325	10.535	5.816	7.963	7.002	9.238	3.863	5.941	5.418	-1.52085	-0.933304	0.220238	GO:0003723	/
BraA04g042812E	0.428	0.325	0.224	0.743	0.348	0.266	26.444	1.077	0.833	1.438	1.47	0.897	0.48	0.631	0.716	3.807	3.195	2.132	-1.93014	-0.423229	1.69197	/	/
BraA07g037403E	342.822	179.902	93.667	46.617	97.012	66.788	41.91	38.169	35.552	40.248	37.476	71.269	106.176	115.046	117.446	32.255	34.257	38.211	2.08573	-0.639316	0.221984	GO:0003872	K00895
BraA06g019923E	5.64	12.376	8.706	6.162	3.058	8.862	3.284	3.915	2.985	32.241	74.449	22.123	7.931	16.497	23.496	6.81	12.588	19.803	-2.24427	-1.38501	-1.8593	GO:0006952	/
BraA03g010148E	2.533	1.88	8.025	3.841	4.91	2.837	8.302	5.617	6.485	0.777	0.359	0.453	1.31	1.758	3.87	1.672	1.413	1.859	2.99574	0.776578	2.11983	GO:0015743	/
BraA03g011602E	22.986	12.606	18.22	37.986	39.284	23.944	26.962	66.077	40.381	6.133	6.894	8.772	9.471	23.551	20.713	39.193	9.054	15.24	1.33549	0.941482	1.15356	/	K09422
BraA09g000378E	29.446	29.501	30.763	16.848	5.155	1.492	6.075	5.816	7.572	8.648	16.957	14.131	6.295	10.548	6.439	8.448	14.574	8.633	1.20302	-0.0123981	-0.623864	GO:0016020	/
BraA01g024375E	13.078	4.84	5.309	9.687	19.326	7.199	8.303	18.656	13.943	2.014	1.31	2.03	3.697	11.289	5.494	9.469	2.084	2.465	2.1539	0.869102	1.62281	GO:0003700	/
BraA05g015680E	17.773	14.931	13.702	9.37	4.496	3.327	1.656	6.191	4.501	6.668	9.404	5.992	10.775	8.139	8.602	5.287	7.693	6.352	1.10246	-0.680837	-0.555611	GO:0016787	K06130
BraA03g013811E	0.321	0.911	0.405	1.327	1.146	1.222	1.907	1.181	1.871	3.057	2.982	1.703	2.282	1.372	2.271	2.754	5.746	2.677	-2.21093	-0.659822	-1.09718	GO:0016020	/
BraA07g034398E	10.712	7.409	7.927	4.747	4.749	2.124	2.319	6.386	5.354	3.012	2.938	4.838	4.705	4.675	4.088	3.333	4.281	2.519	1.30493	-0.191218	0.559122	GO:0016491	/
BraA10g046419E	1.118	0.728	0.924	0.416	0.414	0.251	0.103	0.199	0.212	0.412	0.139	0.176	0.333	0.351	0.531	0.111	0.188	0.125	1.96692	-0.143527	0.36352	/	/
BraA04g043054E	22.205	32.565	35.834	75.704	27.817	46.101	73.389	54.159	58.942	57.197	58.531	80.203	29.093	28.346	24.509	64.702	55.971	64.209	-1.0832	0.865168	0.0876001	GO:0003676	/
BraA07g035398E	18.905	9.151	15.7	9.523	75.792	38.204	0.14	9.104	4.088	6.106	4.831	5.47	10.933	5.207	4.595	1.15	2.21	2.883	1.44769	2.64185	1.20146	/	/
BraA02g029071E	7.128	5.323	6.903	14.16	20.302	27.938	11.548	15.044	24.784	10.454	12.281	12.867	11.545	8.718	7.91	16.185	20.542	13.983	-0.848881	1.18322	0.0937901	GO:0003700	/
BraA06g023415E	2.763	2.445	3.847	4.285	4.214	8.605	28.843	2.05	2.893	5.242	7.388	7.765	4.16	4.179	3.347	5.674	6.734	6.684	-1.14328	0.57901	0.885266	GO:0005215	K14445
BraA05g018094E	8.068	6.181	5.565	4.116	14.514	17.327	14.622	3.968	3.616	12.227	15.476	16.431	8.45	11.246	9.424	9.143	12.214	9.998	-1.12366	0.359601	-0.42675	/	/
BraA06g023103E	0.975	6.409	2.666	8.026	11.35	17.754	29.739	10.964	12.676	13.525	29.107	24.454	19.399	14.269	9.861	32.531	53.687	24.943	-2.71167	-0.196047	-0.985518	/	/
BraA09g006043E	2.21	2.717	3.89	4.146	3.472	4.057	4.175	5.087	5.073	6.958	7.62	5.885	4.643	4.202	4.966	5.529	7.212	6.297	-1.18679	-0.220528	-0.328943	GO:0003677	/
BraA03g008437E	19.725	16.328	53.62	74.294	94.621	240.139	139.286	29.503	59.346	88.847	109.164	149.173	16.217	26.449	10.159	79.639	177.855	118.049	-1.92768	2.98908	-0.650825	GO:0004553	/
BraA09g000111E	1.953	1.021	1.163	2.962	0.814	1.012	0.458	2.423	1.832	3.689	4.639	4.166	0.267	0.728	0.266	1.994	4.739	2.899	-1.56284	1.91416	-0.937962	GO:0005515	/
BraA01g026323E	2.641	2.411	4.722	2.47	1.849	2.121	1.839	1.94	1.642	1.025	0.387	0.933	0.86	1.522	0.856	5.635	3.23	3.397	2.09235	1.01209	-1.10057	GO:0016021	K02575
BraA07g033737E	1204.59	822.151	915.92	525.945	752.329	1041.42	32.108	103.704	127.602	594.533	360.415	500.518	1098	899.73	781.932	85.092	277.319	132.018	1.04982	-0.224571	-0.821321	GO:0019825	/
BraA04g042062E	46.297	41.236	48.896	35.879	62.847	41.193	67.529	84.932	64.947	27.221	32.739	27.162	25.769	34.794	31.198	48.722	33.189	32.684	0.676643	0.651381	1.00425	/	/
BraA01g027625E	8.156	8.075	5.647	4.534	5.368	3.079	4.337	8.679	6.051	2.778	3.942	3.507	9.072	5.169	4.64	9.792	6.926	10.4	1.12817	-0.515396	-0.422555	GO:0008271	K17471
BraA06g019488E	92.978	82.981	49.865	66.447	141.415	153.84	56.478	84.903	70.494	209.157	169.742	147.35	194.452	235.32	255.818	74.027	250.345	156.161	-1.18632	-0.873996	-1.09223	GO:0030145	/
BraA03g010531E	47.223	16.973	17.806	4.792	6.814	5.142	1.051	0.651	1.5	5.145	1.514	7.6	14.206	10.621	12.326	1.194	1.62	1.666	2.56355	-1.11627	-0.412936	/	/
BraA05g014986E	26.187	4.87	5.581	2.829	13.908	8.525	0.058	0.411	0.415	2.241	0.656	1.412	22.037	8.542	9.598	0	0.332	0.055	3.13055	-0.610691	1.28231	GO:0015267	K09874
BraA09g005008E	44.646	33.818	28.825	21.361	21.179	19.17	9.715	8.947	10.836	21.347	14.809	18.47	25.432	25.16	27.572	11.28	12.506	12.257	1.00823	-0.315524	-0.212515	GO:0005515	/
BraA03g012383E	1.776	1.535	1.635	1.042	2.412	0.864	0.339	4.925	2.39	0.746	0.6	0.708	0.725	0.651	0.656	1.16	0.433	1.041	1.30024	1.13461	1.63559	GO:0004601	K13447
BraA02g029190E	17.837	26.406	18.05	7.44	6.356	1.907	1.485	6.213	2.54	7.848	11.483	7.91	9.539	10.49	11.008	7.905	5.06	7.519	1.22228	-0.966917	-0.905823	GO:0030001	/
BraA09g002257E	78.655	46.067	31.138	25.534	19.392	17.45	8.36	10.947	14.628	21.134	10.553	17.434	40.67	39.522	51.5	12.292	11.178	15.106	1.70354	-1.05995	-0.10831	/	/
BraA09g004847E	79.335	45.445	79.352	30.674	32.229	36.152	11.13	9.281	14.767	34.193	15.449	24.804	47.069	39.147	41.582	11.175	14.914	14.047	1.48909	-0.340468	-0.115709	/	/
BraA02g032711E	0.356	0.259	0.604	0.655	0.148	0.252	0.067	0.238	0.291	0.973	2.42	2.026	0.649	0.73	1.066	0.566	0.48	0.785	-2.12722	-1.22054	-1.54048	GO:0003899	K14721
BraA09g006342E	1.487	1.623	1.144	2.624	4.821	3.699	2.176	3.463	3.663	2.897	3.486	3.247	4.227	3.519	2.535	3.023	5.372	4.067	-1.14741	0.155834	-0.3393	GO:0004672	K04733
BraA01g027326E	33.674	24.253	28.571	48.987	74.701	54.666	52.742	105.117	70.198	15.783	17.526	18.358	16.009	24.876	21.932	49.139	18.364	19.15	0.77468	1.54513	1.4774	/	/
BraA03g012299E	170.914	138.283	144.921	152.433	131	160.321	218.497	188.94	271.908	256.299	223.604	223.254	320.682	280.234	314.854	342.051	386.112	316.007	-0.598658	-1.02245	-0.545905	GO:0003677	/
BraA09g006810E	10.849	15.24	8.238	5.168	6.047	4.033	1.769	9.38	6.038	4.589	4.766	5.79	8.559	9.156	11.115	8.229	6.16	7.374	1.21303	-0.88923	-0.248931	/	/
BraA07g033746E	161.21	71.48	102.679	70.569	43.553	87.152	33.748	7.562	24.624	42.214	26.414	50.176	57.757	53.243	50.646	17.095	38.407	25.126	1.53226	0.333084	-0.223681	/	/
BraA03g012034E	1.847	1.169	0.985	0.742	0.194	0	0.196	1.454	0.374	0.299	0.371	0.329	0.054	0.334	0.163	0.054	0.537	0.188	2.03317	0.735438	1.49007	GO:0004672	/
BraA06g020408E	17.424	14.055	19.501	44.383	27.188	59.646	23.023	25.713	59.837	27.642	28.013	27.18	20.843	24.799	17.408	23.151	33.446	39.007	-0.670143	1.07473	0.255324	GO:0016020	/
BraA02g032815E	112.915	90.363	60.408	49.346	60.565	52.478	27.333	30.059	28.936	48.67	34.125	40.632	55.879	52.684	59.683	31.723	31.664	34.128	1.13026	-0.0187841	-0.0962609	GO:0000166	K01885
BraA08g037781E	56.378	57.602	34.733	20.429	25.334	15.963	22.01	21.952	16.525	21.291	26.634	24.597	30.798	44.373	32.904	25.389	20.322	20.833	1.06814	-0.777082	-0.0579239	/	/
BraA04g041474E	0.686	1.815	1.729	1.289	2.397	2.541	3.034	1.492	1.92	5.154	5.41	4.007	4.962	3.968	5.378	3.328	6.494	5.821	-1.75664	-1.16146	-1.20243	GO:0030247	/
BraA03g012942E	2.446	1.468	2.378	2.666	2.231	0.727	1.404	3.304	1.778	0.213	0.748	0.558	0.725	1.852	2.142	2.293	0.441	0.442	2.07692	0.272327	1.11122	GO:0003700	K09286
BraA01g027528E	7.333	4.981	6.804	14.126	17.103	9.12	30.259	44.686	28.389	2.782	3.392	3.038	3.21	6.604	5.735	23.501	3.357	5.576	1.08331	1.40788	1.7467	/	/
BraA07g036476E	15.059	12.539	42.309	7.66	5.241	1.939	2.123	6.284	4.356	4.682	6.486	5.947	6.468	7.379	9.515	9.897	1.109	7.96	2.05429	-0.644395	-0.488837	GO:0016491	/
BraA01g027566E	0.872	1.226	0.523	0.596	0.192	0.22	0.17	0.297	0.2	0.094	0.184	0.167	0.402	0.145	0.188	0.259	0.326	0.233	2.5885	0.446324	-0.2121	/	/
BraA10g047359E	5.587	5.323	4.342	6.025	3.686	1.82	2.415	5.195	3.323	1.225	2.494	1.826	0.64	6.052	2.229	3.878	3.103	1.948	1.48832	0.377299	0.377692	GO:0003700	K09286
BraA06g023561E	2.277	3.084	4.129	11.085	33.58	32.893	20.562	31.88	29.808	5.717	12.042	10.181	6.003	5.168	5.1	31.541	15.547	11.577	-1.53208	2.30608	0.56412	GO:0005506	K09843
BraA08g039357E	0.87	1.039	1.103	1.22	2.63	2.414	1.969	2.592	2.02	2.248	4.248	2.521	2.278	1.61	1.427	2.017	4.106	2.694	-1.55539	0.279354	-0.336607	GO:0004672	/
BraA02g033211E	35.56	32.391	47.363	54.997	86.712	96.952	40.018	39.705	54.365	67	102.223	68.071	42.702	52.187	37.215	45.737	82.224	70.803	-1.01379	0.892631	-0.489634	GO:0004612	K01610
BraA07g037320E	0.157	0.216	0.197	0.455	0.539	0.69	0.02	0.062	0.083	0.922	2.468	0.573	0.922	0.923	0.898	0.196	0.832	0.581	-2.77447	-0.676142	-3.20698	GO:0004930	K05387
BraA02g028772E	8.399	9.462	8.543	15.334	22.054	21.761	27.212	26.106	22.956	24.247	14.056	16.704	20.102	15.832	15.207	16.93	18.255	19.486	-1.02564	0.245011	0.560235	GO:0004553	K07407
BraA02g032915E	16.066	18.837	22.885	25.734	42.491	101.124	29.024	15.226	33.225	43.514	62.895	30.436	44.295	43.269	48.503	56.007	149.332	65.051	-1.2167	0.358858	-1.73085	GO:0016491	/
BraA03g007834E	147.565	72.737	92.207	77.005	67.409	66.887	10.454	15.343	13.443	52.458	23.624	38.925	69.635	72.296	71.719	12.959	13.248	10.351	1.47835	0.0061674	0.183893	GO:0016702	K10712
BraA05g016873E	2.271	1.704	2.252	1.973	10.194	4.303	24.709	11.547	6.347	4.796	4.782	3.832	4.232	5.781	3.857	9.457	6.699	5.021	-1.07642	0.314099	1.08133	GO:0009916	K17893
BraA09g005118E	1.542	1.602	1.972	2.439	2.518	2.848	1.795	2.615	3.285	3.919	4.788	2.873	4.517	2.633	3.746	2.921	4.28	4.187	-1.1504	-0.455629	-0.485834	GO:0004672	/
BraA03g009828E	107.57	90.206	76.217	133.168	263.576	170.55	133.052	325.665	159.368	53.336	50.452	61.897	61.369	116.475	106.059	128.358	38.164	55.954	0.758602	1.04677	1.56015	/	/
BraA02g028894E	47.993	55.946	40.953	23.368	19.252	9.582	8.182	13.701	9.353	13.159	28.902	19.3	9.946	38.726	25.129	16.15	18.456	15.965	1.26797	-0.481189	-0.609025	/	/
BraA08g040764E	5.154	3.287	5.842	10.423	14.768	20.768	6.58	5.478	11.047	9.289	11.893	14.564	12.268	22.577	8.353	8.425	24.328	17.788	-1.29385	0.125488	-1.05381	/	/
BraA09g000924E	5.221	2.348	4.255	6.702	7.172	13.133	22.695	5.789	13.784	8.164	13.751	13.38	6.408	5.77	3.569	12.767	8.06	6.676	-1.54802	0.807181	0.6812	GO:0003677	K09338
BraA03g010949E	5.202	5.538	9.856	5.501	2.334	1.039	5.613	4.809	3.132	2.724	2.797	2.504	3.013	3.667	4.284	4.24	2.736	3.258	1.38748	-0.312427	0.484239	GO:0004356	K01915
BraA08g039972E	6.982	4.268	6.476	8.348	7.056	6.777	1.944	7.387	3.108	1.997	2.056	2.908	1.666	3.634	2.984	2.932	0.602	1.535	1.38025	1.44436	1.38548	/	/
BraA01g025289E	2.172	2.173	2.821	4.1	5.016	5.353	5.677	4.713	4.751	4.978	5.28	4.92	5.563	4.155	4.766	4.241	8.78	4.395	-1.05325	0.0281225	-0.121556	GO:0004601	K13447
BraA02g033012E	1.304	2.566	1.567	2.848	1.842	2.702	5.552	3.973	4.806	4.463	4.805	4.838	3.287	3.188	3.481	5.121	8.438	6.907	-1.34464	-0.411924	-0.436691	GO:0005515	/
BraA03g007999E	235.221	143.35	91.105	60.157	124.058	89.087	63.08	56.298	45.269	66.632	51.827	66.589	118.481	112.171	110.772	49.479	53.115	54.853	1.37983	-0.274971	0.144624	GO:0008152	K00963
BraA09g007025E	0.249	0.299	0.1	0.302	2.234	1.136	2.005	0.942	0.527	1.697	1.85	0.956	2.697	1.787	1.441	1.493	1.133	2.219	-2.76281	-0.627179	-0.402532	GO:0004601	K00430
BraA03g010546E	1.56	0.958	0.993	1.522	4.684	2.269	0.734	1.092	0.985	6.549	5.319	2.044	4.855	5.3	8.216	1.257	4.247	2.681	-1.95374	-1.05801	-1.45551	GO:0003824	/
BraA01g028426E	187.982	68.065	97.954	94.422	95.236	58.374	30.364	28.981	31.914	54.612	25.088	31.786	82.86	68.58	85.332	27.081	12.387	12.306	1.70382	0.0909952	0.889736	/	/
BraA03g012161E	25.253	14.848	15.547	11.758	6.319	8.303	4.875	4.302	5.783	7.726	9.483	9.463	8.769	10.138	10.236	7.002	7.919	6.832	1.09326	-0.133713	-0.464548	/	/
BraA05g015972E	12.569	11.206	16	22.65	18.59	25.671	7.541	22.136	29.221	41.227	33.795	20.007	27.984	27.965	27.324	22.468	28.382	36.791	-1.22655	-0.293423	-0.491652	GO:0016788	/
BraA09g002468E	20.319	21.604	14.555	30.557	27.877	35.187	17.591	18.06	27.179	30.976	39.29	35.188	42.311	41.376	38.695	41.484	56.873	53.095	-0.869452	-0.362266	-1.19335	/	/
BraA07g034397E	8.172	7.934	12.884	25.357	14.979	27.577	18.902	13.459	34.512	17.298	18.084	20.39	7.222	8.868	5.15	16.026	31.421	21.363	-0.915277	1.69034	0.0293229	GO:0003883	K01937
BraA02g030799E	82.496	32.915	68.144	29.303	24.399	32.295	8.885	9.294	16.336	26.644	10.349	21.191	30.208	30.29	28.132	8.839	11.717	11.108	1.69276	-0.021433	0.198456	/	/
BraA08g040960E	107.664	58.78	57.407	31.529	44.961	39.244	13.852	12.986	13.058	38.388	18.141	30.094	60.043	43.824	56.524	15.037	12.296	17.334	1.40645	-0.434708	-0.0854489	GO:0004497	K05917
BraA03g011464E	11.279	15.937	14.487	5.488	5.601	1.973	8.145	7.547	4.924	5.928	8.33	4.908	7.629	5.345	7.311	10.696	7.734	7.464	1.14924	-0.613083	-0.249181	/	/
BraA08g039226E	9.96	6.336	9.271	11.532	13.91	13.177	17.14	16.549	16.249	15.9	24.228	15.447	12.166	13.285	10.802	16.448	17.512	11.967	-1.09137	0.121934	0.198934	GO:0015079	K03549
BraA03g012321E	10.745	0.76	0.328	0.219	0.276	0.056	0.112	0.114	0	0.109	0	0.164	0.816	0.278	0.325	0.108	0	0	5.4892	-1.33804	/	/	/
BraA08g041275E	66.323	29.317	17.384	10.575	10.95	6.794	9.845	12.801	11.172	10.424	11.392	11.722	18.113	20.989	20.141	13.376	9.433	12.067	1.78885	-1.03959	0.0353223	GO:0005515	/
BraA05g016813E	99.735	73.688	63.239	35.949	22.896	19.199	7.336	4.884	6.504	41.401	11.661	21.352	51.294	42.008	50.082	6.836	8.331	6.342	1.70694	-0.867493	-0.12489	/	/
BraA01g024808E	3.962	6.572	3.104	3.869	3.381	5.089	13.239	3.981	4.193	11.357	9.392	17.325	7.432	5.62	6.957	18.929	12.418	8.913	-1.44756	-0.673746	-0.844967	GO:0005506	K09843
BraA04g043706E	25.026	21.649	38.518	59.339	31.037	74.648	41.307	30.739	59.37	55.394	50.525	63.503	17.878	23.939	16.652	45.672	77.516	61.734	-0.962582	1.51117	-0.419879	GO:0005515	/
BraA06g021867E	0.115	0.161	0.07	0.186	0.258	0.597	0.119	0.145	0.195	0.762	0.72	0.488	0.67	0.567	0.437	0.276	0.843	0.684	-2.47623	-0.651683	-1.89338	GO:0004672	/
BraA10g046045E	2.594	1.825	3.507	6.109	3.359	7.598	4.817	2.108	5.119	5.212	5.672	5.979	4.026	5.093	3.071	5.213	10.456	7.32	-1.0601	0.499723	-0.862562	/	/
BraA04g043354E	15.629	10.529	8.404	6.578	6.068	7.357	3.848	4.492	5.187	5.501	4.109	6.317	8.635	10.073	9.112	3.998	5.288	4.292	1.15283	-0.450997	0.0736004	GO:0005515	/
BraA08g040551E	47.78	34.472	52.465	69.211	35.139	92.781	29.611	14.245	35.793	69.605	83.856	88.332	56.889	57.29	38.014	51.809	139.367	85.067	-0.814158	0.386233	-1.72316	/	/
BraA09g002162E	1.591	2.502	2.605	3.994	4.574	5.184	1.143	6.623	9.896	4.012	5.468	6.568	4.215	2.533	2.607	3.972	8.034	5.118	-1.23169	0.583439	0.127305	GO:0016020	/
BraA10g046339E	37.608	28.257	38.05	54.954	44.847	75.362	43.833	44.348	61.541	52.278	57.38	68.126	30.652	27.411	26.157	69.443	137.646	80.497	-0.744096	1.07961	-0.863331	GO:0005515	/
BraA06g023339E	6.54	5.977	6.263	10.176	34.983	17.517	27.402	74.665	36.715	9.673	9.383	9.261	7.525	10.147	8.803	19.558	10.215	8.522	-0.561415	1.30313	1.94669	GO:0003333	/
BraA07g037672E	4.828	3.339	6.876	12.265	15.394	22.921	11.284	9.761	20.946	10.415	11.149	11.52	10.992	14.597	6.807	15.412	21.33	22.916	-1.1082	0.675673	-0.434927	GO:0005975	K00864
BraA09g002529E	2.988	2.89	3.01	4.834	5.378	12.491	4.418	1.882	4.955	6.482	6.907	7.237	3.793	5.001	3.973	3.679	13.488	6.505	-1.18372	0.864128	-1.0002	/	/
BraA04g042895E	3.077	3.499	3.1	3.253	3.848	12.758	14.142	1.175	1.629	7.143	11.613	8.611	5.467	3.297	3.488	7.401	8.435	12.319	-1.47126	0.730574	-0.668203	GO:0004867	/
BraA09g007096E	131.291	41.565	41.292	19.979	33.711	23.879	6.187	6.612	6.439	18.92	8.68	24.992	46.61	40.228	42.684	6.288	6.099	7.514	2.06495	-0.699577	0.0300586	GO:0004109	K00228
BraA07g034170E	2.555	2.26	2.042	1.345	2.754	3.261	0.392	1.33	1.207	1.163	1.258	0.874	2.222	1.688	1.495	0.232	0.877	0.919	1.08813	0.48779	0.621247	GO:0005524	/
BraA05g014428E	22.134	13.116	11.149	26.584	28.221	23.379	13.308	30.782	26.56	6.916	6.403	6.473	9.89	15.601	18.7	15.34	7.037	10.602	1.26324	0.853127	1.18047	GO:0000079	/
BraA01g024937E	3.575	3.344	5.191	9.34	7.046	12.365	14.989	8.869	12.086	9.342	7.254	8.386	9.397	9.893	8.241	11.956	19.089	15.756	-1.01438	0.0839287	-0.305783	/	/
BraA03g010886E	8.6	4.818	4.505	5.043	4.03	2.406	19.96	1.264	3.459	2.325	1.764	1.475	2.93	1.057	1.715	2.661	2.635	1.191	1.7217	1.02193	1.98671	GO:0000160	K14490
BraA05g018248E	3.175	2.097	2.578	3.241	4.491	2.939	1.304	3.333	3.752	9.815	12.555	3.951	12.759	13.74	17.585	4.339	12.341	12.781	-1.71615	-2.01177	-1.72558	GO:0003824	/
BraA03g008641E	3.127	2.422	2.642	3.162	19.731	3.555	3.538	66.606	25.304	0.303	0.788	0.509	1.82	1.034	1.207	7.049	0.798	1.098	2.38233	2.77485	3.50838	GO:0030001	/
BraA09g005223E	65.965	53.647	49.407	71.089	105.388	75.107	88.982	146.381	99.416	38.552	35.846	37.751	35.605	55.587	47.23	77.422	32.447	35.621	0.62426	0.900525	1.28292	GO:0003700	/
BraA03g008646E	6.667	7.29	10.465	5.408	1.264	0.562	0.72	1.058	0.656	3.182	3.861	3.833	1.554	7.149	3.479	2.244	2.759	2.455	1.19524	-0.778083	-1.53266	/	K09422
BraA09g001990E	14.302	22.384	35.792	35.604	43.744	87.746	9.477	24.911	30.605	80.619	110.076	40.875	38.254	30.591	57.572	13.894	57.647	28.992	-1.65127	0.441189	-0.541955	GO:0016021	K08176
BraA09g000334E	22.36	19.989	27.672	65.897	66.167	70.484	16.893	49.702	77.674	14.841	14.648	16.071	16.536	19.703	21.026	31.719	18.414	23.191	0.650059	1.8505	1.05073	GO:0004252	/
BraA06g022885E	5.115	4.774	2.274	1.213	0.786	0.563	1.71	1.17	0.635	1.602	1.563	1.153	1.26	2.693	1.539	2.111	2.401	2.064	1.52752	-1.08697	-0.822834	GO:0005515	K01802
BraA03g011423E	1.421	1.469	2.052	2.155	1.834	4.762	1.759	0.994	1.253	3.225	9.113	5.067	4.082	3.009	3.023	2.695	6.601	3.093	-1.79171	-0.182701	-1.55066	/	/
BraA07g035148E	7.134	3.106	1.464	1.269	1.278	0.479	1.158	0.485	0.769	0.661	0.71	0.2	0	0.474	0.461	0.066	0.261	0.065	2.93121	1.72403	2.69277	/	/
BraA04g044617E	5.05	0.94	2.307	16.801	55.034	26.9	34.468	107.622	50.154	0.176	0.287	0.533	1.412	7.28	5.036	33.06	1.393	3.37	3.09324	2.90891	2.42564	GO:0003700	/
BraA06g022500E	0.144	0.092	0.081	0.285	3.254	1.545	1.247	3.341	1.809	0.432	0.332	0.261	0.484	0.354	0.275	1.241	0.58	0.308	-1.65909	2.26332	1.67346	GO:0003676	/
BraA09g000977E	69.197	80.498	37.355	72.913	112.132	238.029	28.915	52.714	67.488	153.996	140.806	124.868	344.207	279.107	255.537	131.212	247.098	207.207	-1.13212	-1.01526	-1.89112	GO:0005515	K00799
BraA05g018332E	3.951	2.92	4.161	5.266	7.181	7.911	5.095	4.854	7.08	10.384	9.691	5.89	8.009	7.039	8.463	4.258	9.231	8.264	-1.20482	-0.173528	-0.275094	/	/
BraA09g006009E	11.154	12.254	12.079	33.192	24.928	40.985	19.892	19.484	34.288	16.16	21.591	24.869	14.038	14.352	11.498	26.067	43.105	36.193	-0.789314	1.33334	-0.441456	GO:0005515	/
BraA01g027777E	18.598	19.142	28.986	24.871	21.861	62.441	12.729	11.013	13.564	30.538	74.519	76.277	14.337	15.188	12.999	24.595	35.864	27.743	-1.41615	1.39054	-1.16403	GO:0004553	/
BraA03g011702E	3.813	1.075	1.136	1.032	0.219	1.28	0.055	0	0.341	0.161	0.157	0.379	0.161	0.22	0.161	0.054	0.372	0.106	3.14856	2.22872	-0.363394	GO:0003700	K09419
BraA06g023592E	85.732	36.017	38.31	20.646	27.221	20.989	4.643	6.436	6.966	23.486	12.691	20.777	53.95	46.11	60.085	7.637	11.51	8.238	1.52779	-1.18404	-0.521142	/	/
BraA03g011901E	5.653	3.738	2.992	3.972	11.273	5.164	14.282	33.491	14.501	1.439	1.17	1.837	2.881	5.448	3.249	11.573	1.61	1.754	1.51319	0.872634	2.14171	GO:0005509	K06268
BraA10g046332E	6.419	9.004	9.824	24.676	9.252	27.914	6.467	8.459	19.456	13.196	18.461	30.212	3.695	9.977	6.32	16.047	29.201	21.042	-1.26402	1.63882	-0.87415	GO:0008152	/
BraA09g001062E	7.439	4.372	5.713	13.886	23.425	15.798	21.95	64.22	49.72	2.344	2.286	2.992	4.744	4.691	5.292	20.461	5.708	5.56	1.23357	1.89112	2.17818	GO:0003677	/
BraA03g013692E	1.315	1.393	1.832	2.504	3.468	3.168	7.264	2.599	2.948	4.184	2.834	3.631	3.024	3.171	2.894	3.901	3.748	4.25	-1.19819	0.0405107	0.177627	GO:0004672	/
BraA09g000125E	28.533	23.912	20.109	10.502	7.394	5.577	7.423	3.35	2.45	5.952	12.283	12.566	11.914	10.001	5.741	8.932	7.051	7.43	1.26638	-0.227055	-0.750423	/	/
BraA09g005838E	9.824	3.39	5.906	26.184	43.692	25.347	36.166	80.763	56.517	2.155	2.371	2.311	2.111	16.47	6.737	42.516	2.648	5.302	1.51641	1.95445	1.85457	GO:0016021	K08238
BraA01g027940E	1.001	0.906	1.105	2.121	2.623	2.224	4.772	3.854	3.079	3.342	2.422	2.406	2.055	2.59	2.188	3.904	3.912	2.548	-1.40763	0.0585211	0.254087	/	/
BraA07g037210E	55.588	51.273	98.081	33.694	15.411	7.161	3.354	27.777	17.731	21.701	39.074	26.749	30.999	39.605	34.676	30.923	18.613	26.274	1.25273	-0.911645	-0.541115	GO:0008146	/
BraA09g006610E	9.848	6.257	6.48	12.872	46.276	30.943	50.751	38.417	28.969	15.323	14.817	13.52	18.716	21.044	25.04	20.37	15.698	13.915	-0.918367	0.535673	1.31783	/	/
BraA04g044192E	1.097	1.04	1.978	2.102	1.412	3.95	1.43	1.273	2.445	3.701	5.02	3.497	1.91	1.775	1.325	3.055	6.736	3.314	-1.5433	0.596967	-1.2732	/	K08269
BraA03g007826E	23.957	14.126	18.698	47.087	64.33	57.65	34.745	94.837	84.952	10.092	11.782	8.947	13.235	22.747	18.766	50.524	13.83	14.778	0.912389	1.66381	1.51595	GO:0006629	/
BraA03g010307E	5.962	4.567	4.112	7.494	16.141	17.758	0.887	11.614	17.167	11.508	15.842	8.13	6.782	4.017	4.874	4.504	10.034	6.803	-1.24684	1.44564	0.559565	GO:0004601	K00430
BraA08g040552E	13.764	6.378	11.368	30.901	50.26	31.205	33.774	67.617	36.525	4.256	4.695	4.494	5.73	25.405	17.461	40.561	7.052	10.415	1.25986	1.25293	1.3289	GO:0003700	/
BraA10g044837E	38.319	24.324	51.939	43.385	53.852	67.062	113.711	49.345	80.777	87.324	99.341	68.568	45.304	92.593	57.209	82.884	114.518	81.225	-1.12736	-0.213049	-0.122003	GO:0016020	/
BraA09g002569E	28.06	40.555	27.991	15.89	12.462	9.836	12.337	14.713	14.254	20.157	20.037	18.573	31.198	27.063	31.512	16.045	17.731	16.23	0.748287	-1.21629	-0.195806	/	/
BraA09g007177E	11.392	23.967	13.251	2.968	5.264	3.773	4.846	4.438	2.859	6.114	2.638	6.281	15.653	11.792	16.514	4.689	6.036	5.811	1.72797	-1.8361	-0.363191	/	K09422
BraA03g013253E	0.779	0.834	2.409	1.293	2.039	1.844	9.924	0.7	2.295	4.621	8.309	4.209	2.452	1.88	1.664	3.497	6.981	3.907	-2.06893	-0.178945	-0.0913516	GO:0006629	/
BraA10g046514E	17.162	7.911	9.149	6.284	8.091	5.941	5.236	6.633	5.665	3.837	4.62	5.436	6.748	6.368	5.269	5.446	5.939	5.467	1.33376	0.174761	0.138427	/	/
BraA02g028852E	3.329	1.383	4.036	4.251	5.145	9.826	5.53	2.221	2.927	7.656	9.121	7.545	4.892	4.568	3.883	4.704	12.773	6.17	-1.44667	0.560351	-1.07179	GO:0004672	/
BraA07g033469E	2.218	2.774	7.683	0.701	3.39	0.575	1.859	21.832	8.218	0.555	0.677	0.42	1.389	1.279	0	0.554	0.411	0.686	2.9624	0.866644	4.37605	/	/
BraA01g025636E	14.675	4.05	3.721	0.46	1.804	1.154	0.104	0.106	0.214	1.875	0.346	1.328	4.868	2.955	2.17	0.152	0.45	0.15	2.70413	-1.49743	-0.748389	GO:0016491	K00016
BraA09g000887E	10.966	5.744	4.742	0.889	1.001	0.214	0.427	2.172	1.314	3.263	1.566	1.409	1.348	2.385	2.889	0.361	4.908	0.409	1.81907	-1.62481	-0.434035	/	/
BraA09g000834E	4.775	2.556	1.35	0.635	1.835	2.214	0.173	0.22	0.089	0.252	0.041	0.719	1.091	1.588	1.337	0.167	0.124	0.083	3.1449	0.271722	0.447265	GO:0003700	/
BraA09g000511E	2.97	2.082	2.656	5.697	8.963	11.219	2.262	7.138	5.434	4.391	6.153	4.874	4.395	3.27	2.547	3.352	8.23	2.115	-0.970508	1.37845	0.20759	GO:0005516	/
BraA04g043442E	0.189	0.075	0.076	0.381	0.499	0.156	0.272	0.198	0.16	0.869	1.142	0.571	0.718	0.889	0.564	0.602	0.783	0.821	-2.89357	-1.03667	-1.72768	GO:0016788	K01114
BraA06g020788E	12.687	10.042	10.183	8.881	31.957	36.342	13.088	18.806	18.666	27.011	31.999	15.758	28.992	36.57	43.59	15.935	33.006	29.179	-1.15358	-0.441917	-0.543323	/	/
BraA07g036424E	34.444	20.111	31.73	11.163	11.203	9.62	3.721	4.525	7.542	13.829	17.356	14.782	26.935	35.922	27.682	7.728	19.914	9.489	0.938418	-1.47576	-1.15563	GO:0003677	/
BraA02g028814E	2.516	1.527	2.286	3.503	4.202	4.66	3.532	2.685	4.148	5.41	4.875	3.955	3.348	2.874	3.291	3.418	6.442	4.49	-1.13891	0.408033	-0.393596	GO:0016020	K16075
BraA03g011501E	6.3	5.424	13.755	8.095	5.753	12.669	30.113	6.955	11.051	18.395	25.224	22.796	9.055	13.321	7.384	15.634	19.426	12.642	-1.35667	-0.144772	0.0790182	GO:0003824	/
BraA03g008313E	20.526	10.585	9.92	6.983	5.19	6.296	2.072	2.777	2.54	5.886	4.736	6.427	10.555	9.336	10.015	3.668	2.712	4.75	1.30228	-0.676285	-0.511098	/	/
BraA08g039689E	4.767	7.293	4.614	9.875	17.234	24.605	6.315	16.286	13.206	9.592	11.593	14.855	5.292	4.118	4.428	8.584	15.798	6.751	-1.08077	1.94331	0.291043	GO:0004842	/
BraA07g037443E	1390.94	755.542	514.961	84.92	259.343	182.856	13.892	26.642	14.107	107.357	25.768	203.425	501.783	462.422	424.786	8.43	57.619	69.019	3.02293	-1.34311	-1.20793	GO:0055114	K18857
BraA05g016965E	224.542	236.142	165.321	98.646	104.077	63.147	75.296	148.75	112.856	134.862	142.154	120.502	377.225	264.634	378.227	159.03	111.619	183.964	0.687107	-1.91447	-0.347056	GO:0004781	K13811
BraA09g002997E	2.658	0.725	6.979	6.759	2.339	14.025	25.759	1.184	1.79	13.871	19.627	19.834	2.664	3.425	1.004	4.623	23.527	6.695	-2.34015	1.71875	-0.211134	GO:0016020	/
BraA10g046038E	148.751	45.969	83.817	233.69	596.526	423.733	533.263	678.271	562.337	24.591	25.179	43.827	57.867	172.075	128.07	406.575	81.837	128.361	1.60747	1.86334	1.59673	GO:0005509	/
BraA05g015376E	0.524	0.638	0.574	0.438	1.184	1.511	1.058	0.789	0.627	1.437	1.624	1.196	1.187	0.84	0.704	1.16	2.567	1.127	-1.26445	0.242972	-0.890639	/	/
BraA08g040184E	2.993	2.722	3.609	2.843	6.56	5.17	3.041	6.712	7.392	4.813	8.061	8.696	4.499	3.16	2.714	5.568	5.873	2.782	-1.1813	0.535261	0.350082	GO:0016491	K04125
BraA08g038533E	25.162	33.091	25.494	11.245	9.741	5.659	10.937	15.435	12.016	16.689	19.863	17.725	31.151	26.728	29.185	15.37	17.362	18.152	0.656022	-1.69027	-0.322598	/	K00600
BraA03g009578E	15.404	9.988	19.542	21.054	24.895	25.821	19.619	27.349	35.626	5.331	4.365	8.06	10.101	10.62	9.483	14.808	15.226	11.762	1.37073	1.27905	1.05966	GO:0005509	/
BraA02g029692E	82.185	20.338	48.795	224.18	417.204	254.46	572.262	830.889	517.746	12.224	14.062	20.516	26.087	139.556	63.582	410.311	34.498	57.844	1.72622	2.01278	2.0065	GO:0004553	K14504
BraA06g018980E	4.851	0.827	0.333	0.613	0.505	0.286	0.853	0.289	0.292	0.11	0	0.111	0.497	0.678	0.44	0.33	0.599	0.055	4.81188	-0.181382	0.617363	/	K13993
BraA01g024286E	8.082	4.62	6.923	8.56	7.841	2.507	7.713	13.273	5.295	1.376	2.846	2.94	1.267	15.322	2.741	5.378	1.522	1.741	1.4835	-0.0135684	1.68917	GO:0003700	K09286
BraA04g042536E	33.57	21.416	16.972	25.964	23.148	20.399	51.883	16.26	25.832	41.098	96.11	56.475	50.812	57.256	31.758	45.774	57.348	41.756	-1.39846	-0.988919	-0.556164	GO:0016787	/
BraA03g012451E	1.954	2.606	1.039	2.085	5.307	7.087	1.903	4.443	2.642	5.107	6.148	4.545	6.58	6.561	5.953	3.304	3.808	6.497	-1.4649	-0.351654	-0.508208	GO:0004601	K00430
BraA10g046776E	78.111	44.929	181.294	89.863	174.59	148.853	1.187	168.101	159.807	42.924	19.914	26.433	21.639	20.945	40.096	25.782	47.493	113.248	1.79836	2.37029	0.91346	GO:0004601	K00430
BraA04g043107E	59.897	42.158	44.081	19.642	23.229	13.261	13.381	31.945	31.526	30.969	32.158	30.622	36.027	41.795	45.276	34.363	24.193	29.852	0.672448	-1.10269	-0.12025	GO:0005506	K11813
BraA01g024108E	6.813	11.377	12.213	12.441	11.084	44.407	9.086	2.937	6.991	14.887	30.385	28.677	11.111	19.11	6.071	22.394	52.082	22.583	-1.25588	0.93584	-2.28233	GO:0004096	K03781
BraA01g027371E	6.727	3.84	6.926	4.307	4.383	4.634	9.093	3.542	3.571	3.125	2.121	2.958	5.009	4.883	4.395	3.41	2.877	2.295	1.12457	-0.0752497	0.987227	GO:0005515	/
BraA01g027551E	1.124	0.482	1.699	2.598	3.19	5.659	1.408	3.203	2.379	3.457	5.332	3.97	1.529	3.208	1.521	2.725	5.159	2.781	-1.92269	0.905654	-0.522006	/	/
BraA04g043877E	7.06	9.135	6.729	2.607	2.842	2.278	2.529	2.574	1.298	2.413	4.666	3.413	2.118	3.768	3.204	3.334	4.137	3.221	1.15608	-0.205418	-0.655551	GO:0046872	/
BraA06g020337E	1.607	1.391	0.946	0.931	0.938	0.43	0.95	0.758	0.497	0.615	0.529	0.383	0.489	1.092	0.792	0.595	0.482	0.697	1.40225	-0.0198199	0.394286	GO:0004553	/
BraA08g041269E	6.147	1.556	3.854	2.579	2.702	2.934	0.079	2.49	1.998	1.43	0.623	0.875	0.639	0.601	0.61	0.407	0.227	0.227	2.01713	2.17709	2.4953	GO:0004672	/
BraA08g039412E	52.674	52.736	29.448	30.444	20.891	24.558	19.858	23.156	29.206	26.369	17.612	23.319	46.608	33.817	42.702	24.532	26.779	30.875	1.03792	-0.683243	-0.108943	GO:0003700	/
BraA03g013863E	21.66	22.539	28.598	44.785	35.799	52.363	50.894	61.231	65.702	40.467	32.878	43.237	24.403	22.869	19.891	50.459	57.006	54.536	-0.648643	1.00617	0.213996	GO:0005507	K00276
BraA09g006734E	1.956	1.824	2.371	2.111	2.161	3.813	4.89	2.714	5.508	3.286	4.597	4.817	2.824	2.479	1.917	3.541	3.408	3.083	-1.0169	0.191027	0.455488	GO:0005506	/
BraA06g023691E	6.578	4.366	8.422	13.301	8.078	9.684	7.293	6.646	9.824	2.277	3.182	2.605	4.066	5.984	6.253	4.602	4.557	7.482	1.29159	0.944282	0.588798	GO:0003676	/
BraA06g022206E	4.615	4.617	4.65	8.814	8.489	16.875	17.722	5.518	9.77	9.627	8.639	12.291	10.021	16.026	9.845	21.628	26.105	17.507	-1.10619	-0.0413605	-0.91427	/	/
BraA03g008670E	2.621	0.38	1.842	9.799	42.411	17.91	28.075	88.525	46.107	0.207	0.101	0.313	0.968	3.216	1.135	23.448	0.852	1.434	2.99864	3.78596	2.73829	GO:0006855	K03327
BraA09g004441E	16.041	10.437	12.525	18.677	27.129	19.349	22.536	19.226	15.359	6.518	6.32	8.589	8.254	9.966	10.209	13.742	8.994	8.344	0.896682	1.23371	0.954605	GO:0003677	K09287
BraA04g043948E	2.4	2.556	3.12	6.419	3.707	11.636	0	1.057	2.95	5.116	7.713	5.938	8.846	5.157	4.093	2.319	10.715	4.674	-1.18857	0.283182	-2.06765	/	/
BraA01g026569E	2.429	1.884	7.24	5.262	3.282	6.113	3.835	3.85	4.984	0.695	0.581	1.15	0.646	0.914	0.89	1.484	2.499	0.785	2.27876	2.59968	1.48716	GO:0005618	/
BraA10g045485E	3.297	2.378	2.549	3.333	2.578	5.006	4.35	1.69	1.298	6.372	5.766	5.648	6.531	6.442	9.023	2.908	4.471	4.4	-1.08089	-0.986375	-0.606176	/	/
BraA01g028242E	0.131	0.131	0.395	0.176	0.311	0.587	0.449	0.32	0.415	0.96	1.574	1.099	1.179	0.759	0.652	0.87	1.12	1.035	-2.44427	-1.23855	-1.27516	GO:0016787	K06269
BraA07g036935E	5.615	6.258	3.97	3.884	5.168	6.79	14.278	8.583	8.028	8.334	12.315	12.774	16.042	16.2	13.558	23.208	9.64	16.961	-1.04584	-1.49883	-0.618076	GO:0004089	K01673
BraA10g045393E	22.06	17.635	36.123	25.639	21.013	29.737	114.166	28.928	33.752	42.339	65.188	57.673	21.974	29.636	21.635	61.773	77.077	52.001	-1.09705	0.0831613	-0.0417838	GO:0006508	/
BraA03g011145E	1.669	1.331	3.24	1.345	2.636	1.654	4.166	5.356	4.735	0.63	0.85	0.464	0.824	1.536	0.868	3.162	1.315	1.843	1.70761	0.847622	1.25084	GO:0005515	/
BraA09g001894E	15.269	12.038	35.197	3.272	21.53	11.371	7.72	5.944	9.953	9.264	6.913	6.021	16.67	12.226	14.623	10.094	10.595	9.056	1.52086	-0.198455	-0.260386	/	/
BraA01g025521E	2.401	2.631	3.974	4.798	5.009	7.052	7.019	5.461	7.624	5.782	7.091	6.404	4.183	4.042	2.851	7.02	8.421	8.656	-1.06988	0.63326	-0.185995	GO:0046872	K10666
BraA05g017118E	27.485	28.509	34.026	13.275	12.215	15.84	11.019	13.738	15.773	23.291	18.184	19.044	44.34	33.438	39.073	14.498	17.36	16	0.603815	-1.47514	-0.160843	GO:0016491	/
BraA04g041434E	7.34	4.094	5.725	16.552	22.329	14.549	23.763	47.188	29.248	1.896	3.105	2.697	2.576	7.313	4.284	21.036	2.24	4.117	1.18619	1.95051	1.94736	GO:0016021	K08238
BraA02g028946E	8.95	10.328	17.559	19.656	16.049	13.41	48.928	28.429	34.766	21.747	28.087	25.978	21.397	21.087	20.358	36.906	34.623	34.627	-1.0145	-0.337117	0.151553	GO:0004144	/
BraA09g006121E	52.234	14.202	18.196	174.527	277.245	208.218	269.779	476.919	401.075	8.007	9.904	9.229	14.841	62.066	48.734	256.583	20.388	54.072	1.67556	2.43698	1.8651	GO:0055085	K15104
BraA04g043336E	0.313	0.653	0.763	0.29	0.639	0.054	0.081	1.261	1.216	0.105	0.102	0.079	0.183	0.027	0.078	0.235	0.181	0.207	2.62503	1.81194	2.12654	GO:0004672	/
BraA03g007792E	19.22	12.182	28.997	47.632	38.501	72.954	21.255	13.751	36.908	31.251	66.764	60.483	23.668	47.735	21.314	31.526	82.831	52.4	-1.36602	0.803271	-1.14216	/	/
BraA05g017579E	10.242	6.587	14.338	14.692	15.041	16.853	18.833	13.125	18.16	18.112	33.386	23.054	13.83	18.875	10.778	19.485	31.094	24.942	-1.23211	0.125968	-0.51597	GO:0004672	K07198
BraA05g018250E	276.453	290.031	313.604	290.141	191.951	302.571	455.173	205.121	230.598	360.286	782.941	682.376	163.864	296.53	130.004	489.342	582.789	315.193	-1.02497	0.426075	-0.567187	GO:0046872	/
BraA09g005890E	15.766	13.506	20.75	26.364	31.887	14.495	36.678	83.549	55.319	7.476	11.447	8.772	6.881	13.288	9.729	40.892	10.671	11.712	0.880483	1.31347	1.5522	GO:0009690	K00279
BraA04g043444E	38.328	37.362	28.877	45.456	45.619	64.163	32.362	30.869	38.677	49.687	55.67	55.272	54.561	57.855	51.48	66.607	90.173	70.969	-0.587527	-0.0500162	-1.08288	GO:0004672	/
BraA10g047158E	3.14	4.769	4.86	5.6	3.868	4.379	2.503	3.236	4.079	7.003	10.985	7.98	9.927	8.6	7.573	8.008	8.55	10.198	-0.996674	-0.899416	-1.36865	GO:0004650	K01184
BraA02g032313E	5.305	5.001	7.4	5.776	1.247	1.375	3.684	3.855	5.831	2.86	1.395	0.824	2.352	3.345	3.052	3.259	3.328	2.827	1.83306	-0.0781421	0.580561	GO:0005515	/
BraA08g040930E	41.407	28.504	39.903	34.503	34.49	35.928	17.679	28.588	41.604	75.264	89.452	49.949	110.073	89.025	84.68	39.509	59.497	55.47	-0.93751	-1.41053	-0.735075	GO:0016020	/
BraA02g031791E	0.377	0.339	0.835	1.561	1.164	1.418	0.311	0.751	0.864	1.257	1.581	1.419	1.145	0.823	0.751	1.19	1.476	2.583	-1.43121	0.624517	-1.36472	GO:0004672	/
BraA03g009708E	22.273	12.164	14.456	39.611	63.755	40.946	75.899	96.356	89.114	8.006	9.593	7.738	12.002	18.855	16.678	53.762	8.842	12.935	0.980107	1.64315	1.86086	/	/
BraA04g041676E	7.953	10.665	9.4	6.77	2.66	1.228	1.771	2.335	3.045	3.171	6.304	4.513	2.495	6.935	5.304	3.933	3.99	2.727	1.02971	-0.477794	-0.498769	/	/
BraA09g002275E	11.041	5.459	6.947	25.021	39.39	34.857	17.98	40.144	34.879	2.372	3.842	3.671	5.045	12.267	11.054	25.802	5.687	10.047	1.27717	1.84998	1.23966	GO:0003700	K09286
BraA01g026056E	1.049	0.875	1.174	1.061	1.544	1.389	1.623	0.734	0.987	2.918	3.529	2.176	1.869	2.21	1.976	1.92	3.284	3.172	-1.44832	-0.568488	-1.24799	GO:0003676	/
BraA02g031216E	1.693	1.396	2.099	1.787	3.752	3.2	6.985	2.05	1.555	4.302	4.56	2.534	4.53	3.698	4.137	3.268	4.284	3.497	-1.1068	-0.456071	0.0105186	/	/
BraA02g031239E	14.496	9.943	23.389	12.489	13.883	15.656	7.18	10.444	10.674	6.754	8.076	8.151	7.914	11.096	13.152	5.709	9.98	8.182	1.08489	0.418837	0.328862	GO:0015743	/
BraA05g018261E	5.742	4.608	9.59	12.884	21.021	36.663	5.702	12.345	11.505	10.73	22.012	16.547	14.648	6.607	7.074	6.927	10.836	9.48	-1.28038	1.35416	0.203396	GO:0005507	K05909
BraA01g027155E	1.982	1.218	3.258	2.25	1.134	2.523	3.157	1.752	2.613	5.536	6.08	4.808	2.858	2.601	2.393	3.125	4.71	3.166	-1.31921	-0.397521	-0.474035	GO:0008152	/
BraA08g038801E	12.914	5.691	14.271	10.296	6.636	6.604	13.762	8.062	6.382	4.13	5.389	4.478	9.093	5.275	7.915	11.557	7.282	15.819	1.26055	0.0897685	-0.221822	/	/
BraA02g033008E	13.701	10.598	5.549	2.428	2.59	2.83	4.76	1.483	2.342	5.091	3.403	2.376	4.294	3.763	5.494	3.149	1.815	1.444	1.49308	-0.760481	0.486808	/	K09419
BraA02g032985E	0.313	0.381	0.203	0.249	0.866	0.696	1.085	0.399	0.426	1.255	1.399	0.61	0.807	0.642	1.116	0.536	0.641	0.841	-1.83268	-0.449023	-0.00550526	GO:0004672	/
BraA03g007761E	18.923	8.313	11.29	8.86	27.244	13.714	20.457	37.088	13.561	5.628	6.479	5.602	6.088	12.377	7.973	15.857	3.382	2.902	1.15376	0.9717	1.766	GO:0016491	K13366
BraA07g035324E	37.844	25.339	32.765	37.845	30.727	31.417	20.177	21.554	34.462	43.855	96.242	67.797	39.277	49.755	29.894	47.689	65.148	53.354	-1.08734	-0.231903	-1.04985	GO:0016787	/
BraA01g025297E	14.013	11.782	26.132	28.977	26.615	48.632	39.14	22.495	34.199	30.113	42.369	44.23	14.753	17.604	11.262	36.051	54.596	33.855	-1.14187	1.2835	-0.30453	/	/
BraA06g022131E	119.8	99.821	93.883	137.999	276.208	167.572	416.823	534.499	285.984	79.058	65.749	75.023	90.921	143.572	136.305	254.547	77.625	116.899	0.544897	0.697633	1.54182	/	/
BraA03g008948E	7.475	7.685	5.817	7.297	1.838	0.427	1.436	2.652	2.401	1.91	4.028	3.434	2.273	5.018	2.725	3.808	4.586	2.398	1.19173	-0.0976732	-0.652008	GO:0004553	K08235
BraA08g038382E	6.856	6.781	9.497	5.592	0.873	2.099	1.848	1.881	2.474	3.588	4.565	3.459	2.03	2.714	2.253	3.811	2.541	2.313	1.02209	0.271471	-0.40834	/	/
BraA10g045227E	0.196	0.117	2.759	0.396	0.04	0.162	2.704	0.534	0.373	0.039	0	0	0.196	0.241	0.039	0.312	0.464	0.194	6.21653	0.309828	1.96571	GO:0006629	/
BraA07g036758E	14.287	15.716	14.889	8.025	4.182	3.971	2.259	7.47	7.473	6.357	10.638	5.303	7.68	9.254	11.136	7.814	6.763	8.72	1.03703	-0.78741	-0.353905	GO:0003676	/
BraA09g006163E	3.295	3.502	3.181	9.231	17.413	8.538	0.991	23.058	26.518	1.512	0.872	1.593	2.545	0.633	0.548	1.508	1.561	1.359	1.36176	3.27493	3.59941	GO:0003700	/
BraA04g044238E	2	1.685	3.393	3.938	4.397	3.818	8.036	5.525	8.244	5.902	5.86	6.692	6.118	4.638	3.149	4.834	2.497	5.208	-1.35357	-0.169418	0.86968	GO:0006869	/
BraA04g044582E	1.5	1.385	0.465	0.972	4.387	3.547	2.499	1.655	1.831	3.773	4.018	2.755	4.509	2.994	3.605	2.495	3.649	3.615	-1.62081	-0.26062	-0.627547	GO:0006952	K08472
BraA07g033376E	22.428	28.113	32.247	12.772	25.738	11.428	0.221	0.955	0.736	13.827	2.3	8.103	14.698	14.972	14.2	0.855	1.111	1.96	1.80823	0.232115	-0.949765	GO:0016491	K05933
BraA05g014315E	6.396	2.742	24.139	3.695	0.827	0.21	4.294	5.009	3.439	1.626	1.388	2.561	1.221	2.705	2.126	3.041	0.703	1.909	2.60205	-0.381612	1.25104	GO:0005576	/
BraA01g023902E	4.787	1.287	0.288	0.759	4.476	0.222	0.885	1.838	0.529	0.322	0.105	0.216	0.43	0.586	1.96	0.428	0.177	0.424	3.3511	0.959283	1.75305	GO:0009058	/
BraA01g025007E	3.57	3.019	3.538	4.372	19.809	12.904	20.927	25.103	11.088	8.252	7.936	4.54	8.347	6.631	7.323	10.429	13.913	6.95	-1.00312	0.7956	0.956312	GO:0003700	/
BraA10g047105E	99.039	77.262	76.12	137.079	299.269	148.752	254.11	336.126	272.097	58.56	62.295	53.892	78.688	124.282	86.298	215.184	54.095	62.117	0.56219	1.06497	1.45334	GO:0016616	K00012
BraA03g009144E	14.44	15.8	40.686	20.53	5.516	1.754	4.655	8.881	9.074	9.262	9.034	6.603	4.635	5.779	6.638	10.698	4.014	7.033	1.53565	0.678557	0.13333	/	/
BraA06g023153E	8.871	7.84	6.783	7.96	7.077	10.634	21.021	4.3	8.823	18.298	12.769	11.648	19.028	20.732	12.826	9.175	8.416	11.069	-0.829094	-1.01118	0.316998	GO:0004650	/
BraA01g028400E	10.869	10.44	13.066	11.63	6.046	4.941	18.367	12.144	10.798	8.512	6.61	7.638	18.21	11.547	18.055	13.546	8.733	12.768	0.626096	-1.07775	0.311817	/	/
BraA04g043337E	0.389	0.311	2.976	0.255	0.139	0.04	0.14	0.102	0.432	0.214	0.095	0.078	0.097	0.119	0.097	0.233	0.115	0.173	3.27006	0.473549	0.433328	GO:0005515	/
BraA05g017097E	2.473	2.324	1.736	1.818	2.748	5.359	3.479	0.944	1.824	9.004	9.88	3.101	6.984	4.914	5.904	4.788	14.592	6.526	-1.72004	-0.806579	-1.97886	/	/
BraA07g033342E	11.073	18.752	15.107	18.247	9.948	12.922	10.523	18.761	16.333	25.053	72.888	30.266	34.163	45.38	33.389	44.299	27.75	45.983	-1.48784	-1.44776	-1.28998	/	/
BraA10g044784E	3.557	2.598	4.778	4.852	4.486	0.702	0.757	20.564	5.856	1.526	1.654	0.855	1.867	2.719	2.083	3.156	0.446	1.676	1.4653	0.60698	2.46613	GO:0004842	/
BraA06g022599E	143.374	53.681	62.21	60.928	56.181	64.873	85.004	38.661	60.834	37.005	14.002	37.592	47.58	37.803	56.452	62.191	66.029	52.585	1.5875	0.385236	0.0986823	GO:0004672	K07198
BraA06g022667E	1.276	1.072	0.891	1.324	2.738	0.934	0.825	2.749	1.746	0.46	0.565	0.463	0.528	1.342	0.848	1.409	0.773	0.539	1.15292	0.92602	1.05395	GO:0005515	/
BraA03g010010E	59.805	18.741	20.457	155.235	174.897	164.971	158.189	276.478	247.012	8.919	9.98	14.476	18.774	62.55	55.527	179.815	15.604	51.011	1.60454	1.88928	1.53957	GO:0005515	/
BraA08g040617E	33.638	14.862	16.629	12.449	14.589	12.808	9.343	9.366	8.027	10.541	8.278	10.67	14.933	12.936	15.038	9.887	8.599	9.889	1.17826	-0.0773331	-0.00655326	GO:0005506	K00472
BraA01g023826E	5.918	5.758	6.166	3.156	0.743	0.378	0.753	0.979	0.987	1.177	3.682	1.513	0.447	2.492	2.345	1.092	1.763	1.324	1.51017	-0.327537	-0.540363	GO:0003700	/
BraA02g032840E	2.263	1.891	1.475	1.454	3.391	2.097	6.593	2.012	3.579	3.093	4.057	7.632	1.975	1.528	1.912	3.907	2.5	2.609	-1.35951	0.405469	0.499046	/	/
BraA03g010948E	7.483	7.604	6.342	14.29	2.541	0.246	3.063	3.616	5.405	2.735	3.828	3.476	0.952	9.249	4.146	3.32	8.218	3.408	1.12414	0.211114	-0.228229	/	/
BraA05g017530E	127.549	103.336	45.507	108.037	171.466	118.468	118.552	140.753	122.896	50.478	34.819	33.037	112.57	104.973	107.633	71.662	43.178	103.078	1.26024	0.330449	0.890818	GO:0000234	K05929
BraA02g031809E	21.222	18.547	10.038	9.978	16.886	11.221	17.791	13.527	12.371	9.545	7.486	6.72	26.261	16.836	19.063	12.434	8.381	10.334	1.10315	-0.66842	0.563707	/	/
BraA01g027593E	278.355	336.708	333.368	158.92	184.66	107.31	187.5	222.685	189.427	239.028	253.13	215.975	324.063	337.513	391.594	387.06	154.405	289.21	0.451395	-1.19424	-0.393223	GO:0005515	/
BraA05g014324E	127.896	76.396	41.63	29.874	40.134	36.06	27.352	22.625	20.546	34.621	25.93	40.981	62.797	46.764	59.575	24.33	20.529	22.493	1.31323	-0.638815	0.143598	GO:0006631	K03921
BraA06g020664E	4.584	4.463	5.295	5.87	4.856	3.357	10.34	15.268	11.449	2.998	1.85	2.282	4.165	5.323	7.802	8.175	2.235	5.927	1.0406	-0.274602	1.26076	GO:0005515	/
BraA03g011570E	0.475	0.428	0.478	0.792	0.484	0.32	0.147	0.897	0.578	1.117	1.762	0.935	2.094	1.898	3.623	0.474	3.051	1.88	-1.43812	-2.24011	-1.63672	/	/
BraA04g042660E	30.121	8.548	17.145	67.748	83.785	82.88	71.549	114.812	134.678	4.349	6.329	8.192	13.487	29.914	28.548	83.451	20.694	25.789	1.59727	1.74019	1.37554	GO:0005509	/
BraA10g047086E	10.836	9.832	10.967	14.319	19.818	13.163	35.666	8.994	9.601	30.377	20.23	14.139	32.274	31.035	40.26	13.03	28.346	20.746	-1.00115	-1.09535	-0.123357	/	/
BraA02g033242E	0.785	0.188	0.98	1.777	1.215	2.374	4.079	1.285	2.126	1.728	3.218	2.66	0.881	1.254	0.688	3.07	3.784	1.894	-1.93504	0.946874	-0.155579	GO:0003677	K09338
BraA05g015172E	0.34	0.225	0.318	0.365	0.773	0.407	0.429	0.608	0.557	0.113	0.168	0.164	0.165	0.272	0.239	0.387	0.177	0.18	1.01802	1.24003	1.17605	GO:0003676	/
BraA10g047253E	1.176	0.243	8.826	3.896	18.469	4.582	21.088	57.945	27.817	0.244	0.396	0.246	0.488	2.909	0.485	13.644	1.283	0.441	3.54993	2.86409	2.87634	/	K13464
BraA06g023038E	5.212	15.641	5.298	12.901	17.037	19.085	11.257	9.996	17.416	17.914	31.418	25.77	32.839	25.663	14.427	20.778	58.694	28.035	-1.49245	-0.54195	-1.39816	GO:0005524	K05658
BraA10g046614E	19.598	10.705	7.737	13.535	23.428	15.484	22.079	21.145	22.607	37.353	31.887	22.572	37.513	27.089	47.251	22.077	35.176	27.615	-1.23608	-1.05001	-0.286683	GO:0003676	/
BraA02g032297E	1.878	2.885	3.142	2.068	1.367	1.46	1.972	1.127	2.165	1.041	1.343	1.286	1.008	0.962	1.472	1.64	2.188	1.427	1.13534	0.524206	0.0739067	GO:0016021	/
BraA09g004045E	2.114	1.021	2.35	2.211	3.379	5.515	5.114	1.798	2.546	5.693	6.265	3.09	3.287	2.95	2.472	3.02	7.458	3.787	-1.42739	0.387743	-0.519121	GO:0003700	/
BraA09g001873E	9.069	6.383	16.468	50.886	23.701	109.12	7.174	10.837	51.864	15.074	33.295	45.075	13.112	29.457	6.578	38.862	63.745	67.61	-1.52376	1.92064	-1.21998	GO:0016831	K01590
BraA03g010694E	22.296	24.418	11.245	4.532	8.986	3.255	20.674	10.698	5.439	10.547	9.173	5.013	17.766	14.508	16.371	11.428	14.194	4.859	1.26229	-1.49192	0.349345	/	K03283
BraA09g000502E	3.359	2.291	1.435	5.865	2.333	2.004	2.31	1.763	2.477	5.859	5.318	5.392	2.244	4.38	2.335	3.149	7.344	4.079	-1.19131	0.182464	-1.07581	GO:0003824	/
BraA06g023782E	24.106	13.543	7.769	20.04	55.805	16.932	39.01	107.27	43.529	5.033	6.527	6.11	7.728	31.722	10.539	32.673	5.42	7.687	1.39638	0.948461	2.13707	GO:0005576	/
BraA03g008988E	1.994	0.967	1.156	1.955	2.339	4.007	0.561	0.888	0.703	6.109	6.195	2.195	4.177	3.961	5.181	1.327	9.017	4.364	-1.78468	-0.650029	-2.68269	/	/
BraA01g024121E	50.928	11.284	10.242	3.812	7.744	4.932	2.04	1.46	1.177	3.898	3.018	5.021	8.981	4.433	7.366	1.758	2.016	1.407	2.64074	-0.289836	-0.0688547	/	/
BraA02g030530E	39.386	41.294	28.416	28.692	61.411	39.305	34.598	82.325	66.805	57.687	62.234	53.544	95.874	85.159	90.608	90.35	75.695	88.03	-0.637129	-1.02273	-0.382044	GO:0004089	K01673
BraA01g027239E	14.465	4.85	12.15	13.247	11.633	37.334	36.789	2.692	6.997	20.34	25.75	36.554	9.838	10.838	7.313	16.999	28.992	11.379	-1.36204	1.18259	-0.241562	GO:0005515	/
BraA08g039986E	2.565	2.237	3.667	6.369	5.394	5.683	3.286	7.766	8.137	1.697	1.502	1.805	0.802	1.278	1.354	4.166	3.249	2.383	0.789161	2.36881	1.05008	GO:0046983	/
BraA04g041733E	8.307	2.337	3.203	1.968	1.719	0.471	2.343	3.815	2.679	22.091	11.725	12.05	4.617	12.633	14.821	1.555	10.263	7.642	-1.69033	-2.92528	-1.04638	GO:0003677	/
BraA04g044112E	192.891	122.377	45.297	6.927	33.784	10.997	5.35	4.145	3.676	15.768	3.02	23.72	45.107	51.334	61.544	5.415	8.795	6.544	3.12581	-1.54198	-0.575813	GO:0004332	K01623
BraA07g034788E	2.278	5.278	8.093	14.668	8.672	12.924	85.223	23.033	26.522	13.205	16.628	14.278	2.403	4.668	2.631	11.131	27.733	18.153	-1.4696	1.91748	1.31359	GO:0030001	/
BraA03g011700E	0.676	0.846	2.64	0.37	0.517	0.438	0.581	0.473	0.179	0.367	0.248	0.313	0.339	0.26	0.393	0.197	0.362	0.558	2.1927	0.44849	0.230083	GO:0008271	K17471
BraA07g037469E	1.707	0.913	0.92	1.324	6.105	4.319	0.983	8.458	4.579	2.861	3.295	2.523	2.665	4.311	5.462	1.981	4.276	3.888	-1.26201	-0.0175216	0.567882	/	K07192
BraA03g009482E	28.064	18.841	10.29	11.768	9.956	7.702	6.371	4.987	5.711	8.528	8.451	9.041	7.72	8.866	8.63	5.589	6.272	6.044	1.17139	0.24287	0.00757419	/	K02937
BraA09g005688E	23.93	15.656	16.119	39.662	46.111	64.66	26.062	32.928	35.948	9.556	10.623	11.898	10.268	20.852	21.416	24.378	10.96	17.291	0.828692	1.55386	0.926215	GO:0000079	/
BraA06g023163E	3.879	4.893	4.35	9.516	24.056	23.006	22.168	39.342	28.17	7.431	8.863	6.23	8.452	7.915	7.166	19.599	15.305	12.318	-0.749949	1.3152	1.00946	/	/
BraA05g014609E	26.3	14.75	12.105	9.891	11.843	9.514	8.227	7.329	7.165	8.552	7.892	9.729	14.03	13.364	13.962	7.996	7.743	9.224	1.05688	-0.374606	-0.0576262	GO:0003756	K10950
BraA03g009016E	0.178	0.357	0.779	1.744	2.364	4.07	0.368	0.749	1.889	2.502	2.789	1.141	2.683	1.707	1.958	0.891	1	1.472	-2.26617	0.398555	-0.0906733	GO:0004568	K01183
BraA02g033041E	5.4	6.207	3.245	3.735	4.97	3.142	4.153	6.414	7.52	9.39	9.02	11.328	20.506	15.869	14.738	16.832	15.918	25.637	-0.968205	-2.07942	-1.61138	GO:0016491	/
BraA03g008764E	178.74	219.304	253.122	101.743	38.881	32.147	23.014	47.456	58.089	95.21	164.694	118.206	121.749	132.629	113.44	88.863	95.538	124.312	0.811254	-1.10083	-1.18299	GO:0005576	/
BraA02g029294E	31.162	15.477	30.468	15.716	70.715	33.744	17.362	49.953	28.664	12.436	11.341	15.686	11.085	11.22	11.031	17.314	9.444	8.436	0.997745	1.91455	1.53533	/	/
BraA03g013173E	31.446	12.199	7.28	5.879	6.211	4.974	6.581	4.089	4.123	5.37	5.569	5.64	6.054	7.867	7.882	5.072	4.911	5.419	1.65572	-0.326368	0.0178474	/	/
BraA03g009458E	666.262	291.96	199.024	75.998	141.055	98.082	26.564	24.683	25.213	71.901	34.334	119.113	241.362	157.47	209.631	25.32	22.595	28.265	2.39959	-0.90625	0.0828569	GO:0006631	K03921
BraA10g046629E	1.634	1.253	1.042	2.863	7.378	2.991	1.011	17.205	9.509	0.164	0.425	0.385	0.164	0.502	0.597	4.838	0.484	1.347	2.04216	3.44464	2.1435	GO:0003700	/
BraA03g010019E	21.713	25.597	47.652	37.568	34.685	24.776	16.458	72.551	78.545	16.432	16.278	15.328	19.104	19.062	20.231	23.71	21.614	29.657	1.01033	0.75441	1.24456	/	K06167
BraA07g037636E	147.555	100.382	227.542	334.13	160.774	612.028	93.387	66.47	291.793	228.54	426.98	412.151	275.613	428.673	154.777	277.756	654.588	549.256	-1.14074	0.38212	-1.64752	/	/
BraA09g000321E	42.305	36.728	36.938	58.114	159.269	89.974	79.568	232.857	137.473	30.41	30.633	29.869	35.604	47.337	39.462	89.968	28.396	30.079	0.382641	1.38268	1.68399	/	K20887
BraA05g015028E	263.608	200.193	567.142	541.13	205.601	712.904	583.239	237.469	388.882	572.202	969.229	1026.27	118.534	151.846	75.953	486.33	1021.44	608.587	-1.29149	2.08371	-0.734821	/	/
BraA07g035196E	1.998	0.906	1.449	3.124	14.492	10.768	5.606	8.557	7.331	2.934	3.668	3.092	2.216	2.211	2.896	3.324	2.975	2.399	-1.12414	2.01818	1.38681	/	/
BraA03g009421E	3.722	3.022	7.662	4.69	8.957	4.864	4.674	7.134	6.451	1.242	2.002	1.905	2.649	3.703	4.088	3.392	1.866	2.882	1.50969	0.871084	1.24517	/	K06911
BraA10g046906E	158.924	138.136	89.283	111.6	187.022	185.06	168.967	139.046	173.628	183.841	291.056	258.02	338.135	264.48	156.7	368.285	360.673	451.281	-0.89212	-0.613161	-1.21773	GO:0006520	K00261
BraA09g006679E	1.332	3.451	1.402	2.142	4.44	4.768	1.936	1.398	1.537	6.181	4.966	5.803	7.582	5.767	6.097	1.088	5.863	3.893	-1.42163	-0.735307	-1.07212	GO:0005576	/
BraA06g020097E	310.186	160.083	74.027	61.091	146.23	97.767	76.502	51.788	46.936	56.365	52.094	88.915	219.464	133.222	94.474	53.584	57.625	46.382	1.50087	-0.505773	0.22949	GO:0009058	K00814
BraA09g005205E	9.372	11.564	3.527	6.195	24.811	22.921	26.161	20.782	13.788	19.823	25.974	17.174	24.795	25.218	19.334	9.201	22.369	22.979	-1.3311	-0.305256	0.239604	GO:0005199	/
BraA09g002824E	0.043	0.087	0.087	0.131	0.132	0.045	0.089	0.045	0.137	0.519	0.253	1.963	0.043	0.221	0.043	0.173	0.342	0.128	-3.62398	0.0280695	-1.16982	GO:0009765	K08916
BraA08g039658E	11.061	4.588	5.481	2.773	3.619	2.656	2.226	0.614	2.522	2.656	1.888	3.63	5.362	4.192	4.484	2.603	3.067	2.803	1.40621	-0.604017	-0.595811	/	/
BraA09g000222E	16.451	16.57	42.416	22.936	10.445	0.701	9.454	8.634	10.892	12.785	10.528	6.898	3.764	7.658	9.214	10.198	4.047	14.866	1.34661	0.712479	0.0672832	GO:0016491	/
BraA09g002161E	5.438	4.596	4.849	9.006	9.679	13.605	8.673	4.724	6.781	7.886	6.746	9.084	3.759	4.676	4.769	6.833	5.252	5.845	-0.639703	1.32142	0.241151	GO:0016020	/
BraA08g038892E	1.208	0.806	0.135	1.628	3.418	0.835	1.246	2.113	1.421	8.063	4.85	1.761	5.649	8.389	16.33	1.34	2.521	3.188	-2.73381	-2.31989	-0.474267	/	K11714
BraA10g047131E	47.365	25.897	39.403	29.127	20.94	29.858	0.476	2.206	1.573	25.508	8.661	10.76	28.511	20.746	25.305	1.228	2.635	2.029	1.36214	0.118118	-0.376944	GO:0016702	K10712
BraA02g029046E	4.59	2.791	5.213	4.276	10.405	4.384	4.967	24.938	8.81	1.757	1.362	2.407	1.353	2.951	1.885	6.513	1.156	1.469	1.22044	1.67554	2.17418	GO:0003824	/
BraA03g008766E	7.289	7.734	7.743	9.96	27.676	14.513	20.735	47.112	24.732	4.246	5.738	4.324	6.021	6.608	7.181	16.227	5.851	5.071	0.698956	1.45121	1.85431	/	/
BraA08g040511E	1.169	0.835	0.757	1.941	1.361	3.375	0	0.526	0.884	3.093	2.12	3.033	1.088	1.198	1.249	0.583	1.981	1.9	-1.54424	0.9409	-1.58207	GO:0006952	/
BraA07g035059E	199.203	100.784	98.24	50.589	57.001	43.216	15.471	38.827	38.365	76.828	24.368	54.973	151.305	99.501	128.641	23.631	34.302	41.326	1.38889	-1.30362	-0.0130244	/	/
BraA04g043598E	0.179	0.179	0.158	0.519	0.273	0.486	0.184	0.07	0.378	0.76	0.72	0.383	0.806	0.687	0.401	0.268	1.17	0.486	-1.82501	-0.554974	-1.53516	GO:0004672	/
BraA02g029290E	20.703	18.342	36.633	32.208	19.923	55.186	9.615	30.472	42.61	79.546	87.293	30.606	33.226	22.229	58.435	22.039	55.954	29.406	-1.35703	-0.0606154	-0.293331	/	/
BraA05g018089E	2.74	2.036	1.341	2.85	3.988	5.275	5.008	4.931	4.475	7.055	5.735	3.634	5.571	3.449	4.763	4.377	7.12	5.191	-1.39115	-0.153305	-0.130542	/	/
BraA01g025008E	0.091	0.046	0.046	0.184	0.463	0.471	1.173	0.382	0.433	0.774	0.755	0.321	0.684	0.839	0.953	0.499	0.27	0.855	-3.31258	-1.10629	0.363277	/	K01728
BraA03g012922E	6.236	3.926	6.824	10.272	35.869	17.884	19.465	50.954	29.528	1.938	2.993	3.092	5.226	6.444	5.575	12.288	4.57	3.989	1.11109	1.95199	2.34597	GO:0003700	/
BraA04g043802E	0.626	1.399	1.001	1.228	3.337	0.458	0.152	6.722	3.798	0.295	0.27	0.501	1.033	0.566	0.495	0.698	1.128	1.001	1.53735	1.31349	2.01834	GO:0005515	/
BraA09g005468E	88.702	74.152	94.075	142.933	97.273	225.433	129.437	88.714	193.683	112.844	115.761	137.557	76.773	81.59	58.602	99.766	193.66	125.398	-0.480438	1.12239	0.0476061	/	K06617
BraA06g023333E	4.866	15.912	5.175	3.28	7.758	22.09	10.784	7.189	6.963	24.768	19.055	29.557	10.476	22.022	8.313	4.813	37.413	9.274	-1.4663	-0.254502	-0.961776	GO:0016787	K14379
BraA05g014335E	2.952	3.121	6.061	5.125	3.348	3.118	14.424	7.134	11.084	9.259	6.909	12.03	9.77	9.874	8.389	11.622	15.418	14.001	-1.18721	-1.25973	-0.258017	GO:0008757	K21552
BraA03g008703E	0.824	2.232	2.394	1.177	2.47	1.156	0.55	2.138	3.696	0.194	0.71	0.245	0.243	0.099	0.048	0.145	0.479	0.48	2.26512	3.66059	2.61067	GO:0003700	/
BraA10g047470E	0.591	0.437	0.311	0.104	0.314	0	0.106	0.054	0.027	0.129	0.075	0.026	0	0.026	0.051	0.026	0	0.025	2.57486	2.49403	/	GO:0008271	K17469
BraA09g002055E	3.507	3.533	3.187	5.529	27.954	12.809	24.108	49.5	20.841	6.383	5.341	4.652	7.397	7.663	6.481	15.936	9.187	6.794	-0.647612	1.16962	1.65413	GO:0004672	/
BraA06g020869E	0.297	0.458	0.299	0.627	1.346	2.068	0.362	0.198	0.799	0.621	1.395	1.442	2.675	0.718	0.242	0.7	2.905	0.934	-1.6854	0.187988	-1.66972	GO:0004672	/
BraA04g044473E	21.317	11.059	7.733	3.627	5.737	6.139	1.119	2.102	1.678	3.717	2.485	7.535	14.255	11.626	12.938	2.124	3.01	3.096	1.58347	-1.28732	-0.664027	GO:0046983	/
BraA09g007068E	3.83	2.115	0.924	0.766	1.463	0.91	1.564	0.921	0.802	0.839	0.545	0.322	1.239	1.798	1.75	0.159	0.71	0.75	2.04635	-0.568819	1.10254	GO:0004499	K11816
BraA04g044387E	96.509	56.56	41.279	31.627	36.037	42.307	17.25	16.094	18.965	36.926	24.327	34.802	48.609	39.212	48.104	20.894	19.774	20.559	1.05308	-0.274781	-0.150846	/	/
BraA08g041011E	4.715	6.458	6.226	3.842	2.658	3.559	1.039	1.009	1.647	4.079	2.593	2.264	12.158	9.522	11.597	2.239	1.267	2.174	0.992756	-1.70803	-0.548439	GO:0004650	/
BraA03g008321E	5.537	5.226	5.421	6.127	4.683	7.039	0	2.742	1.161	4.55	40.968	18.556	0.785	5.674	1.511	2.555	16.627	7.134	-1.96162	1.18601	-2.64049	/	/
BraA09g004185E	25.906	5.252	4.893	18.602	110.06	46.274	39.935	183.192	82.773	2.947	1.917	4.01	6.687	20.058	9.493	48.438	0.339	1.796	2.06247	2.34225	2.67704	/	/
BraA03g011335E	25.309	10.225	27.704	14.599	18.345	30.855	26.025	16.093	29.191	33.949	51.892	77.522	17.478	25.682	15.694	29.88	24.536	17.659	-1.33995	0.151164	0.0530374	/	/
BraA08g040007E	5.31	1.65	2.441	1.981	20.378	6.465	1.755	18.454	6.275	0.465	0.655	1.353	2.583	2.483	2.468	2.882	0.459	0.357	1.96275	2.01347	2.93427	/	/
BraA06g022026E	10.701	4.204	3.928	23.127	30.452	17.96	61.094	87.542	63.092	2.386	2.031	2.754	5.557	9.544	15.813	47.788	5.481	14.233	1.42926	1.24861	1.72279	GO:0005515	/
BraA03g009031E	2.02	1.675	0.945	1.123	4.44	1.795	0.521	3.696	1.512	0.751	0.761	0.641	0.839	0.695	1.051	0.98	0.785	0.9	1.14113	1.5727	1.20477	GO:0005515	/
BraA05g014163E	5.389	3.185	2.303	0.908	1.248	0.508	1.179	0.257	0.518	1.553	1.196	0.824	0.818	0.92	1.059	0.571	1.533	1.212	1.64037	-0.0388815	-0.688633	/	/
BraA01g024656E	21.605	8.918	14.754	85.349	155.127	107.337	70.521	212.984	179.651	4.736	5.153	9.409	11.076	25.864	29.393	97.207	17.534	36.59	1.26353	2.4382	1.69172	GO:0003700	K09286
BraA08g039670E	5.312	6.372	22.671	11.543	14.797	11.856	7.276	6.478	7.791	3.774	3.509	4.271	3.622	4.72	4.528	4.642	5.054	5.518	1.59664	1.6031	0.578504	GO:0016021	K01535
BraA03g010395E	7.884	4.247	7.698	3.066	9.638	5.154	9.759	5.984	4.878	2.672	0.829	2.815	3.646	3.48	4.234	7.264	5.515	3.721	1.68654	0.706798	0.396695	/	/
BraA03g012597E	3.699	3.126	3.341	4.32	2.989	7.271	0.855	2.477	2.7	1.596	1.744	1.802	1.726	3.267	1.972	1.146	3.152	1.956	1.01433	1.08972	0.0336711	/	K10666
BraA06g020858E	4.308	3.356	8.25	7.581	9.649	10.158	6.887	10.219	11.626	13.073	13.747	8.895	7.515	6.908	8.429	10.998	8.29	11.423	-1.13951	0.294426	-0.0179444	GO:0016020	/
BraA09g004734E	41.929	38.273	28.907	12.706	18.694	14.985	29.027	35.257	26.955	26.39	20.963	22.783	26.861	27.007	45.364	18.651	21.437	14.417	0.670984	-1.05837	0.825726	/	/
BraA07g033536E	8.745	10.482	13.215	26.609	11.934	26.08	4.936	7.015	15.106	16.603	17.807	18.316	25.299	19.949	18.924	19.518	36.452	24.083	-0.67149	0.0173891	-1.49094	GO:0009733	K14488
BraA10g046036E	6.338	3.618	2.092	0.977	2.772	2.338	0.369	0.413	0.152	1.649	0.594	1.626	2.584	3.008	2.143	0.179	0.566	0.248	1.67823	-0.29621	0.00223673	GO:0005622	/
BraA05g015730E	12.929	19.083	28.825	23.357	33.251	44.044	11.479	21.247	25.685	33.316	56.614	39.462	60.853	33.986	32.763	26.129	66.307	39.639	-1.06361	-0.308375	-1.09313	/	/
BraA06g019462E	0.07	0.07	0.07	0.07	0.284	0.144	0.144	0.146	0.295	0.558	0.204	3.306	0.279	0.071	0.209	0.209	0.069	0.069	-4.24317	-0.120497	0.824708	/	/
BraA06g018925E	1.487	1.64	0.461	1.889	1.592	9.089	1.18	0.88	1.816	2.329	3.463	7.157	0.115	0.391	0.19	1.484	8.404	1.735	-1.81641	4.21454	-1.50673	/	/
BraA02g030128E	6.155	2.453	1.059	0.202	0.357	1.297	0	0.053	0.053	0.701	0.098	0.858	0.752	2.153	0.798	0.05	0.049	0.149	2.58803	-0.956875	/	/	/
BraA10g046360E	0.849	1.05	0.453	1.01	2.596	3.314	5.257	1.049	0.74	2.551	2.049	1.815	2.653	3.276	2.491	2.095	3.062	2.719	-1.41405	-0.236592	-0.0901281	GO:0046983	/
BraA08g041291E	0.434	0.52	0.262	0.614	0.618	1.438	0.358	0.455	0.551	1.563	2.117	1.4	1.477	0.8	1.038	0.692	1.457	0.772	-2.03212	-0.286444	-1.02051	/	/
BraA09g000790E	25.807	26.624	15.166	12.865	13.647	12.352	7.395	8.042	9.199	11.753	7.657	15.101	24.066	16.48	20.688	7.29	7.927	7.049	1.00528	-0.629759	0.223506	GO:0030001	/
BraA06g020442E	61.667	12.294	25.295	10.726	97.631	42.059	8.345	12.157	10.714	7.967	6.994	16.193	20.245	19.929	16.973	5.781	8.826	7.349	1.70825	1.47024	0.591516	GO:0008168	/
BraA01g024820E	1.513	1.513	3.879	0.521	1.751	1.247	1.383	0.613	1.274	0.757	0.907	0.763	1.723	1.409	1.166	1.373	1.631	0.987	1.53368	-0.237455	-0.217021	/	/
BraA05g015881E	0.416	0.832	0.335	0.589	0.339	0.431	0.429	0.436	0.088	1.582	2.599	1.93	1.167	1.704	1.327	1.328	1.397	1.234	-1.91917	-1.60957	-1.96788	GO:0005509	K13448
BraA02g029372E	1.987	0.852	1.716	0.072	0.651	0.662	0.146	0.298	0.376	0.426	0.208	0.43	0.711	0.582	1.062	0.142	0.281	0.07	2.13343	-0.710407	0.814094	/	/
BraA09g004820E	1.793	4.69	0.278	0.139	0.492	0.143	1.138	3.112	1.022	0.207	0.337	0.278	0.898	1.272	3.919	1.721	1.636	0.955	3.07265	-2.92085	0.384387	GO:0048364	/
BraA01g025750E	81.978	46.629	513.136	51.644	157.232	106.628	41.838	176.289	204.04	34.928	17.505	21.482	66.213	22.549	36.804	22.785	42.558	53.54	3.14207	1.38118	1.9152	GO:0004553	/
BraA09g001111E	194.76	81.422	327.192	390.359	225.83	583.383	913.787	365.343	688.713	406.116	523.438	594.568	110.571	110.896	83.342	679.793	1271.66	467.977	-1.31011	1.99372	-0.227847	GO:0000786	K11275
BraA05g014706E	2.107	0.949	0.955	0.905	0.805	1.147	0.163	0.111	0.223	0.211	0.36	0.425	1.531	0.702	0.998	0.368	0.26	0.678	2.0424	-0.156394	-1.32232	GO:0016491	/
BraA10g045110E	0.757	0.555	0.457	0.561	1.901	2.248	0	0.424	0.374	1.515	1.675	1.629	0.859	1.034	1.408	0.252	0.698	0.649	-1.41372	0.565887	-0.912921	GO:0004601	K00430
BraA10g046873E	7.053	5.962	12.273	12.05	12.218	18.959	13.151	10.531	15.129	12.99	23.685	16.975	10.13	11.4	7.071	14.759	27.029	15.638	-1.05982	0.62364	-0.488831	GO:0006629	/
BraA09g005450E	28.519	22.253	29.235	34.233	66.31	34.376	17.777	34.436	32.214	20.697	19.834	18.384	22.916	20.082	20.788	20.583	23.013	26.493	0.472211	1.1251	0.35282	GO:0005516	K01537
BraA02g030679E	2.902	0.968	2.728	11.227	48.873	25.102	17.881	109.411	69.653	0.891	0.756	0.469	1.667	1.506	1.736	29.043	1.109	1.799	1.67149	4.18077	2.70181	GO:0004672	/
BraA05g015138E	1.242	0.828	1.251	1.999	5.153	4.194	0.285	1.351	2.774	3.223	3.144	1.763	3.226	2.309	1.926	1.377	0.682	3.003	-1.26219	0.651608	-0.125399	GO:0016020	K14709
BraA10g045078E	0.27	0.811	0.855	1.015	1.022	1.96	0.438	0.729	1.021	2.357	1.998	1.441	2.011	1.345	2.348	1.04	2.403	2.1	-1.55356	-0.484151	-1.26135	GO:0003677	/
BraA04g044359E	15.157	13.24	22.904	21.887	14.813	35.176	24.875	13.969	21.722	25.74	28.225	33.628	12.428	14.081	9.945	21.211	38.423	29.996	-0.743093	1.00052	-0.491476	/	/
BraA06g023550E	5.216	3.997	4.242	1.234	2.242	0.818	2.049	1.281	0.608	1.365	3.201	2.004	1.151	1.544	1.241	1.648	1.845	1.918	1.06185	0.167112	-0.377751	/	/
BraA08g039781E	20.744	7.001	9.87	54.863	77.069	68.106	81.191	123.979	109.051	2.3	1.753	7.207	6.474	22.026	19.971	77.239	7.946	18.928	1.77694	2.08584	1.66442	/	/
BraA06g020270E	0.968	0.138	8.641	0.14	0.493	0.358	0.143	0.363	0.146	0.277	0.338	0.07	0.139	0.213	0.483	0.552	0.205	0.479	3.8476	0.300488	-0.837981	/	/
BraA09g003792E	1.621	1.967	1.82	2.552	7.552	5.949	2.659	2.706	1.997	5.587	4.36	2.226	9.107	7.296	7.314	2.149	5.332	4.812	-1.13945	-0.510905	-0.654112	GO:0004252	/
BraA06g023443E	21.403	23.048	11.161	15.211	10.645	9.656	10.91	14.669	13.258	11.723	6.209	8.83	18.799	14.254	23.667	12.693	7.591	10.651	1.09149	-0.660069	0.407137	/	/
BraA06g020942E	71.609	17.111	41.332	231.646	372.298	325.478	366.846	521.4	485.896	9.484	13.004	23.323	23.27	84.517	71.414	326.668	44.941	89.551	1.53868	2.41922	1.6458	/	K12581
BraA03g013140E	2.389	1.962	1.769	2.863	1.144	1	0.832	2.458	2.478	1.378	0.649	1.086	2.727	2.026	3.029	2.527	1.736	2.52	1.01104	-0.641147	-0.151599	GO:0005515	/
BraA01g027578E	2.463	2.899	3.941	4.394	6.199	13.814	4.11	5.095	5.597	4.787	6.579	9.869	2.831	3.117	3.179	3.471	4.941	3.584	-1.16182	1.45803	0.382496	GO:0016021	K15382
BraA01g024934E	3.016	3.147	1.635	4.022	3.526	7.398	1.541	1.553	2.523	4.069	5.007	6.363	2.735	3.09	2.349	3.455	4.5	4.676	-0.95241	0.897811	-1.09413	/	K04125
BraA03g012584E	2.391	2.157	0.987	1.11	0.24	0.203	0.04	0.617	0.124	0.432	0.766	0.712	0.471	1.807	1.642	0.43	0.581	1.008	1.56772	-1.35252	-1.26201	GO:0004143	K00901
BraA07g036074E	43.549	41.222	7.932	54.381	73.137	63.644	50.152	82.12	106.749	101.026	182.414	162.73	181.676	166.498	81.725	272.084	399.351	254.671	-2.23267	-1.13817	-1.87419	GO:0016491	K10534
BraA08g039510E	4.138	0.794	1.979	1.395	1.746	1.473	9.788	2.852	8.803	0.879	0.245	0.38	8.461	3.212	4.335	10.264	5.454	12.325	2.23999	-1.7683	-0.32524	GO:0003824	/
BraA06g023100E	1.097	1.441	3.109	2.912	1.886	5.899	4.881	1.152	2.468	3.57	5.625	6.92	1.237	1.616	1.094	3.149	10.709	3.393	-1.48748	1.46198	-0.94962	/	/
BraA06g019719E	4.118	4.855	6.223	8.03	13.485	14.938	22.759	10.807	14.943	9.13	13.502	9.351	10.612	7.836	7.481	19.527	14.247	11.352	-1.04637	0.528777	0.173714	/	/
BraA04g041440E	1.054	0.856	0.265	5.259	5.5	14.468	16.031	3.594	7.526	4.219	1.093	4.917	0.66	1.214	0.985	5.85	6.639	7.167	-2.19329	3.17685	0.532034	GO:0006950	/
BraA09g002749E	2.224	1.625	2.039	1.819	3.946	1.735	1.392	6.033	5.475	1.126	1.196	0.908	1.302	1.536	0.773	1.422	1.359	1.385	0.896529	1.09955	1.71764	GO:0006629	/
BraA09g002095E	1.124	0.529	0.733	1.136	0.741	3.358	0.341	0.347	0.77	2.449	3.1	1.668	1.657	1.423	0.923	0.594	3.333	1.374	-1.56688	0.412051	-1.78516	/	/
BraA02g028521E	0.134	0.034	0.101	0.17	0.547	0.139	0.415	0.176	0.213	0.538	0.557	0.406	0.336	0.241	0.368	0.301	0.663	0.664	-2.44891	-0.091974	-0.939532	GO:0003700	/
BraA01g024555E	186.219	169.891	214.928	103.903	125.313	60.907	146.75	198.775	210.64	93.37	145.509	137.094	263.978	245.929	228.229	323.385	170.863	319.282	0.631551	-1.3188	-0.471371	GO:0003824	/
BraA04g044594E	5.128	1.759	3.493	5.629	7.114	15.943	0.101	1.538	4.031	8.703	8.394	6.949	7.684	6.154	4.335	1.999	11.199	5.944	-1.1799	0.692429	-1.67756	/	/
BraA08g038730E	2.637	2.808	2.999	3.483	2.253	3.527	1.009	3.215	3.061	1.746	0.914	1.545	2.089	1.569	2.375	1.189	1.556	1.347	1.0397	0.635601	0.917691	/	/
BraA07g035623E	1.272	1.084	1.804	2.287	0.96	1.172	5.784	1.335	2.842	2.17	3.497	4.232	2.691	1.883	0.987	5.926	6.846	6.061	-1.22242	-0.334182	-0.852169	GO:0016020	/
BraA03g009939E	0.666	0.289	0.537	0.764	3.123	2.463	0.046	1.842	2.656	1.401	1.15	1.076	0.534	0.501	0.354	0.222	1.295	0.396	-1.24922	2.24932	1.33705	GO:0003824	K01115
BraA06g020299E	11.971	7.047	18.623	28.364	15.928	33.127	30.117	21.712	28.14	23.767	28.353	24.9	7.59	11.014	8.081	31.825	38.959	39.686	-1.00557	1.5521	-0.390862	GO:0004518	/
BraA02g029026E	13.843	13.1	5.654	12.294	20.677	20.455	12.351	18.557	13.067	27.626	26.035	18.689	41.524	43.988	57.088	15.499	43.454	36.189	-1.11611	-1.37482	-1.02361	/	/
BraA07g036918E	2.095	0.291	0.323	3.148	10.11	2.805	7.866	25.233	12.228	0.146	0.142	0.088	0.292	2.773	0.668	9.442	0.201	0.259	2.88666	2.16676	2.27226	GO:0004672	/
BraA08g038658E	23.398	5.164	5.788	56.151	133.427	99.588	137.177	267.192	187.532	1.084	1.708	4.874	7.093	24.997	24.663	139.805	6.255	26.036	2.20205	2.40414	1.85531	/	/
BraA06g021805E	1.239	0.539	2.007	3.539	8.009	17.58	73.659	1.752	0.684	6.362	4.575	2.119	3.292	5.517	4.833	4.085	16.234	4.582	-1.7581	1.14304	1.67681	GO:0016021	K15382
BraA03g008867E	14.453	13.95	6.086	12.215	3.106	5.149	2.213	12.089	6.573	31.654	19.849	23.188	31.626	49.457	36.878	17.865	57.255	47.82	-1.07863	-2.53957	-2.45671	/	/
BraA09g001853E	131.712	51.969	69.748	376.366	336.896	389.495	553.966	827.562	755.971	32.755	31.368	55.183	57.351	167.312	152.321	548.313	81.171	136.706	1.12149	1.57637	1.55119	/	/
BraA07g036926E	7.272	33.015	2.818	13.181	1.446	4.103	0.266	8.175	10.383	0.388	1.387	2.345	19.059	38.531	21.584	27.231	13.865	13.369	3.41946	-2.11141	-1.45375	GO:0016020	/
BraA06g019845E	53.029	19.744	23.284	45.002	37.248	40.695	40.774	46.287	60.027	13.104	13.594	17.611	10.462	19.051	22.014	30.174	12.629	20.609	1.15109	1.27889	1.28589	/	/
BraA04g043239E	29.613	19.923	93.423	27.926	25.315	30.153	8.932	38.537	43.163	19.506	8.456	18.262	23.602	25.816	26.942	24.72	21.311	29.731	1.65677	0.151593	0.342011	/	/
BraA03g009568E	8.887	2.805	4.69	53.375	117.691	59.101	96.97	296.402	208.939	1.112	2.841	1.441	3.075	7.75	7.966	108.777	3.19	9.16	1.6312	3.66724	2.38764	GO:0003700	/
BraA03g009514E	3.892	2.8	2.132	6.213	13.563	8.987	2.817	11.968	7.154	0.615	0.6	1.654	1.984	3.008	4.358	2.385	0.877	1.892	1.65735	1.67142	2.17929	GO:0000079	/
BraA04g041476E	9.084	1.456	2.523	11.304	21.059	11.527	31.418	57.703	36.239	0.758	1.365	0.999	1.634	7.935	3.136	25.054	2.302	4.61	2.09893	1.83411	2.0467	GO:0003700	/
BraA09g004965E	3.827	6.029	4.241	6.287	3.703	6.742	8.487	5.423	8.201	8.62	14.295	7.723	11.313	8.528	8.777	8.308	10.402	10.697	-1.09212	-0.759435	-0.337054	/	/
BraA02g029885E	4.512	4.885	13.261	3.112	2.595	1.815	11.115	2.73	1.629	2.444	3.784	2.142	1.808	3.263	2.541	2.967	3.83	3.151	1.45938	0.00398938	0.708331	GO:0008152	/
BraA08g041238E	2.043	2.422	2.515	3.06	2.389	2.588	2.81	1.668	2.082	5.909	3.621	4.886	4.17	3.643	3.848	4.305	3.291	3.07	-1.01377	-0.517172	-0.62736	/	/
BraA04g041715E	0.614	0.567	0.666	0.334	14.913	0.832	0.779	21.91	12.295	0.047	0.092	0.191	0.426	0.387	0.471	0.377	0.187	1.075	2.51716	3.74294	4.5165	GO:0004553	/
BraA03g008004E	25.821	3.799	10.711	86.764	155.331	147.362	167.481	248.187	214.426	0.845	1.895	5.62	5.074	31.211	24.068	144.795	10.926	30.143	2.30594	2.73812	1.83108	/	/
BraA10g047622E	6.051	5.423	5.884	16.867	24.957	20.513	20.158	39.126	34.913	2.566	3.612	4.241	4.59	6.717	7.208	28.692	4.444	5.406	0.766883	1.79059	1.36164	GO:0005515	/
BraA03g008809E	13.469	10.258	18.734	20.159	16.166	35.004	31.273	26.311	30.878	21.063	23.129	31.988	8.278	12.424	9.131	28.271	32.499	25.125	-0.814042	1.28394	0.118767	GO:0003700	/
BraA09g000602E	25.862	13.195	24.178	31.325	18.442	62.454	26.359	7.818	23.649	28.535	47.334	47.969	9.641	19.821	9.749	28.243	47.037	34.906	-0.940391	1.53968	-0.863987	GO:0044238	/
BraA06g023198E	11.254	16.03	15.95	12.054	34.589	9.391	11.118	76.389	64.2	4.966	8.756	9.336	9.367	7.231	3.9	9.521	12.821	10.098	0.93509	1.5028	2.31668	GO:0010112	/
BraA09g005131E	18.036	15.902	19.608	27.093	55.323	44.741	58.272	91.334	67.043	22.146	27.913	26.242	21.412	23.922	20.794	48.513	29.661	25.732	-0.481357	0.989167	1.14154	GO:0004252	/
BraA02g031776E	6.543	3.07	3.27	21.591	31.004	18.926	32.129	67.488	46.706	1.752	1.437	2.662	2.465	7.25	7.057	36.609	4.011	8.508	1.17447	2.13252	1.65041	/	/
BraA02g030282E	64.669	91.839	50.26	68.625	47.478	97.498	33.074	33.49	53.216	98.256	115.777	154.983	198.34	207.591	156.359	155.103	197.1	197.7	-0.803558	-1.37652	-2.12376	/	/
BraA07g036614E	32.539	15.393	19.852	100.047	67.101	78.794	89.47	110.703	123.784	9.378	8.494	15.651	15.055	44.369	38.455	106.368	24.528	48.026	1.05006	1.34722	0.927227	GO:0005509	K13448
BraA03g012619E	1.309	1.851	1.273	1.597	1.057	1.029	3.724	1.705	2.149	2.711	7.36	2.55	2.985	2.45	2.115	4.369	6.111	3.572	-1.48394	-1.02057	-0.816912	GO:0003677	/
BraA06g021988E	25.275	28.532	18.226	38.627	34.638	35.682	9.222	46.751	55.472	34.043	36.845	42.851	90.492	79.054	56.463	91.202	71.005	90.195	-0.62662	-1.03228	-1.09731	/	/
BraA03g007316E	6.864	5.297	3.721	7.204	7.125	9.315	3.945	4.391	5.915	10.406	9.193	8.279	9.236	10.147	10.072	7.961	18.221	9.638	-0.778105	-0.289883	-1.2499	GO:0005381	K14685
BraA06g019631E	24.955	23.554	27.17	25.696	41.754	27.445	13.094	73.056	46.548	17.003	21.73	18.096	14.884	17.282	16.534	24.796	19.887	18.314	0.442601	1.00261	1.16721	GO:0048544	/
BraA08g038322E	75.42	59.624	26.98	17.985	25.009	16.395	11.105	17.088	10.907	29.968	20.386	29.411	61.636	60.394	46.15	29.617	18.491	26.89	1.05911	-1.46896	-0.855925	GO:0006950	/
BraA08g038347E	5.174	0.863	2.878	12.315	17.953	15.864	19.626	37.677	25.44	0.27	0.158	1.197	1.566	7.841	5.697	25.07	1.758	4.8	2.49451	1.65232	1.46168	/	/
BraA03g008589E	2.548	3.725	3.751	4.557	9.902	4.915	3.76	12.137	4.646	2.276	1.263	1.701	3.142	3.092	6.45	2.23	2.015	2.211	0.968042	0.662364	1.76706	/	/
BraA05g014318E	11.897	19.278	133.809	6.72	13.599	6.657	22.299	27.674	31.449	2.405	10.528	4.678	9.068	6.009	4.233	10.761	8.834	9.672	3.24204	0.523701	1.55361	GO:0004568	K01183
BraA01g027255E	8.413	4.36	5.793	19.216	33.358	35.444	14.112	47.143	41.127	2.969	2.483	3.909	4.003	6.76	7.908	17.28	5.923	8.145	1.02175	2.28218	1.78822	/	/
BraA01g025354E	1.574	1.866	0.411	1.473	2.909	2.477	4.149	3.181	2.036	4.377	4.155	2.941	6.542	5.434	6.22	1.862	4.724	4.845	-1.5404	-1.36878	-0.203013	GO:0004553	K08235
BraA06g022370E	160.057	59.45	20.133	5.43	24.036	16.333	1.726	2.218	1.211	2.909	1.72	18.213	47.731	44.381	57.071	1.758	1.915	3.136	3.43265	-1.64145	-0.31608	/	/
BraA07g033595E	1.584	3.018	5.264	6.854	3.818	7.153	7.041	5.693	7.191	5.872	8.436	7.779	2.382	3.106	2.598	9.383	11.776	6.346	-1.13796	1.15452	-0.389785	GO:0005515	/
BraA09g001425E	36.621	46.518	43.537	23.455	20.023	13.643	13.206	24.813	24.936	31.59	35.235	28.291	41.935	43.669	40.339	25.662	28.606	32.706	0.443038	-1.12236	-0.383181	GO:0004553	/
BraA09g001264E	1.611	1.376	1.825	1.594	1.094	1.426	0.865	0.81	1.03	2.486	3.9	2.709	1.547	1.547	1.405	1.608	3.35	2.225	-0.890451	-0.111023	-1.32969	/	K01193
BraA06g022003E	32.106	38.704	38.304	32.851	10.39	15.101	11.463	11.019	14.287	21.705	31.339	24.233	18.594	33.597	28.553	19.012	33.02	34.41	0.526304	-0.476958	-1.15458	/	/
BraA03g008946E	7.116	7.18	13.051	16.664	9.913	16.452	10.164	15.067	14.097	12.483	19.899	20.929	4.815	8.475	6.672	14.875	20.26	13.782	-0.936507	1.1241	-0.232269	/	K09422
BraA04g043244E	12.162	9.83	8.527	14.165	31.27	24.302	29.257	42.843	33.054	14.173	18.054	15.218	23.693	22.13	21.249	23.212	17.214	13.238	-0.605366	0.103232	1.05195	/	/
BraA03g007945E	4.338	3.693	7.392	3.593	11.33	5.261	7.189	10.173	7.571	2.772	2.975	1.956	4.902	4.965	3.958	2.442	4.014	2.192	1.02871	0.601236	1.61295	GO:0008375	/
BraA06g022062E	2.249	2.461	2.337	13.006	11.529	10.637	1.088	10.257	20.087	4.188	3.536	3.547	4.508	3.097	3.4	3.017	5.906	4.869	-0.645811	1.69652	1.26688	/	/
BraA07g037649E	6.032	8.024	6.982	2.79	1.765	0.998	0.132	1.482	1.63	1.735	4.888	1.295	2.894	5.523	7.039	1.409	2.41	3.492	1.43363	-1.46345	-1.08548	GO:0003676	/
BraA05g013998E	2.495	0.755	17.651	9.561	15.308	11.545	43.511	40.742	24.377	0.697	1.53	1.23	2.442	2.972	1.504	20.444	5.448	3.904	2.61368	2.4339	1.93921	/	K09422
BraA09g006746E	17.678	13.629	20.225	34.022	71.582	62.013	20.073	63.871	57.778	25.72	22.795	26.423	23.588	25.029	21.033	25.446	35.901	26.79	-0.509491	1.31331	0.773174	GO:0006952	K08472
BraA05g014646E	0.752	0.338	2.158	0.646	19.755	1.636	7.521	16.135	8.591	0.339	0.147	0.152	0.866	0.963	0.6	2.138	0.892	0.335	2.37769	3.27366	3.34504	GO:0003700	K13424
BraA02g030523E	37.323	20.801	43.286	68.037	55.769	101.145	41.141	23.468	61.379	45.967	68.261	71.516	24.073	41.216	18.226	55.905	78.5	68.98	-0.844587	1.45314	-0.622763	GO:0003824	K16055
BraA06g020049E	7.105	5.346	7.318	9.448	27.776	20.664	19.28	35.81	22.558	8.843	10.283	10.399	11.994	10.165	7.628	14.184	14.361	8.202	-0.548563	1.01056	1.16645	GO:0004672	/
BraA04g041824E	43.77	37.523	51.278	59.111	46.621	101.394	27.243	27.285	42.813	57.527	58.7	69.384	32.601	35.072	29.488	32.474	52.148	38.874	-0.455315	1.11707	-0.267345	GO:0008152	K12657
BraA09g002991E	133.853	85.086	100.928	33.46	33.17	54.361	14.891	43.693	59.071	130.237	206.262	193.097	116.468	89.497	119.216	49.738	107.986	85.257	-0.696989	-1.39685	-0.962628	GO:0016020	/
BraA03g008054E	37.145	29.082	56.316	50.396	83.458	63.263	28.455	90.08	78.491	26.092	27.244	23.947	31.192	28.074	29.138	31.199	32.852	30.473	0.693357	1.19713	1.14669	GO:0016757	/
BraA09g000333E	27.218	23.84	26.637	65.12	89.131	66.465	54.521	72.959	86.978	21.527	16.659	21.039	31.23	29.033	37.617	48.787	35.441	32.651	0.423834	1.209	0.951682	GO:0005524	/
BraA08g039970E	2.594	2.047	2.468	4.342	5.138	6.602	4.817	6.444	7.474	4.155	3.265	3.868	3.264	2.835	3.507	2.733	3.732	3.08	-0.63501	0.775133	1.05232	GO:0003677	/
BraA03g007391E	5.564	4.032	5.569	8.005	4.505	7.762	5.077	3.781	7.059	5.856	11.146	11.373	2.502	4.349	2.917	6.373	11.493	7.446	-0.875195	1.06774	-0.595599	GO:0046856	/
BraA08g040397E	3.731	2.205	4.271	9.43	6.841	8.612	4.513	5.198	7.789	1.256	1.325	2.327	1.19	2.016	1.759	4.503	5.196	3.054	1.08719	2.3456	0.531378	GO:0003677	K09287
BraA01g027835E	3.105	3.256	3.374	3.839	11.867	3.486	4.658	21.921	13.376	2.295	2.609	2.422	3.805	2.959	2.881	5.509	3.834	2.952	0.440281	1.04919	1.79136	GO:0005524	/
BraA09g001468E	8.065	2.452	4.088	14.617	36.779	21.541	25.114	61.661	48.955	1.36	1.989	2.841	2.041	8.807	4.278	41.181	3.274	4.916	1.27181	2.32376	1.53166	GO:0043531	/
BraA07g035769E	8.571	7.471	8.312	10.643	17.209	11.832	14.308	22.959	17.616	6.231	5.592	6.317	5.346	6.887	6.881	14.982	6.222	6.264	0.456672	1.09427	1.07745	GO:0004672	K13436
BraA08g040346E	6.618	8.568	8.478	5.147	5.369	3.538	2.842	5.501	4.501	6.266	5.44	5.168	20.978	12.519	13.798	7.563	7.726	7.379	0.518388	-1.7278	-0.735451	GO:0004345	K00036
BraA02g031296E	59.894	50.346	109.095	242.383	99.752	245.468	240.013	153.926	271.257	110.756	130.18	155.444	72.348	88.549	62.778	232.169	296.726	217.972	-0.826353	1.39998	-0.0956726	/	/
BraA03g009263E	2.24	1.429	1.089	3.124	7.081	2.882	11.952	17.148	8.011	0.464	0.792	0.701	0.735	1.543	1.579	8.443	0.992	1.337	1.31314	1.81404	1.86083	GO:0008152	/
BraA09g005772E	38.704	41.115	28.029	26.815	22.801	24.791	42.733	32.775	32.827	68.59	54.49	45.383	65.394	46.411	91.056	34.444	37	38.21	-0.610319	-1.42325	0.0596449	GO:0003677	/
BraA02g033192E	10.268	11.662	12.543	13.441	6.064	6.015	10.849	10.935	12.81	13.906	23.303	18.021	13.621	20.533	17.315	18.817	17.701	21.058	-0.65207	-1.01129	-0.658118	GO:0046983	/
BraA07g037197E	11.706	10.166	17.545	22.437	12.328	23.223	21.263	15.907	23.639	17.581	22.129	25.874	7.557	10.412	7.091	16.597	25.698	21	-0.706186	1.22331	0.0173125	/	/
BraA05g018144E	23.679	6.589	12.767	71.989	114.833	95.832	127.296	206.983	186.721	2.671	3.501	8.75	7.854	29.13	26.608	125.009	15.082	27.638	1.56262	2.19662	1.7061	/	/
BraA02g029696E	1.727	0.484	2.019	1.816	6.828	7.376	1.568	3.046	2.779	0.277	0.135	0.488	1.108	1.487	1.171	0.621	1.093	0.684	2.26771	2.14473	1.70836	/	/
BraA01g024217E	7.438	3.583	6.661	4.596	6.314	5.139	8.242	5.784	5.102	13.239	12.645	9.591	21.948	37.117	24.726	8.937	26.005	22.898	-0.97393	-2.35212	-1.51411	/	/
BraA01g024902E	79.307	33.886	47.023	39.858	113.502	78.062	44.455	70.961	55.122	24.278	32.433	33.454	43.127	43.945	34.185	37.852	24.169	23.594	0.861644	0.985453	1.07566	GO:0016491	/
BraA10g045865E	7.252	3.778	4.312	4.531	38.117	24.113	16.416	42.976	29.154	1.815	2.557	3.252	2.574	6.192	3.315	12.366	3.783	3.737	1.04128	2.53806	2.23625	/	/
BraA09g005040E	142.239	77.098	90.415	155.706	227.14	195.589	261.64	365.722	292.228	63.941	68.82	66.559	96.361	114.527	106.39	214.025	96.402	94.954	0.668586	0.904124	1.25949	GO:0003677	/
BraA02g030237E	5.541	6.322	3.918	19.609	48.231	24.384	38.862	70.669	50.212	8.322	7.596	11.724	3.653	5.08	3.49	26.494	11.195	15.488	-0.775245	2.96664	1.66856	GO:0008168	/
BraA01g024159E	10.33	12.012	13.075	12.586	10.253	16.471	2.368	5.282	6.261	17.325	15.52	19.244	36.983	30.032	28.791	17.186	22.777	24.112	-0.525668	-1.2635	-2.12256	/	/
BraA09g006649E	10.724	15.979	24.841	36.995	17.618	38.002	47.136	29.213	44.722	28.166	30.536	32.01	11.807	13.271	10.394	37.506	55.391	40.654	-0.788326	1.39421	-0.0681326	GO:0005506	K00517
BraA02g031143E	0.929	0.383	0.275	2.155	17.256	4.417	2.029	48.066	29.032	0	0.107	0	0.383	0.056	0.054	1.636	0.216	0.108	3.90635	5.66041	5.41984	GO:0003700	/
BraA03g010844E	79.747	52.747	62.573	173.222	160.529	176.889	153.742	215.488	255.547	40.939	46.298	50.494	54.516	76.563	78.875	204.445	77.053	92.398	0.533705	1.30858	0.813091	GO:0003700	K09286
BraA03g008683E	4.021	4.476	3.229	2.812	2.248	3.823	2.464	0.793	2.208	2.331	1.476	2.899	1.606	1.518	1.116	0.905	0.717	1.257	0.840901	1.08924	0.990077	/	K15015
BraA04g043702E	0.701	0.701	1.201	2.126	1.214	2.688	1.012	0.809	0.964	0.842	4.382	4.244	0.843	0.503	0.21	2.029	4.92	2.428	-1.83858	1.96732	-1.67093	GO:0009507	K02721
BraA04g043531E	5.27	3.892	2.014	5.689	6.593	8.86	3.358	4.287	4.479	8.016	6.608	6.499	9.39	9.323	8.858	6.089	11.683	7.945	-0.882826	-0.351148	-1.00211	GO:0015074	/
BraA09g002096E	0.573	0.304	0.34	1.126	1.375	3.077	0.07	0.46	1.214	0.912	1.021	1.055	0.778	0.346	0.303	0.303	1.3	0.601	-1.26389	1.99808	-0.262277	GO:0005515	/
BraA05g014656E	4.165	1.816	4.034	2.429	3.209	3.376	3.635	3.026	3.164	1.069	0.417	1.94	2.675	4.759	3.301	1.919	1.214	1.426	1.5829	-0.218507	1.18385	GO:0003700	/
BraA07g037165E	47.104	10.087	19.954	167.775	303.317	234.168	314.436	525.592	441.74	6.634	9.566	13.882	17.9	68.187	57.032	279.964	25.558	68.775	1.393	2.34852	1.84761	GO:0016787	K07766
BraA02g031615E	66.607	67.39	39.778	30.929	16.064	25.038	22.904	36.614	49.066	86.959	110.205	83.002	126.103	84.66	90.959	152.308	164.657	143.864	-0.657173	-2.0593	-2.00765	/	K20858
BraA05g017683E	14.288	6.328	2.05	1.342	1.532	1.421	1.506	0.65	1.405	1.86	1.21	3.794	5.63	5.802	6.22	1.281	1.662	1.838	1.76384	-2.01278	-0.3538	/	/
BraA09g000478E	0.874	0.534	2.984	1.841	4.699	2.264	2.504	2.497	2.492	0.438	0.332	0.539	0.487	0.224	0.654	2.036	0.96	1.081	1.77298	2.74199	0.953188	/	K10664
BraA09g001745E	12.901	11.141	12.37	15.491	19.766	15.773	20.944	37.686	26.979	7.411	9.931	9.389	8.873	10.986	10.934	17.954	8.957	12.492	0.475842	0.76211	1.20207	GO:0004222	K07761
BraA03g009274E	41.919	16.316	14.312	142.124	274.216	188.023	308.781	506.149	392.418	11.978	10.817	12.922	14.143	52.814	39.242	289.089	18.061	48.093	1.05846	2.5573	1.83577	GO:0003824	/
BraA08g039190E	1.614	0.705	2.72	3.679	6.667	14.082	4.148	4.189	6.429	3.379	6.764	3.021	1.559	1.383	1.697	3.545	7.803	3.601	-1.36184	2.44051	0.0597832	GO:0004672	/
BraA09g006126E	25.739	7.993	18.801	56.2	227.844	107.237	275.766	424.738	241.547	7.085	9.364	9.503	14.069	35.552	27.035	170.51	12.298	25.3	1.0485	2.4173	2.25215	/	/
BraA01g024149E	14.917	15.047	16.275	12.891	0.946	6.543	1.724	1.364	5.11	16.174	30.104	31.231	17.368	19.47	11.481	9.577	29	18.068	-0.716601	-1.27284	-2.71899	/	/
BraA08g039578E	7.813	7.019	7.169	16.603	38.273	26.303	9.24	52.026	32.917	4.484	5.929	4.921	5.436	8.617	9.032	11.276	4.771	5.269	0.550516	1.86567	2.23217	GO:0003700	/
BraA01g026551E	10.336	1.428	2.578	24.283	102.582	55.499	33.002	203.449	108.087	0.838	1.25	1.987	3.453	7.211	4.172	46.821	1.459	2.873	1.85261	3.6834	2.83242	/	/
BraA08g039782E	32.666	9.024	16.876	84.815	90.512	123.538	134.396	149.874	167.206	2.451	3.335	13.069	15.626	34.196	39.196	115.384	19.106	43.162	1.67054	1.78191	1.41416	/	/
BraA07g036905E	0.292	0.117	1.765	0.295	11.659	0.061	1.807	2.084	1.421	0	0.114	0	0.293	0.12	0.058	0.408	0.115	0.289	4.25194	4.76575	2.79075	GO:0005515	K00799
BraA02g030508E	0.913	0.537	0.487	1.683	3.173	3.284	0.609	2.988	3.07	0.215	0.052	0.163	0.377	0.55	0.375	0.697	0.372	0.106	2.21113	2.68736	2.58512	/	/
BraA09g002305E	14.661	11.345	11.991	17.497	53.463	31.352	23.717	54.646	41.427	8.649	10.608	8.888	9.56	13.032	10.804	27.191	8.762	7.769	0.463605	1.67194	1.53329	GO:0005515	/
BraA09g002070E	27.346	12.909	96.656	16.798	17.573	9.008	56.178	34.039	32.056	7.163	11.884	12.583	10.754	7.467	5.001	11.747	20.223	8.965	2.13582	0.921881	1.65615	GO:0016491	/
BraA02g029440E	20.019	5.482	9.91	71.059	136.384	101.06	126.538	218.068	168.864	5.14	5.099	6.444	5.578	27.585	15.06	103.537	8.273	16.608	1.12025	2.72536	2.07089	/	K12581
BraA03g010861E	13.234	15.875	5.132	5.151	1.193	1.214	1.389	4.671	3.099	6.508	4.861	5.555	12.675	22.559	26.162	3.215	21.763	7.243	1.05239	-3.03884	-1.71619	GO:0016787	K06130
BraA07g037259E	3.746	0.056	0.451	24.531	91.349	32.389	92.217	228.335	113.011	0.056	0.055	0.282	0.728	8.592	2.732	78.909	0.939	5.698	3.48126	3.68575	2.41768	GO:0003700	/
BraA07g034722E	7.365	7.387	5.333	7.563	10.844	9.204	2.493	11.858	14.128	11.81	10.153	8.187	23.18	15.859	19.702	8.807	18.39	13.228	-0.553364	-1.05398	-0.418656	/	/
BraA07g037416E	13.274	9.657	9.401	19.683	42.86	24.554	34.938	82.121	50.574	7.047	8.289	7.347	6.933	14.589	9.387	40.955	6.799	7.721	0.542809	1.54383	1.67401	/	/
BraA03g012123E	12.807	17.987	18.478	15.948	2.138	0.562	2.314	4.329	4.174	7.498	13.144	10.989	0.906	6.969	3.355	7.187	10.37	8.234	0.666833	0.685296	-1.1702	GO:0004553	K05350
BraA08g040963E	13.611	11.615	15.696	23.689	101.192	38.823	39.166	203.056	90.063	8.905	11.252	10.151	6.102	15.811	9.496	42.458	6.756	8.477	0.462311	2.44836	2.61363	GO:0006855	K03327
BraA08g038039E	15.084	7.382	12.631	38.688	32.196	36.343	35.096	46.542	53.423	4.773	7.27	7.71	7.067	18.6	19.667	41.066	11.231	19.643	0.859465	1.2676	0.980405	/	/
BraA01g027201E	3.662	2.697	1.717	3.034	2.41	3.453	2.151	1.869	2.8	5.271	4.57	4.312	3.849	4.717	5.327	4.24	7.265	4.757	-0.7751	-0.619765	-1.17743	GO:0005737	/
BraA07g035932E	43.088	35.785	48.42	52.723	124.147	93.409	49.65	67.641	61.456	52.996	63.375	54.839	51.032	43.398	39.15	54.232	87.337	50.113	-0.398211	1.06513	-0.0170131	GO:0005524	/
BraA03g012390E	0.224	0.77	0.065	0.486	0.718	0.764	1.19	0.505	0.543	1.733	1.471	0.906	1.767	1.445	2.685	0.48	1.236	1.269	-1.92285	-1.54868	-0.337729	/	/
BraA10g046826E	4.72	3.755	4.526	2.587	3.012	3.3	5.045	2.746	3.069	2.961	2.444	2.927	8.434	7.516	8.506	2.554	2.698	4.501	0.674084	-1.43108	0.230302	/	/
BraA07g033278E	7.603	11.758	5.887	5.035	3.213	2.89	3.939	3.973	3.654	5.152	5.447	5.026	6.355	8.3	9.006	4.474	3.577	5.486	0.72417	-1.07299	-0.148297	GO:0004553	K19355
BraA07g036143E	107.132	83.943	73.342	110.726	113.101	158.193	318.41	89.859	85.952	47.441	69.201	66.818	42.831	64.883	47.506	175.105	118.612	83.839	0.558585	1.32897	0.453964	GO:0006950	/
BraA09g004253E	157.167	128.945	472.668	680.176	258.935	839.526	886.291	330.17	845.767	619.539	847.253	843.484	114.492	114.405	72.765	741.331	1315.08	857.891	-1.58244	2.5668	-0.431048	/	/
BraA05g017158E	2.929	0.496	0.454	6.424	23.915	12.142	29.006	76.577	42.11	0.18	0.352	0.318	0.406	0.923	1.348	21.725	0.312	0.803	2.22456	4.05278	2.76776	GO:0005622	/
BraA03g010521E	46.292	34.501	33.809	26.995	20.84	15.566	15.302	34.936	28.062	31.466	20.583	28.472	41.188	50.787	42.376	24.648	37.968	37.092	0.54332	-1.06774	-0.259935	GO:0006855	/
BraA01g025380E	0.505	1.553	1.236	1.679	0.993	3.404	0.819	0.341	0.688	0.976	4.124	5.063	2.532	2.108	0.828	4.792	3.96	2.679	-1.59957	0.170016	-2.5589	GO:0005515	/
BraA10g045717E	21.85	8.823	18.551	56.795	52.633	61.001	41.844	60.864	76.147	6.921	8.749	11.807	10.013	23.568	20.365	59.189	17.848	27.656	0.872153	1.68756	0.843819	/	/
BraA07g034842E	1.361	1.803	1.856	1.174	2.774	2.2	2.148	1.387	1.102	3.608	2.659	2.465	6.26	4.431	5.511	2.638	2.256	2.893	-0.767811	-1.35379	-0.670002	GO:0004619	K01834
BraA03g011200E	7.747	1.897	6.822	27.385	78.641	29.42	66.95	209.433	115.816	1.844	2.54	2.515	3.854	9.047	6.861	71.868	3.266	8.684	1.28495	2.83523	2.3045	/	K09422
BraA10g046778E	3.532	2.963	22.784	9.503	65.171	18.598	5.407	14.292	12.782	2.453	3.616	2.702	5.652	1.518	2.386	2.559	2.252	2.029	1.75882	3.35578	2.33173	GO:0004601	K00430
BraA01g025080E	0.7	1.12	1.297	1.556	5.361	3.858	3.176	8.08	5.154	1.513	3.144	1.836	1.795	1.95	1.228	2.459	2.241	2.077	-1.03365	1.17021	1.36472	GO:0004672	/
BraA08g039896E	14.058	10.391	2.816	2.741	2.592	2.637	1.291	1.576	1.236	3.174	3.219	5.01	10.493	7.993	8.944	2.374	3.794	2.27	1.29482	-1.76013	-0.957216	/	/
BraA03g013001E	0.815	1.876	0.493	4.04	44.357	1.099	0.084	62.482	52.988	0.408	0.08	0.082	0.49	0.084	0.163	0	0.161	0.403	2.52043	6.15134	7.77591	/	K13449
BraA04g043087E	91.663	82.264	64.542	59.759	42.277	61.549	13.694	31.828	52.574	96.461	141.789	112.313	123.016	123.84	93.226	78.529	115.535	95.75	-0.525117	-1.03901	-1.48497	/	/
BraA03g010691E	2.6	3.082	3.901	1.2	0.633	0.322	0.642	0.89	0.748	1.783	2.319	2.139	2.294	2.143	2.847	1.778	0.643	1.287	0.64702	-1.75051	-0.623971	GO:0008271	K18059
BraA02g029916E	15.287	12.521	3.676	24.328	40.979	38.436	8.29	43.437	37.002	6.797	2.255	3.495	9.488	8.896	19.759	5.855	5.935	9.277	1.36743	1.48909	2.16436	GO:0016491	/
BraA03g008002E	36.052	6.543	14.742	126.378	229.773	221.652	253.005	402.04	340.816	3.356	5.27	11.55	11.142	50.592	39.053	227.275	22.545	52.582	1.5422	2.56721	1.79072	/	/
BraA02g028739E	0.473	0.947	0.636	0.425	0.161	0.382	2.279	1.049	0.724	2.211	1.592	1.168	1.792	1.67	1.94	2.52	2.391	2.082	-1.24235	-2.4662	-0.711351	GO:0003677	/
BraA08g039107E	10.479	4.336	12.607	12.462	25.497	12.345	15.554	21.089	16.077	5.019	4.381	5.287	4.684	8.767	9.548	14.486	3.241	5.595	0.930906	1.17861	1.25187	GO:0003700	K09286
BraA02g031727E	14.803	15.629	12.983	18.07	63.167	30.872	32.077	101.078	53.401	18.624	18.464	18.404	18.733	25.163	18.612	31.039	15.413	20.482	-0.322527	0.90235	1.56882	GO:0006633	K15397
BraA07g035594E	3.407	3.238	10.941	9.344	5.25	12.404	40.993	3.398	9.015	10.405	14.475	14.312	2.689	4.189	2.336	10.756	17.092	8.892	-1.13226	1.5675	0.60194	/	/
BraA01g025613E	42.351	9.462	30.755	33.841	66.107	67.474	38.161	29.564	33.979	14.046	7.646	15.165	20.852	18.251	14.201	12.221	15.581	9.463	1.19835	1.69422	1.5246	/	/
BraA02g031160E	6.626	3.671	7.086	16.027	34.53	20.233	32.916	62.278	43.049	2.96	3.584	3.703	5.312	7.938	6.964	30.935	7.104	8.625	0.792107	1.85684	1.64464	/	/
BraA04g041477E	4.772	1.984	2.747	9.399	19.067	10.599	23.614	45.757	28.119	1.282	1.19	2.314	2.029	5.948	3.379	21.386	2.573	4.661	1.02399	1.83045	1.84504	/	/
BraA03g009840E	23.574	13.259	20.142	47.733	107.491	57.955	120.262	140.346	103.723	12.172	13.511	13.44	16.999	29.539	25.857	78.514	16.958	21.444	0.573296	1.60912	1.71273	/	/
BraA01g025240E	11.434	4.72	6.708	29.48	54.601	37.165	49.343	94.498	69.637	4.27	4.442	4.918	4.799	14.516	11.6	45.286	6.26	11.931	0.779394	2.01877	1.82514	GO:0007165	/
BraA01g028215E	10.189	8.849	9.469	8.145	4.345	6.549	3.341	2.404	2.842	7.196	6.865	6.536	8.153	6.393	7.877	4.731	7.729	8.675	0.500014	-0.224621	-1.22112	/	/
BraA05g017354E	21.929	3.572	6.826	71.883	161.506	114.967	205.204	290.354	224.29	3.071	4.605	4.666	5.276	29.457	17.258	153.369	11.132	19.57	1.42408	2.79664	2.0368	GO:0003676	/
BraA02g029110E	20.351	18.574	17.3	10.598	10.508	6.53	11.331	9.13	9.973	12.784	16.608	11.478	16.204	21.88	19.295	11.799	11.684	9.214	0.490098	-1.02967	-0.0272836	/	/
BraA10g046718E	65.824	31.61	7.88	2.251	9.512	5.383	0.096	0.097	0.229	1.548	0.181	8.611	24.136	24.614	23.403	0.247	0.214	0.153	3.39078	-2.0119	-0.470573	/	/
BraA05g017294E	0.288	0.371	0.664	0.167	1.469	0.342	0.127	7.697	5.537	0.165	0.08	0.042	0.289	0.042	0.041	0.288	0.204	0.204	2.23352	2.47492	4.3578	/	/
BraA07g037647E	104.448	109.587	86.717	33.521	48.323	25.714	19.297	43.032	42.025	37.344	90.904	53.916	72.456	117.46	100.869	45.954	41.463	43.724	0.751227	-1.39783	-0.246798	GO:0015267	K09874
BraA07g034364E	44.971	10.514	8.972	23.321	47.672	39.042	66.079	53.071	38.698	5.704	6.267	12.504	21.674	22.954	22.011	32.633	12.521	15.928	1.43545	0.76948	1.44346	/	/
BraA02g030347E	16.254	10.225	36.125	23.041	28.792	62.231	49.208	15.303	28.257	29.415	47.295	54.055	13.154	13.849	11.308	21.968	74.202	30.454	-1.03768	1.60996	-0.376523	GO:0008171	K00588
BraA06g022164E	23.95	10.846	10.27	50.923	98.992	77.233	88.225	148.206	125.967	7.25	7.665	10.41	12.69	21.098	21.625	86.422	11.157	21.097	0.866297	2.08292	1.68289	GO:0004842	/
BraA08g040488E	62.746	31.466	64.234	106.059	96.128	168.723	66.174	44.016	114.785	61.968	101.32	109.917	52.563	80.455	33.313	108.384	180.263	139.588	-0.757059	1.18249	-0.859237	GO:0003824	K16055
BraA02g029450E	0.441	0.126	0.444	0.892	2.632	1.241	2.015	13.956	7.469	0	0.062	0	0.126	0.323	0.189	1.761	0.062	0.062	3.93729	2.95761	3.71856	GO:0003677	/
BraA01g027123E	15.946	11.823	14.3	13.593	23.166	26.464	6.859	12.275	12.575	9.892	10.525	12.032	7.708	7.816	6.008	6.076	7.417	6.435	0.405901	1.59457	0.752545	GO:0005515	K15718
BraA02g029106E	23.468	29.683	18.216	49.349	13.472	34.589	15.627	11.105	32.93	27.974	36.164	51.732	74.89	57.747	49.829	65.19	114.034	87.795	-0.667255	-0.913328	-2.09334	GO:0003700	/
BraA05g017632E	11.368	4.966	8.065	22.872	23.931	25.319	24.776	32.99	34.546	4.283	5.004	5.632	5.524	8.789	9.923	24.934	6.625	9.642	0.741619	1.60412	1.23578	GO:0005634	K06627
BraA07g037090E	36.366	9.787	50.966	59.479	33.899	74.714	4.05	16.08	26.976	11.793	14.709	17.797	18.319	35.48	17.139	12.465	21.822	27.642	1.16024	1.26049	-0.314562	GO:0003700	/
BraA05g018080E	22.349	11.924	17.761	39.333	40.474	71.418	83.382	42.444	53.833	21.588	29.466	31.741	14.475	20.778	13.125	60.235	43.608	44.598	-0.639282	1.67479	0.34511	/	/
BraA02g030047E	23.506	14.258	10.101	54.121	112.299	59.659	145.291	233.835	144.326	8.96	11.06	9.366	9.743	25.414	15.15	133.588	14.416	15.798	0.737301	2.21651	1.7496	GO:0006950	/
BraA03g008845E	10.584	6.409	43.353	21.438	22.7	53.189	156.993	8.662	18.425	58.04	91.843	74.767	14.131	16.909	12.778	43.096	44.292	23.565	-1.87518	1.18435	0.789098	GO:0008483	K00827
BraA03g012304E	0.876	1.44	1.64	1.836	1.977	4.509	1.195	1.347	0.696	2.006	1.743	5.717	0.941	0.994	0.593	1	3.527	1.208	-1.22762	1.7501	-0.734479	GO:0004555	K01194
BraA07g037427E	25.331	17.549	25.976	57.643	51.378	72.373	42.941	53.417	70.264	27.519	39.25	33.727	24.286	27.038	19.87	49.326	44.807	30.602	-0.516393	1.37348	0.493078	GO:0005515	/
BraA02g028939E	33.553	37.726	16.024	11.341	13.594	9.22	11.521	13.297	11.513	16.749	18.273	18.735	30.573	38.143	40.598	12.548	15.579	18.467	0.733207	-1.64734	-0.276954	GO:0016491	K06892
BraA05g015388E	36.755	22.324	8.836	18.641	30.878	25.478	65.123	30.752	19.387	56.035	41.024	43.714	85.267	83.693	85.39	34.903	66.645	48.65	-1.01406	-1.72207	-0.303409	GO:0005515	K00799
BraA05g014718E	2.671	2.401	5.343	2.936	1.578	3.009	0.998	0.935	1.844	1.55	2.042	2.032	1.009	1.19	1.351	1.353	1.76	1.724	0.915671	1.09827	-0.284079	/	/
BraA09g001181E	17.623	16.974	16.673	27.254	29.891	37.087	24.548	36.466	34.053	21.138	19.629	22.689	15.689	15.429	14.304	25.599	32.039	24.461	-0.275954	1.08259	0.294229	GO:0004144	K11155
BraA10g046328E	22.272	9.851	11.167	50.508	129.093	68.928	109.506	207.377	86.321	8.878	7.452	9.261	8.473	44.635	19.538	60.882	7.491	9.234	0.793193	1.82914	2.45707	GO:0004553	K14504
BraA08g039868E	3.994	8.587	1.441	0.422	2.186	0.371	1.968	2.565	0.82	2.447	1.397	1.384	9.379	5.008	7.847	3.927	1.709	2.536	1.45982	-2.83647	-0.524996	GO:0016021	K15382
BraA02g029887E	13.248	14.753	17.921	9.098	6.111	6.304	6.404	9.883	9.436	10.177	12.247	12.444	16.658	16.306	18.946	10.48	7.824	11.666	0.426352	-1.25491	-0.140051	GO:0046854	K01082
BraA02g030521E	5.182	7.479	0.941	6.141	1.817	2.597	0.57	7.401	12.093	1.106	1.162	2.443	15.324	9.27	15.038	29.214	8.145	16.392	1.56675	-1.91825	-1.34973	GO:0016020	/
BraA10g046845E	29.792	25.905	29.014	46.703	21.291	54.888	13.156	16.696	27.294	21.138	15.119	25.524	15.123	15.607	17.099	19.449	28.397	19.56	0.48814	1.37338	-0.162405	GO:0008033	K10760
BraA08g041169E	1.793	1.325	2.195	2.817	8.009	5.661	3.955	13.262	6.394	2.817	3.071	2.533	2.267	2.515	2.256	4.791	3.79	2.702	-0.635474	1.28101	1.15828	GO:0003824	/
BraA10g044868E	14.322	15.755	15.626	35.694	83.612	68.102	118.243	162.071	107.816	16.721	22.677	23.047	15.02	23.985	13.903	83.451	21.916	18.786	-0.420628	1.87372	1.72002	GO:0016491	K04125
BraA03g009218E	8.331	8.913	7.169	6.376	14.087	10.494	23.158	10.142	5.94	12.338	14.183	9.459	16.409	22.052	28.1	15.883	9.894	12.595	-0.52911	-1.05472	0.104817	/	K01674
BraA05g017844E	62.115	53.381	72.067	77.553	40.429	68.784	20.212	37.546	60.887	92.575	79.148	76.145	139.535	108.235	150.75	75.654	103.593	102.715	-0.371535	-1.08288	-1.1715	/	/
BraA04g044386E	3.703	4.353	5.083	17.83	35.034	27.056	6.064	47.954	53.592	2.966	3.39	2.335	2.412	3.272	2.585	5.544	3.889	4.488	0.624312	3.31825	3.03356	GO:0003700	/
BraA10g047526E	41.527	34.809	40.569	67.001	89.119	74.668	113.95	160.953	119.567	49.815	48.855	45.862	44.974	59.132	46.666	90.493	45.661	42.335	-0.275125	0.648728	1.2234	GO:0003677	/
BraA07g037231E	14.657	11.518	10.979	25.357	36.299	28.109	35.867	54.762	46.618	9.895	10.137	9.537	10.002	14.542	15.393	36.669	10.078	14.418	0.361397	1.20706	1.24134	/	/
BraA09g001583E	67.105	65.762	108.91	53.241	220.416	65.031	179.965	161.043	121.123	43.894	69.15	48.231	31.592	31.314	27.75	77.206	60.068	60.133	0.610459	1.96605	1.30577	GO:0016491	K05933
BraA05g014647E	0.934	0.456	0.525	0.571	1.902	1.035	6.16	5.014	2.528	0.326	0.254	0.307	0.544	0.734	0.498	1.192	0.129	0.129	1.14406	1.03731	3.31058	GO:0005381	K14685
BraA07g035422E	5.98	4.653	6.337	8.958	5.912	12.993	3.016	6.324	8.861	6.742	10.816	8.494	2.93	4.221	4.815	3.626	2.715	3.857	-0.589941	1.24213	0.912537	GO:0006629	/
BraA03g011576E	54.437	17.548	53.492	156.205	175.259	251.428	132.327	208.208	266.858	12.847	14.178	33.223	38.621	74.324	75.316	169.493	73.24	101.535	1.0898	1.66572	0.892456	GO:0003700	K09286
BraA08g040884E	21.685	21.545	36.099	19.16	13.134	9.112	9.222	14.968	14.779	32.474	69.488	36.273	30.098	39.099	30.947	35.291	34.324	51.432	-0.776576	-1.26317	-1.55307	GO:0005506	/
BraA02g030238E	7.053	7.632	11.165	15.765	63.442	25.709	17.62	92.87	48.038	5.092	6.794	5.616	8.126	7.915	9.809	20.882	5.786	9.353	0.590023	2.08527	2.22759	GO:0008168	/
BraA04g043352E	10.289	5.268	10.202	20.518	14.195	46.559	27.078	6.676	15.691	12.086	13.53	15.861	6.739	13.904	5.575	13.586	31.912	32.187	-0.656791	1.6579	-0.582985	GO:0004672	K07198
BraA09g004176E	1.431	0.916	2.94	1.331	3.673	1.779	2.066	2.943	2.847	0.401	0.615	0.982	0.746	0.762	0.742	1.885	1.414	1.246	1.43138	1.64302	0.868386	/	/
BraA09g001273E	10.036	7.084	11.459	12.571	21.868	26.178	15.127	18.612	16.346	12.951	15.628	13.335	8.325	9.769	9.064	13.413	15.156	14.841	-0.523411	1.20066	0.287609	/	/
BraA01g027749E	19.863	12.712	40.168	28.204	17.259	88.401	15.82	9.045	29.988	45.77	45.36	43.774	11.124	17.658	5.972	17.058	100.768	46.247	-0.864191	1.97181	-1.50856	/	/
BraA02g032694E	6.478	5.107	8.209	10.044	10.773	22.562	6.541	3.7	6.081	8.709	8.45	13.098	4.473	5.254	5.616	4.456	9.48	6.274	-0.581857	1.53365	-0.233915	GO:0004553	/
BraA03g009643E	6.471	5.934	1.926	5.601	3.196	3.658	7.03	8.08	6.849	12.713	8.14	8.411	11.054	10.599	16.086	8.662	13.472	13.244	-0.992887	-1.58617	-0.605155	GO:0046983	/
BraA03g012053E	2.136	1.408	1.198	1.202	1.285	1.635	1.402	1.172	0.873	3.061	3.294	1.935	4.377	3.207	4.259	1.841	4.294	2.785	-0.774068	-1.4959	-1.28815	GO:0015079	K03549
BraA07g034496E	5.767	0.985	5.81	4.053	7.881	11.08	3.7	2.067	4.987	0.845	0.756	2.484	1.48	2.018	1.052	1.053	1.043	1.949	1.65338	2.38207	1.4798	/	/
BraA09g003796E	93.946	40.67	79.03	191.293	380.023	370.814	382.494	662.146	559.735	24.47	32.02	60.637	54.481	103.464	93.453	338.584	78.013	116.674	0.898796	1.95405	1.66434	/	/
BraA01g027554E	16.378	7.061	10.377	40.859	79.256	52.786	70.026	132.068	110.116	6.93	8.064	6.215	7.182	15.971	9.43	90.04	7.488	9.95	0.704883	2.45379	1.60885	GO:0010215	/
BraA03g010849E	5.64	1.638	0.55	0.092	0.371	0.471	0	0	0	0	0	0.918	4.376	3.076	1.996	0	0.09	0	3.13743	-3.30816	/	GO:0006662	K03671
BraA01g025353E	26.309	9.934	19.778	71.376	216.74	120.901	182.391	405.568	231.52	9.599	12.039	11.864	12.525	36.371	23.506	127.84	14.723	22.25	0.772835	2.55674	2.3918	GO:0004553	K08235
BraA07g035664E	28.183	22.688	25.077	38.225	61.365	62.117	40.087	75.367	67.531	29.962	32.657	32.683	25.084	27.176	22.783	52.871	37.699	30.843	-0.296444	1.14732	0.672922	GO:0004672	K13412
BraA05g014169E	43.58	45.427	30.299	33.454	14.908	21.19	8.381	6.495	10.25	28.442	30.476	31.491	35.639	45.368	41.905	18.959	28.292	34.552	0.432475	-0.818009	-1.62772	GO:0000160	K14492
BraA08g040757E	151.487	55.767	22.408	12.09	32.052	18.78	11.776	10.237	9.266	12.461	9.406	34.692	45.08	45.852	45.425	9.437	9.881	9.431	2.06187	-1.06274	0.20032	GO:0009058	K00814
BraA05g014145E	64.828	56.757	86.68	58.99	30.52	55.024	63.157	26.213	54.525	82.612	105.948	97.551	57.663	61.746	59.029	91.978	180.523	116.189	-0.429751	-0.29346	-1.36317	GO:0016020	/
BraA05g017810E	4.817	3.023	10.799	5.3	3.271	12.53	3.556	2.231	3.349	7.045	23.198	12.247	4.212	3.29	3.673	5.233	14.704	8.271	-1.16761	0.941254	-1.54923	GO:0016021	K15382
BraA02g030496E	6.188	1.676	2.109	20.462	70.146	37.997	36.477	143.924	90.85	1.118	1.908	1.315	4.942	9.439	5.336	50.623	5.013	5.663	1.23283	2.76466	2.22445	/	/
BraA03g010893E	17.991	7.151	7.201	30.385	43.606	29.001	52.286	64.883	51.321	6.628	6.187	5.656	7.244	13.232	14.743	42.446	5.58	14.668	0.843172	1.58742	1.49854	/	/
BraA06g022176E	1.716	0.595	3.033	1.062	2.96	4.064	2.6	1.25	1.742	0.526	0.479	1.06	0.947	0.861	0.803	0.979	0.796	0.624	1.40125	1.67968	1.29261	GO:0003700	/
BraA10g044971E	26.464	21.621	31.134	54.249	43.71	65.336	25.28	31.724	49.702	31.421	34.298	41.093	23.257	23.475	20.737	34.01	50.381	42.322	-0.401187	1.29717	-0.171261	GO:0004672	/
BraA06g023309E	8.38	2.249	1.802	29.859	35.551	8.42	39.321	68.544	58.836	1.381	2.046	1.65	1.895	5.13	6.42	45.037	2.626	7.988	1.32715	2.48917	1.65287	GO:0005515	/
BraA06g020122E	31.809	24.089	34.74	40.613	67.155	49.528	65.59	134.689	80.939	24.518	24.751	16.125	16.907	31.868	41.543	54.788	16.088	22.834	0.5007	0.845402	1.66749	/	/
BraA08g040898E	40.155	10.752	7.02	1.552	7.7	3.917	0	0	0	1.182	0.346	7.389	19.41	15.61	20.141	0	0	0	2.74158	-2.00543	/	/	/
BraA05g014063E	12.978	15.083	27.462	18.234	20.965	20.571	5.71	12.12	11.446	24.586	56.446	22.823	29.486	32.069	29.723	19.305	33.893	29.051	-0.880541	-0.580915	-1.40387	GO:0003885	/
BraA03g009108E	1.073	0.747	4.983	0	0.095	0.048	0.866	0.539	0.247	0.514	0.684	1.036	0.468	1.387	0.884	0.326	0.092	0.462	1.62987	-4.21517	0.987575	GO:0016491	/
BraA10g046859E	14.693	14.771	23.799	46.495	20.324	41.093	17.758	24.193	50.12	25.996	22.579	27.583	19.524	16.382	16.449	20.778	25.38	39.661	-0.486529	1.0489	0.174783	GO:0016020	K08145
BraA03g010228E	120.259	44.531	135.735	119.942	127.314	324.915	70.531	81.671	155.397	124.15	207.151	219.462	54.77	59.33	38.499	83.242	212.497	150.116	-0.845838	1.93919	-0.458902	/	/
BraA02g032983E	30.832	11.117	51.833	108.844	81.729	168.163	53.209	130.94	194.839	7.975	13.801	21.909	15.191	38.501	30.94	124.008	44.571	59.683	1.12874	2.11022	0.802932	GO:0003700	K09286
BraA07g034084E	11.638	8.24	8.374	17	41.725	24.045	38.277	59.89	43.869	8.323	6.015	5.719	10.489	12.93	13.905	31.041	8.403	9.16	0.527633	1.20139	1.62354	GO:0004672	K20714
BraA02g033161E	3.39	0.242	4.878	7.221	27.994	22.458	32.594	44.983	21.14	0.364	0.473	1.099	1.456	2.729	2.535	8.821	1.077	1.797	2.1655	3.16228	3.15499	GO:0045087	/
BraA04g042945E	27.567	10.035	18.238	53.762	75.948	61.286	86.965	124.683	97.137	8.52	12.92	12.049	14.446	39.581	31.479	83.74	17.512	27.559	0.768696	1.1988	1.33582	GO:0005515	/
BraA03g009870E	5.293	7.66	4.992	3.985	61.717	8.52	5.692	49.41	26.816	1.917	4.179	3.75	4.853	5.077	5.054	4.496	6.79	4.011	0.894753	2.39572	2.52025	/	/
BraA09g006310E	9.164	1.971	6.73	27.363	79.308	67.993	95.331	140.065	80.038	1.372	2.258	3.716	4.12	7.283	9.481	52.749	6.518	10	1.31364	3.12177	2.26212	/	/
BraA03g011244E	8.47	11.1	4.944	6.921	7.291	5.41	15.316	7.973	6.814	12.768	12.241	13.689	18.543	17.453	18.235	37.191	23.912	28.701	-0.625141	-1.44098	-1.5046	GO:0016020	/
BraA02g029855E	72.147	48.475	58.851	119.621	154.169	172.241	227.861	220.225	196.26	82.296	65.027	129.539	52.292	46.522	33.693	202.038	228.886	253.152	-0.592163	1.78342	-0.00602522	/	K03146
BraA07g035314E	16.834	14.562	18.071	18.548	11.237	16.95	14.027	8.634	13.883	19.4	20.235	22.409	17.711	17.887	16.98	21.065	33.303	25.58	-0.29629	-0.156345	-1.05593	/	/
BraA05g018337E	120.639	100.384	59.852	94.894	69.233	100.994	69.45	70.874	64.959	178.939	119.165	136.966	209.933	273.847	272.331	94.477	254.182	173.155	-0.595802	-1.49141	-1.26152	GO:0005515	/
BraA03g012907E	5.706	5.447	3.494	11.085	10.599	12.755	9.271	13.818	15.314	3.696	3.023	3.312	3.214	5.12	5.43	12.582	2.543	4.022	0.579866	1.35131	1.07459	/	/
BraA06g018998E	5.336	5.067	5.376	15.362	13.636	20.341	9.33	8.639	14.55	5.976	8.215	11.774	3.716	6.209	4.42	8.667	8.135	7.697	-0.687839	1.80875	0.481083	GO:0007017	K10418
BraA10g047245E	0.78	0.624	0.377	0.379	11.604	0.582	0.354	13.464	7.168	0.187	0.213	0.346	0.626	0.384	0.156	0.093	0.555	0.309	1.28874	3.51995	4.56144	/	K14487
BraA02g030744E	54.19	10.953	12.841	185.248	215.387	202.974	248.727	367.403	356.672	2.945	4.565	13.094	10.154	52.073	45.665	277.254	25.942	66.396	1.95817	2.52018	1.46533	GO:0016787	K07766
BraA07g035530E	2.473	1.477	1.206	7.542	18.124	11.08	17.737	50.374	32.636	3.035	2.493	3.462	1.599	2.044	2.029	22.34	4.337	4.026	-0.767527	2.74679	1.79386	/	/
BraA09g001020E	6.657	11.749	5.029	7.474	9.911	7.761	3.698	6.483	7.689	13.842	12.439	11.658	35.278	25.182	28.245	20.637	21.447	20.552	-0.662279	-1.7869	-1.73017	GO:0016491	K00366
BraA04g042499E	97.026	102.884	40.147	85.492	129.902	120.735	132.087	93.628	84.216	166.475	117.53	119.279	234.315	228.092	230.127	142.399	192.978	190.936	-0.712693	-1.00442	-0.685368	GO:0004356	K01915
BraA05g017353E	98.812	18.742	22.379	286.614	409.025	328.649	392.996	584.916	545.222	3.859	7.162	22.957	21.189	90.877	89.309	406.679	42.963	104.557	2.08012	2.38867	1.52869	/	K18999
BraA01g025101E	1.639	1.243	2.014	1.912	5.78	2.595	2.508	11.136	7.244	0.703	1.372	0.927	1.155	1.495	0.772	2.967	1.335	0.802	0.732102	1.64218	2.11934	GO:0004672	/
BraA02g030678E	1.83	0.382	2.998	3.374	75.289	16.857	41.854	202.663	82.22	0.403	0.962	0.649	0.685	5.212	0.722	39.557	0.894	0.736	1.39454	3.93802	3.07005	GO:0005515	K00454
BraA05g015081E	3.368	1.915	2.441	8.966	14.291	6.504	12.348	47.103	37.081	1.043	1.964	1.736	0.753	3.575	0.918	14.077	1.724	2.446	0.733238	2.54363	2.48007	GO:0005515	/
BraA03g008765E	5.079	3.233	7.094	5.485	11.994	9.73	7.224	12.965	9.733	2.388	3.194	3.883	4.164	4.061	2.801	7.759	2.929	3.731	0.731128	1.34841	1.13326	GO:0004672	/
BraA03g013027E	14.574	8.402	13.314	43.831	72.179	60.292	99.594	158.602	118.301	16.241	17.933	17.533	9.2	15.734	12.358	92.468	20.876	23.669	-0.480112	2.28301	1.53359	GO:0003824	/
BraA09g000712E	152.107	209.845	112.445	91.757	116.13	64.98	97.06	134.065	96.645	148.534	83.056	84.916	205.441	177.223	235.975	91.992	70.636	97.701	0.618578	-1.14864	0.415711	/	K03283
BraA02g028869E	109.35	75.892	115.117	108.409	84.914	161.655	127.05	37.381	73.309	106.123	163.578	160.165	54.511	74.693	43.32	110.161	151.797	115.395	-0.488237	1.06384	-0.599102	/	/
BraA03g009728E	37.287	14.617	29.809	128.876	148.046	149.317	160.238	236.767	237.67	12.846	17.799	20.135	18.369	44.965	40.268	162.373	39.186	59.076	0.71705	2.07479	1.35645	GO:0016021	/
BraA05g018527E	4.235	3.732	3.797	5.343	8.867	6.685	7.095	12.481	11.638	2.023	3.264	2.902	2.064	3.504	3.255	8.378	2.804	3.653	0.552203	1.28554	1.14965	/	K10664
BraA10g044805E	5.048	4.827	2.767	2.777	3.063	2.27	2.221	1.675	1.728	2.936	2.102	3.109	6.174	4.221	7.366	2.186	3.412	2.314	0.669025	-1.1034	-0.413709	GO:0008152	K08237
BraA08g040201E	12.639	13.661	12.979	11.35	21.126	10.561	3.925	12.476	12.758	8.581	12.38	10.302	7.456	6.002	5.278	6.694	7.745	6.057	0.358587	1.24135	0.593301	/	/
BraA03g011198E	9.919	3.203	3.934	15.635	57.046	30.354	54.947	87.556	50.67	2.502	2.975	3.231	5.87	13.684	13.319	44.049	5.172	10.433	1.00425	1.71176	1.77135	/	/
BraA09g006517E	5.504	1.709	4.079	13.624	23.395	16.851	68.136	40.045	47.071	7.411	9.824	4.916	8.622	6.741	9.085	25.261	10.756	7.825	-0.94234	1.18045	1.8911	GO:0016787	K07766
BraA02g028501E	1.271	1.837	2.419	16.042	38.994	21.715	5.926	74.578	72.354	2.828	3.771	2.661	3.114	2.026	2.442	11.28	5.259	6.429	-0.717587	3.38875	2.81827	GO:0003700	/
BraA01g027686E	0.583	0.848	1.548	1.179	0.378	0.439	0.437	0.445	0.393	1.273	4.916	1.497	0.797	1.14	1.691	1.269	2.514	1.73	-1.34769	-0.860978	-2.03115	GO:0003677	/
BraA02g032188E	4.837	2.861	1.067	1.749	30.139	3.513	2.258	6.893	3.326	0.707	0.896	2.138	3.75	5.064	3.239	1.374	1.117	1.223	1.26577	1.64243	1.84126	GO:0004351	K01580
BraA01g028223E	318.082	64.404	589.3	617.755	776.077	1137.83	139.408	1185.44	1593.4	109.756	74.228	132.643	89.965	145.301	180.367	120.498	178.416	119.682	1.64613	2.64552	2.88511	GO:0030145	/
BraA02g030796E	3.655	4.472	4.017	4.245	11.816	7.232	3.147	11.827	10.646	2.722	3.481	2.957	3.511	2.569	2.229	4.945	4.837	3.079	0.436313	1.53798	1.08014	/	K02552
BraA08g040607E	33.873	30.263	98.245	101.682	37.647	49.203	116.108	57.905	73.383	68.147	125.749	109.829	21.144	31.125	18.634	98.205	106.446	97.694	-0.880361	1.40422	-0.217404	GO:0004096	K03781
BraA05g015098E	11.55	12.25	11.879	12.472	18.141	9.745	22.925	29.198	18.56	9.293	10.955	9.672	8.454	13.011	10.433	16.419	11.476	9.334	0.283944	0.376136	1.00701	GO:0046872	/
BraA03g011182E	55.11	76.063	34.024	43.621	78.957	65.303	45.42	56.673	63.379	76.125	87.209	87.257	173.183	156.592	114.034	113.79	98.693	118.513	-0.568583	-1.19935	-0.922166	/	/
BraA03g012466E	11.403	16.698	17.695	79.497	29.276	48.609	4.079	40.399	121.956	19.474	18.457	28.537	12.58	10.082	11.189	15.652	34.179	51.278	-0.507284	2.21376	0.791682	GO:0005506	K00469
BraA05g014452E	15.327	12.778	25.236	21.626	40.9	30.032	12.036	20.892	26.028	13.208	9.421	13.698	15.666	14.923	13.879	9.096	10.892	13.884	0.5841	1.10092	0.879841	GO:0008152	K01714
BraA08g040709E	94.708	19.089	43.108	310.207	396.383	365.957	466.337	584.711	585.116	15.55	23.031	38.639	44.406	133.28	96.095	495.928	76.759	147.788	1.05708	2.00658	1.25282	GO:0016787	K07766
BraA09g000327E	3.06	3.139	3.743	8.776	4.628	4.417	3.044	5.588	7.948	2.126	1.891	3.167	1.283	1.6	1.635	3.553	2.145	3.105	0.500385	1.9853	0.988323	GO:0005524	K05658
BraA09g005375E	15.375	8.286	18.044	22.977	50.152	33.747	11.588	29.452	42.79	8.189	10.718	8.672	7.418	8.911	6.298	12.247	13.969	9.835	0.625	2.28687	1.2957	GO:0003700	/
BraA05g014255E	0.589	0.421	0.424	0.383	0.772	0.436	5.864	1.989	3.966	1.602	0.781	0.765	1.983	1.208	1.764	1.975	0.874	2.167	-1.09889	-1.60215	1.30157	/	/
BraA02g028562E	9.693	9.243	12.006	17.208	11.174	16.097	15.891	15.679	19.978	12.018	12.636	14.83	7.243	7.434	6.755	16.876	19.779	16.968	-0.32167	1.06845	0.0196149	GO:0000160	K12129
BraA08g040997E	35.861	20.443	9.317	17.962	36.532	19.247	79.796	34.19	38.999	42.675	39.914	35.746	74.55	55.882	37.368	97.394	41.264	74.986	-0.814378	-1.1438	-0.414647	GO:0004185	K16297
BraA09g000289E	7.35	5.084	4.99	15.301	29.524	20.269	26.446	66.685	49.261	3.848	4.398	4.869	5.254	9.063	9.078	25.19	4.976	6.095	0.442087	1.52364	2.0512	GO:0005524	K17260
BraA01g024233E	5.351	4.43	3.687	2.954	2.224	2.231	3.87	2.712	1.855	3.91	2.973	2.886	5.824	4.191	6.379	3.008	2.736	3.256	0.496457	-1.12726	-0.0142835	GO:0004650	/
BraA10g046930E	2.33	1.963	2.193	3.224	5.529	4.513	11.608	8.336	10.222	2.732	3.294	3.094	2.52	2.419	1.621	9.152	4.819	3.186	-0.461399	1.05451	0.883581	GO:0016021	K13754
BraA03g008373E	38.013	24.783	6.055	5.831	12.494	8.671	5.363	1.79	2.235	7.4	0.952	9.016	19.128	25.299	30.7	3.081	4.496	2.492	2.02992	-1.4289	-0.0286849	GO:0005215	K03098
BraA09g001941E	22.865	17.822	40.982	72.65	28.532	69.239	18.804	23.231	47.72	38.569	36.905	52.682	10.629	17.359	16.713	19.25	42.843	27.896	-0.621732	1.93845	0.0713984	GO:0008168	/
BraA03g012549E	37.794	10.485	10.435	103.351	102.062	99.556	150.356	191.241	194.127	2.963	2.047	11.759	15.508	45.672	37.507	159.032	18.344	41.546	1.84718	1.65706	1.35944	/	/
BraA09g001528E	2.407	2.459	2.914	2.739	2.092	2.144	1.093	1.36	1.971	2.167	1.883	2.325	1.276	1.086	0.976	1.69	1.528	1.078	0.318453	1.07992	0.116753	/	K13544
BraA07g037125E	0.776	0.437	0.733	1.912	2.47	2.513	1.251	3.309	2.618	0.291	0.332	0.147	0.34	0.745	1.016	1.452	0.863	1.344	1.36542	1.75029	1.05624	GO:0005515	/
BraA09g000838E	0.234	0.39	0.471	1.341	4.212	0.566	0.161	5.977	7.017	0	0.076	0.079	0	0.08	0.078	0.311	0.231	0.077	2.84674	5.34174	4.49046	GO:0003700	/
BraA02g031838E	17.658	6.492	6.744	52.904	223.799	106.234	106.938	393.522	233.344	6.121	6.805	5.274	9.276	23.377	15.124	130.653	6.212	5.61	0.797788	3.0683	2.44143	GO:0005506	K09843
BraA09g000773E	12.144	6.176	4.945	33.868	28.249	24.597	48.912	55.719	64.267	5.016	4.003	5.26	5.933	10.369	20.539	53.695	9.353	16.824	0.740182	1.26048	1.14827	GO:0005515	/
BraA06g019943E	22.114	17.815	33.685	44.248	182.941	86.876	48.015	219.456	124.349	34.091	32.496	36.96	27.527	25.687	24.255	51.453	58.128	42.092	-0.463291	2.08192	1.46451	GO:0005524	/
BraA01g027190E	14.618	13.99	14.527	11.295	10.089	11.661	18.881	16.259	15.891	21.616	14.122	23.387	28.108	31.66	26.352	16.965	23.847	21.168	-0.421904	-1.35884	-0.201056	GO:0016491	/
BraA06g021856E	21.833	9.72	11.187	51.393	114.304	71.19	117.453	256.984	188.673	8.939	10.955	7.723	9.399	28.751	13.693	121.78	11.384	15.479	0.662571	2.24187	1.99503	GO:0003677	/
BraA09g005325E	12.159	6.176	11.355	19.339	14.721	21.036	24.123	21.895	26.58	14.656	13.748	15.574	10.076	10.158	7.509	21.802	25.933	20.131	-0.535553	1.00907	0.173796	/	/
BraA10g046588E	25.179	16.003	28.159	64.578	54.949	72.005	82.572	48.618	84.043	13.472	14.834	20.573	23.844	33.905	25.514	66.181	44.64	45.374	0.534816	1.22533	0.530221	/	/
BraA03g009353E	8.456	2.217	5.011	3.063	6.496	5.859	2.519	9.256	6.318	1.992	3.003	3.286	2.039	1.344	1.218	3.295	2.995	2.327	0.953408	1.78757	1.15967	/	/
BraA10g047787E	0.672	1.419	0.827	1.283	0.837	0.929	2.234	4.468	3.319	0.374	0.219	0.527	0.823	1.301	0.968	0.522	0.59	0.813	1.41695	-0.00207828	2.46546	GO:0016872	/
BraA10g047863E	19.399	1.79	23.936	35.552	78.421	106.727	27.682	46.242	46.092	2.351	3.931	6.149	5.042	6.702	2.955	15.737	10.168	6.03	1.88789	3.95399	1.98792	GO:0003676	/
BraA03g011998E	4.912	3.012	5.131	11.649	21.56	16.445	15.014	39.561	31.359	5.666	6.765	6.122	7.236	8.767	6.953	20.923	9.912	9.855	-0.477457	1.15627	1.16083	GO:0003700	K09419
BraA04g041695E	5.451	5.149	6.941	5.539	8.851	6.137	8.906	12.17	7.614	4.848	4.783	4.077	4.686	5.557	4.995	5.718	4.868	4.463	0.385181	0.468542	1.0151	/	K00942
BraA08g039103E	8.307	3.111	5.83	20.22	30.399	27.623	17.991	37.233	33.166	3.193	3.653	3.854	4.379	7.825	7.106	20.671	5.526	8.999	0.720854	2.05879	1.4055	GO:0003700	/
BraA05g017874E	30.039	20.564	38.034	80.617	77.625	96.587	114.937	106.676	125.217	33.899	45.783	47.022	29.384	35.058	19.094	119.662	95.081	84.405	-0.487022	1.63363	0.287959	GO:0015969	/
BraA10g045212E	3.845	3.487	2.117	2.85	3.081	2.125	4.812	4.574	6.293	1.95	0.951	2.431	7.449	3.834	5.777	2.712	1.064	2.79	0.862345	-1.05781	1.32828	GO:0006629	/
BraA03g012635E	4.365	5.063	1.338	1.215	0.967	1.049	8.745	1.992	3.951	1.584	1.359	2.362	2.599	3.436	1.893	3.915	3.002	4.946	1.05766	-1.2746	0.37364	/	/
BraA02g030194E	37.755	46.318	53.026	19.514	29.981	11.453	15.199	69.325	43.896	31.42	42.412	35.126	43.963	43.212	45.182	36.107	32.695	38.853	0.35961	-1.08165	0.347484	/	/
BraA01g025010E	4.276	3.925	5.329	9.538	15.583	22.478	2.865	6.571	6.065	4.811	6.802	8.452	3.092	5.465	3.561	3.74	9.368	3.969	-0.539284	2.01557	-0.0516721	GO:0055114	K00121
BraA05g015127E	12.982	5.894	7.144	41.584	72.573	59.475	76.53	125.397	90.062	5.68	5.114	5.395	9.73	16.543	20.237	71.55	10.999	20.295	0.718404	1.94574	1.58063	/	/
BraA09g006704E	57.474	40.412	43.154	68.462	61.526	99.347	16.973	68.519	126.101	79.47	70.482	47.464	217.536	149.572	120.293	88.465	118.022	120.592	-0.452938	-1.06439	-0.551239	GO:0016020	/
BraA06g023726E	4.351	5.418	0.699	2.106	1.179	4.509	1.91	3.887	3.086	7.368	4.656	13.172	16.281	6.782	1.292	21.208	8.739	9.16	-1.22876	-1.63107	-2.0593	GO:0003824	K01087
BraA04g044284E	10.981	4.568	8.434	28.249	29.018	20.001	80.303	98.374	52.873	5.225	4.406	5.815	6.428	13.256	9.27	53.83	5.857	10.382	0.667565	1.44282	1.79802	/	K01054
BraA02g031915E	2.235	1.545	2.006	3.04	1.49	3.201	1.048	1.322	0.86	1.994	3.096	5.003	0.855	1.416	0.567	1.582	3.173	2.011	-0.771669	1.45771	-0.980841	/	K15283
BraA01g024948E	17.329	11.889	14.667	21.59	41.722	31.652	12.675	36.48	34.878	11.164	12.069	12.16	12.977	10.745	12.348	18.835	17.574	13.493	0.341532	1.44098	0.835887	GO:0048544	/
BraA05g017791E	44.613	45.916	17.062	22.145	39.468	34.648	21.29	24.965	19.873	26.827	20.156	22.665	88.263	86.448	80.031	42.428	26.106	40.9	0.663203	-1.36183	-0.646808	GO:0006099	K01595
BraA10g046763E	1.781	0.86	14.354	5.34	45.921	29.088	26.355	96.762	44.589	0.984	2.099	2.293	1.6	3.209	2.634	14.1	1.882	1.337	1.67874	3.50545	3.3589	GO:0009055	/
BraA08g038766E	0.205	0.322	0.118	0.119	0.299	0.091	0.302	2	0.837	0.029	0.057	0.089	0.176	0.06	0	0.176	0.145	0.029	1.91475	1.1447	3.26548	GO:0004672	/
BraA06g020767E	31.575	14.239	27.82	36.838	21.648	53.918	29.522	19.044	33.259	34.272	34.508	41.574	17.579	20.232	16.644	32.82	50.828	39.179	-0.552328	1.06394	-0.513144	/	/
BraA09g002273E	1.318	1.074	1.524	3.75	8.848	4.602	4.531	9.118	7.127	0.733	0.715	0.837	1.027	1.45	0.73	4.481	1.013	1.497	0.807849	2.47201	1.64901	GO:0003700	K14517
BraA06g023430E	7.343	3.099	13.947	14.616	5.259	28.261	14.084	7.507	22.464	11.027	14.044	21.689	6.055	5.211	4.653	13.781	13.533	14.948	-0.912415	1.61142	0.125197	GO:0016787	/
BraA08g039219E	68.449	63.299	93.297	179.027	157.017	235.334	61.365	151.1	208.062	85.257	94.863	120.47	77.251	89.043	51.116	124.211	252.069	232.385	-0.388259	1.41721	-0.450756	GO:0005975	K01183
BraA03g011299E	23.687	20.291	34.299	24.974	11.733	21.097	15.095	9.429	21.313	37.061	39.335	31.433	27.367	28.797	23.189	25.887	43.319	37.13	-0.433629	-0.450008	-1.14297	/	K16285
BraA09g001471E	2.13	2.331	2.604	12.11	22.773	21.47	15.681	54.631	50.247	2.734	3.538	3.105	2.226	2.966	2.197	27.603	6.784	5.8	-0.379362	2.97544	1.66141	GO:0005515	/
BraA04g042934E	92.322	38.187	59.844	166.235	288.792	207.747	407.917	368.294	317.502	39.314	48.866	42.938	45.974	89.255	71.596	285.783	81.39	100.364	0.569592	1.72406	1.29713	/	/
BraA08g039426E	1.401	1.401	2.687	3.123	9.069	3.878	6.749	25.436	12.265	2.44	3.073	2.904	1.788	2.202	2.334	5.956	3.414	2.943	-0.589946	1.40204	1.94422	GO:0003924	/
BraA07g033702E	1.615	0.998	5.887	1.873	25.989	5.416	3.627	13.465	8.498	0.856	1.253	1.534	2.047	1.655	0.853	2.229	1.738	1.269	1.2454	2.94887	2.37911	GO:0008168	/
BraA09g005439E	24.857	26.345	20.642	21.803	16.562	13.09	16.564	25.74	32.494	30.739	36.414	26.644	58.438	52.038	68.071	40.774	54.519	31.178	-0.354004	-1.77795	-0.678626	/	/
BraA09g000613E	0.158	0.58	0.85	0.746	0.161	0.437	0.109	0.055	0.502	1.372	1.802	0.745	1.162	1.783	2.944	0.947	1.042	1.461	-1.27971	-2.12679	-2.31009	GO:0005509	K06268
BraA01g024841E	1.339	0.849	0.045	0.09	0.045	0.046	0	0.187	0.142	0.358	0.044	0.09	0.716	0.183	1.38	0	0.353	0.486	2.22996	-3.62672	-1.25244	GO:0016020	K14709
BraA07g036440E	9.98	2.88	30.419	12.354	27.892	48.799	26.134	27.263	30.468	3.715	5.685	8.844	3.27	4.916	2.871	11.175	7.651	4.811	1.26959	3.05691	1.90155	/	/
BraA02g030236E	2.13	2.335	2.26	9.279	4.709	10.756	5.774	5.732	8.802	2.949	2.412	4.756	1.521	1.764	0.994	7.578	8.377	7.893	-0.556807	2.54312	-0.157361	GO:0005634	K04506
BraA01g028154E	8.592	7.419	2.825	1.189	2.119	1.594	0.187	0	0.096	3.169	0	2.373	4.713	3.336	5.502	0.09	0.089	0.089	1.80817	-1.4316	/	/	/
BraA05g014592E	3.923	3.193	0.619	2.043	1.969	1.426	3.353	3.319	1.797	6.097	7.778	3.132	14.142	14.639	16.994	7.161	9.406	9.532	-1.102	-3.04915	-1.53873	GO:0000145	K07195
BraA06g019001E	10.04	7.07	16.037	16.295	27.521	41.692	2.453	13.035	13.562	11.97	24.514	17.797	15.82	11.979	10.21	5.539	13.189	11.046	-0.686301	1.20923	0.0541228	/	/
BraA09g001479E	73.663	29.759	27.27	164.562	247.027	240.948	229.064	356.875	355.199	22.09	19.139	37.062	31.93	56.191	75.151	234.391	47.868	81.332	0.775766	2.04157	1.44431	/	K16281
BraA09g000541E	22.003	8.958	2.674	1.183	3.071	1.446	0	0	0.048	1.622	0.044	3.95	8.116	7.192	11.532	0	0	0	2.62622	-2.18518	/	/	K15121
BraA05g015344E	9.824	4.309	4.758	59.365	183.719	124.139	192.28	320.707	232.661	3.178	4.65	4.156	5.68	15.176	13.678	161.77	6.05	15.068	0.689146	3.47038	2.09737	GO:0003824	/
BraA07g035443E	10.569	7.308	12.318	24.829	33.779	24.217	67.878	69.449	64.759	13.798	15.382	12.496	15.213	13.006	15.966	42.15	18.795	24.916	-0.435719	0.940791	1.30963	/	/
BraA09g000928E	11.676	9.92	13.195	23.678	46.647	36.269	34.424	73.715	61.071	12.673	15.865	16.359	13.295	13.697	11.239	38.547	18.466	17.146	-0.338382	1.52361	1.27055	/	/
BraA03g010099E	0.952	2.142	6.519	4.57	78.959	37.626	2.7	24.723	26.186	4.621	6.691	10.083	5.96	3.51	3.037	1.567	7.901	1.46	-1.13158	3.3512	2.38816	GO:0005975	K01183
BraA03g013349E	10.654	11.637	8.763	5.412	2.097	3.894	1.274	1.837	2.887	6.287	7.792	9.505	6.241	7.647	5.184	3.391	8.038	6.927	0.428607	-0.738856	-1.53473	GO:0003700	/
BraA02g031417E	871.054	1331.32	881.377	685.503	543.125	544.115	657.421	533.062	639.715	903.866	1728.38	2038.19	1283.65	1583.75	982.47	1833.35	1296.41	1419.09	-0.56932	-1.10176	-1.24034	GO:0006508	/
BraA08g039883E	2.784	8.552	2.706	1.258	0.5	0.611	12.332	0.619	0.797	3.246	2.367	2.181	1.182	3.523	2.548	1.602	1.068	0.616	0.88215	-1.60942	2.12135	/	/
BraA08g040754E	9.927	6.771	18.241	22.127	34.936	22.332	25.894	81.294	49.49	6.212	7.933	8.197	6.501	11.327	9.113	28.885	11.876	10.661	0.671804	1.59945	1.69309	/	K13464
BraA01g028192E	2.316	0.409	5.17	1.653	2.961	3.013	12.931	0.81	2.5	1.228	0.798	1.1	0.364	0.745	0.226	4.896	2.469	2.112	1.36396	2.55706	0.832018	/	K09422
BraA09g004839E	4.803	1.939	2.547	6.603	8.198	7.424	18.43	9.376	8.428	1.308	1.811	2.339	2.027	3.497	3.824	10.725	4.165	4.836	0.800581	1.28401	0.945603	/	/
BraA06g019695E	0.767	0.329	5.042	1.478	3.871	3.597	0.754	5.101	3.789	0.329	0.571	1.069	0.622	0.449	0.765	3.209	0.542	1.301	1.66113	2.33368	1.01563	GO:0005506	/
BraA05g017641E	6.546	7.057	4.13	9.349	7.154	4.512	5.868	9.306	12.208	7.063	10.334	8.145	27.736	17.939	26.62	34.194	18.374	16.885	-0.495371	-1.7683	-1.26946	GO:0003824	/
BraA09g004488E	73.588	99.352	52.698	45.87	50.368	30.107	40.721	66.64	50.116	73.462	44.231	41.7	92.597	82.316	118.153	42.962	35.495	45.795	0.535906	-1.1857	0.426287	/	K03283
BraA03g011379E	0.174	0.19	0.223	0.272	1.207	0.36	1.842	4.561	1.722	0.316	0.355	0.399	0.507	0.502	0.252	0.52	0.828	0.469	-0.83766	0.605708	2.25777	GO:0043531	/
BraA01g026555E	3.647	4.932	6.736	16.184	12.523	16.31	41.178	29.281	25.949	6.086	7.652	9.406	3.858	4.429	3.368	17.934	13.553	11.429	-0.567362	1.97011	1.24274	/	/
BraA06g020523E	8.083	8.448	13.056	9.907	3.496	1.638	3.028	2.038	3.489	5.335	8.688	7.063	6.381	7.773	6.35	6.716	6.918	5.496	0.515249	-0.463581	-1.08871	/	K09422
BraA01g026897E	8.22	6.764	10.432	22.522	15.261	44.404	9.141	5.267	9.039	8.907	12.581	14.005	1.961	4.74	2.945	4.866	9.286	4.014	-0.45308	3.11715	0.441196	GO:0016021	/
BraA09g000177E	1.231	1.642	2.48	4.979	4.18	5.784	6.265	9.735	8.426	0.904	1.042	0.911	0.658	0.673	1.391	2.294	1.704	0.325	0.93335	2.47985	2.57821	GO:0006950	/
BraA06g020491E	1.551	1.896	2.582	2.504	3.049	2.366	1.511	1.967	2.644	2.005	3.744	3.542	1.554	1.28	0.752	2.322	3.385	2.344	-0.597464	1.17115	-0.317388	GO:0004672	/
BraA08g040310E	48.285	11.41	26.423	165.98	266.789	273.487	251.881	417.737	412.988	5.531	6.986	20.854	18.12	49.961	45.498	235.521	44.27	72.002	1.40237	2.68084	1.6937	GO:0003676	/
BraA10g045732E	0.589	0.471	0.089	0.506	0.21	0.092	0	0.587	0.28	1.415	0.748	0.624	2.567	1.659	4.904	0.294	1.979	2.535	-1.23936	-3.49417	-2.36324	GO:0004672	/
BraA03g012528E	9.457	3.875	6.083	8.236	10.098	9.86	6.993	5.92	7.537	3.137	3.505	5.461	3.939	5.136	3.466	6.596	11.149	3.382	0.714981	1.20016	0.029836	GO:0005622	/
BraA02g031117E	18.261	3.713	6.381	92.314	276.722	182.594	186.85	488.357	342.7	2.329	5.751	5.993	5.802	22.868	9.278	189.895	7.337	8.374	1.04385	3.91848	2.37992	GO:0003700	/
BraA09g006516E	6.686	2.693	6.648	6.496	20.786	14.308	17.108	13.853	10.476	11.649	8.904	6.571	15.662	12.544	10.304	6.067	5.149	5.842	-0.728065	0.164125	1.35935	/	/
BraA09g001857E	5.226	3.665	8.714	12.328	3.855	10.459	11.773	3.089	7.311	8.6	9.151	9.092	3.01	4.677	2.815	9.414	16.446	7.905	-0.58072	1.34381	-0.539171	/	/
BraA03g009536E	3.101	2.298	12.151	4.413	5.851	3.214	6.754	7.355	6.93	1.84	3.141	2.898	1.842	1.53	1.833	4.587	3.747	2.16	1.17718	1.40349	1.0816	/	/
BraA09g002898E	1.283	2.061	2.643	1.631	3.564	2.498	1.203	2.101	1.214	2.004	3.663	3.805	1.597	3.624	0.795	3.841	6.724	2.75	-0.635574	0.399988	-1.46962	/	/
BraA09g004167E	23.079	12.125	13.253	51.084	114.414	76.573	111.851	205.52	165.903	10.82	13.045	11.721	11.691	22.611	17.023	114.055	14.326	15.966	0.477823	2.28809	1.81532	GO:0004842	/
BraA07g035051E	0.28	0.14	0.893	1.274	8.652	2.757	1.059	6.711	5.235	0.234	0.046	0	0.468	0.335	0.419	0.279	0.323	0	2.26352	3.44779	4.5222	GO:0004672	/
BraA09g005149E	15.09	12.365	12.982	21.699	49.705	32	41.117	109.977	67.333	10.96	12.048	11.748	10.37	15.388	11.825	43.374	11.791	12.918	0.249586	1.51	1.76417	/	/
BraA09g000951E	23.959	18.494	22.976	39.479	82.754	56.676	76.226	207.481	127.852	25.717	27.195	26.648	20.085	26.554	17.547	77.095	31.766	25.104	-0.251382	1.52519	1.70362	GO:0004672	K13412
BraA01g024478E	2.04	1.7	2.055	10.598	23.203	27.482	8.767	31.522	33.461	1.985	3.818	3.488	2.953	3.425	4.351	12.556	6.497	8.466	-0.652598	2.56293	1.5027	GO:0005515	/
BraA08g041191E	7.659	2.254	3.307	14.512	24.916	23.482	42.296	52.159	34.265	1.547	1.446	3.702	2.516	8.375	7.703	29.234	4.962	8.407	1.01812	1.80455	1.66938	/	/
BraA01g023975E	1.007	1.314	3.396	9.958	6.243	22.912	19.96	8.96	12.926	0.438	0.855	1.414	0.921	1.749	0.742	4.894	14.539	4.938	1.10339	3.54407	0.855157	/	/
BraA06g020774E	4.47	4.358	7.859	16.264	21.666	19.593	23.996	56.394	49.327	7.212	9.649	7.154	6.905	9.772	5.934	14.722	8.64	8.057	-0.498593	1.38105	2.12736	GO:0004553	K05349
BraA01g025923E	1.814	0.353	0.965	4.026	7.085	4.44	6.603	9.84	5.761	0.353	0.64	0.305	0.606	2.685	1.91	6.138	0.847	0.948	1.29976	1.62563	1.56024	/	/
BraA09g006225E	2.685	1.714	3.079	4.331	15.595	10.716	4.537	12.622	10.278	3.489	4.296	3.084	5.152	3.863	2.991	5.246	6.211	3.476	-0.510877	1.40735	0.96472	GO:0003682	/
BraA04g043765E	2.677	3.521	3.645	5.011	7.221	3.699	1.687	3.434	4.511	2.531	1.597	2.701	1.391	2.184	1.829	2.573	3.919	5.297	0.559783	1.59592	-0.210702	GO:0003700	K14516
BraA03g013298E	48.142	24.444	53.156	197.638	173.591	284.739	95.487	234.796	338.098	22.151	31.679	34.461	76.806	148.329	55.949	209.059	49.363	107.894	0.539052	1.24725	0.938416	GO:0003712	/
BraA02g032439E	0.128	0.085	0.258	0.345	0.131	0.133	8.106	0.359	0.723	0.599	0.626	0.172	0.813	1.313	0.98	1.108	1.9	1.775	-1.54068	-2.33856	1.00471	/	/
BraA10g046341E	7.575	4.077	8.066	16.577	6.593	9.987	25.767	17.312	22.072	8.352	8.194	13.643	4.084	3.144	4.351	23.259	22.462	22.629	-0.58351	1.51787	0.00466207	/	/
BraA07g034996E	7.439	6.637	2.565	5.804	3.573	2.917	1.659	7.879	4.161	10.914	7.57	8.386	13.073	17.944	21.074	6.801	18.724	16.578	-0.654845	-2.07164	-1.519	GO:0004672	/
BraA09g001694E	0.272	0.142	0.248	0.258	0.286	0.197	0.321	0.265	0.258	0.272	0.324	0.397	0.579	0.487	0.486	0.37	0.313	0.235	-0.554807	-1.04299	-0.0473502	GO:0005506	/
BraA06g021938E	1.48	1.745	0.586	0.855	0.646	0.986	0.763	0.499	0.615	2.646	1.807	2.453	2.278	2.166	1.898	0.95	1.985	2.144	-0.822009	-1.33008	-1.35658	/	/
BraA05g014358E	0.093	0.602	0.373	0.047	0.754	0.096	0.239	2.478	0.637	0.046	0.181	0	0.186	0	0	0.046	0.092	0.092	2.24743	2.34353	3.97821	/	/
BraA01g024999E	0.304	0.101	0.561	1.688	0.361	0.577	1.723	0.637	0.803	0.659	0.741	0.919	0.152	0.104	0.101	0.859	0.95	0.25	-1.23659	2.86247	0.690092	/	/
BraA07g037240E	60.029	46.545	16.359	19.923	21.376	18.816	26.069	21.355	21.435	30.234	22.453	23.845	48.455	39.539	47.857	19.671	16.142	27.263	0.720675	-1.14957	0.20372	GO:0046983	/
BraA07g034355E	16.907	4.983	14.397	46.804	67.766	53.455	52.428	117.946	91.92	5.139	7.126	9.546	5.648	14.951	9.484	53.043	9.848	16.979	0.76509	2.52053	1.79256	/	K09422
BraA02g030021E	2.9	1.123	1.979	7.565	18.39	11.924	13.026	50.662	32.668	1.03	1.37	0.472	0.562	1.342	2.145	13.165	1.479	2.314	1.09152	3.27978	2.58653	GO:0030001	/
BraA08g040044E	1.374	0.639	6.76	0.905	4.036	1.126	1.45	3.857	3.822	0.736	1.248	1.612	0.384	0.622	0.542	0.989	0.505	0.253	1.30762	2.03732	2.46479	GO:0005506	/
BraA03g011494E	12.529	3.889	5.513	27.816	47.557	31.799	40.684	75.941	56.238	3.514	5.418	4.418	3.366	16.627	6.172	36.994	4.551	6.834	0.748821	2.07725	1.91106	/	/
BraA04g044142E	145.694	122.637	197.594	134.382	261.025	192.218	216.477	301.871	258.775	101.738	153.01	102.291	118.557	122.729	111.061	152.391	119.688	109.105	0.411221	0.782594	1.10835	/	K10775
BraA09g005946E	0.788	0.839	0.896	0.668	0.828	1.264	0.708	0.934	0.753	1.349	1.713	0.898	1.834	2.005	1.901	1.04	1.482	1.308	-0.621831	-1.02532	-0.595438	GO:0005515	/
BraA03g011824E	6.745	5.475	13.053	11.126	4.701	5.948	3.998	4.006	7.044	6.99	20.772	15.254	2.609	5.486	2.95	8.504	13.947	10.918	-0.743955	0.979145	-1.07409	GO:0016020	K08150
BraA07g036147E	2.126	2.177	1.544	2	3.224	2.819	7.142	3.582	6.908	2.673	2.077	5.14	2.973	1.419	1.479	2.567	1.808	3.229	-0.723666	0.487959	1.28188	GO:0016788	/
BraA08g040133E	105.85	47.607	96.871	165.71	139.773	279.465	81.357	40.892	140.926	88.24	147.708	136.215	58.041	93.638	36.182	72.196	223.601	140.301	-0.543002	1.6632	-0.659575	GO:0004672	/
BraA03g009701E	19.532	4.91	15.599	79.401	199.081	145.22	111.084	269.938	204.207	5.776	7.759	10.162	11.562	19.598	23.567	113.148	15.806	28.541	0.787877	3.00759	1.97008	/	/
BraA06g018930E	10.615	9.693	9.326	31.822	66.767	54.432	89.672	130.178	90.562	10.566	14.254	12.331	8.628	29.656	8.524	71.277	14.915	12.977	-0.296051	1.75565	1.72045	GO:0005509	/
BraA03g011593E	3.745	1.828	6.459	11.238	4.914	17.762	7.758	1.95	7.262	4.65	7.93	7.891	1.862	4.758	1.554	6.67	15.43	9.042	-0.74087	2.06787	-0.809752	/	/
BraA05g014570E	110.896	138.389	210.765	89.514	23.31	22.534	18.414	30.597	59.79	100.621	141.455	103.622	85.348	83.272	85.597	75.158	119.845	119.599	0.438611	-0.931565	-1.4565	GO:0005576	/
BraA06g020260E	0.805	0.186	0.873	7.072	26.798	13.472	22.604	56.071	42.778	0.248	0.302	0.062	0.62	0.634	1.543	18.969	0.367	1.102	1.63002	4.14479	2.64175	GO:0003700	/
BraA02g030120E	16.959	10.427	11.034	51.171	58.728	56.362	43.403	99.486	95.572	10.141	9.403	10.577	9.648	14.42	14.006	59.781	12.572	19.724	0.384236	2.15875	1.44754	GO:0005515	/
BraA06g019929E	2.61	0.803	1.416	9.643	28.126	20.915	25.271	46.159	29.964	0.804	0.49	0.912	3.22	6.378	8.41	25.957	1.985	5.663	1.16673	1.76239	1.66835	/	/
BraA10g047775E	14.778	4.403	5.695	19.514	20.896	28.164	46.485	28.101	35.812	4.043	4.417	6.438	3.804	8.605	4.349	29.504	6.067	9.349	0.775147	2.06383	1.36077	GO:0003700	K09286
BraA07g035229E	18.489	13.696	7.394	9.466	22.813	19.212	11.454	10.568	7.32	24.729	19.803	15.762	36.728	34.61	36.597	12.492	28.414	19.227	-0.572078	-1.01845	-0.950049	GO:0046983	/
BraA03g012263E	5.377	11.974	10.24	9.801	104.985	31.889	1.498	68.302	62.303	5.187	8.509	4.792	11.445	9.369	5.792	1.802	1.94	4.582	0.603854	2.53861	4.08095	GO:0009058	K00815
BraA07g035509E	34.135	21.066	11.458	16.577	21.008	13.927	20.954	24.244	21.168	34.051	30.521	37.445	50.452	64.204	51.856	28.341	53.056	41.083	-0.577965	-1.66062	-0.799889	GO:0005524	/
BraA04g041607E	2.209	2.14	3.639	2.854	3.394	2.853	7.579	4.841	4.472	1.738	2.243	1.893	0.984	1.743	1.399	3.186	2.478	1.579	0.47065	1.17342	1.29533	GO:0000139	/
BraA10g044792E	9.89	2.415	2.04	3.464	2.089	2.879	0.027	3.433	2.445	10.994	6.338	10.714	19.926	25.48	17.914	3.99	17.73	13.383	-0.927362	-2.89482	-2.46928	GO:0016491	/
BraA03g008680E	3.258	3.095	2.164	2.766	2.539	2.776	2.393	2.33	2.759	4.495	3.371	3.382	8.676	5.172	6.963	2.945	5.308	3.599	-0.367482	-1.34227	-0.584358	GO:0003676	/
BraA06g023432E	13.342	7.577	18.949	41.33	54.06	75.275	26.493	58.653	68.481	5.725	9.258	11.288	9.902	26.107	18.058	49.168	16.262	23.03	0.629309	1.69669	0.870712	GO:0003700	K09286
BraA02g033226E	47.762	44.997	21.431	36.276	30.587	26.613	19.075	31.396	33.496	63.373	49.533	52.527	95.031	103.04	126.018	44.785	80.384	75.08	-0.499679	-1.7723	-1.17008	/	/
BraA05g018111E	48.046	48.932	38.606	55.937	68.893	54.372	84.27	104.371	82.312	43.657	35.655	36.841	47.885	50.035	48.151	64.307	34.241	42.809	0.255905	0.326593	1.01756	GO:0003676	K03248
BraA09g000274E	1.389	0.876	0.973	0.397	0.154	0.125	0.343	0.19	0.192	0.423	0.944	0.579	0.514	1.516	0.693	0.542	0.388	0.179	0.762891	-2.00636	-0.541157	GO:0005315	K14640
BraA06g021821E	0.378	0.189	3.333	0.319	2.824	0.392	6.045	2.414	1.034	0.505	0.554	0.254	0.253	0.452	0.314	0.786	0.747	0.873	1.58932	1.87525	2.0552	/	K15102
BraA02g029544E	4.897	1.264	1.751	17.648	79.414	35.117	44.487	131.159	70.552	1.265	0.926	1.753	1.9	4.855	2.284	58.028	3.279	3.204	1.04168	3.93617	2.00951	GO:0003676	/
BraA02g033179E	4.153	3.914	4.011	2.984	1.573	1.708	2.16	2.342	2.434	2.887	3.721	3.048	5.675	2.989	4.621	3.392	5.123	4.619	0.352603	-1.07795	-0.841297	/	/
BraA08g039440E	6.374	2.25	11.293	10.424	58.283	29.415	16.863	61.787	41.942	2.778	4.064	4.502	7.064	7.491	4.487	20.547	8.709	4.155	0.838002	2.43098	1.93563	/	/
BraA08g041132E	0.774	0.915	0.496	0.498	0.358	0.292	0.472	1.219	0.559	0.317	0.241	0.604	1.657	1.839	2.211	1.019	0.73	0.627	0.948455	-2.29207	0.00987591	GO:0015743	/
BraA07g034420E	8.411	2.087	6.717	53.653	114.773	101.317	60.07	130.323	137.625	2.431	4.308	3.416	4.283	9.284	14.288	64.954	8.686	12.011	0.790694	3.32881	2.00734	GO:0006629	/
BraA08g039647E	47.92	48.185	76.074	54.054	174.999	92.436	96.517	188.727	110.3	69.5	78.081	74.775	80.613	59.764	64.006	71.138	66.179	62.594	-0.340756	0.709982	1.07326	/	/
BraA03g008121E	3.832	8.693	1.723	3.666	1.464	1.489	5.576	3.017	2.897	2.809	2.406	2.555	16.525	12.619	14.33	14.275	5.072	9.005	0.909355	-2.71332	-1.23322	/	/
BraA08g040440E	8.408	8.519	9.393	2.615	1.043	2.067	1.279	0.566	2.282	11.116	13.422	9.3	12.908	16.124	11.986	3.443	9.855	6.24	-0.333486	-2.83186	-2.17445	GO:0003677	/
BraA04g043095E	17.34	16.098	19.029	32.366	28.359	32.375	54.152	43.991	44.491	14.173	11.892	17.455	12.116	10.051	12.701	52.014	36.236	32.613	0.301434	1.43963	0.313284	GO:0003824	K01087
BraA08g040903E	5.835	7.37	8.016	12.812	8.706	6.475	3.223	6.311	6.238	3.836	5.814	6.245	1.713	4.408	3.35	6.178	8.622	4.841	0.445609	1.57747	-0.233658	GO:0003700	/
BraA03g010978E	2.835	3.066	3.404	5.154	8.84	8.192	7.504	14.46	10.548	3.957	3.944	3.844	3.903	4.196	3.17	6.833	4.303	3.797	-0.30564	1.01719	1.2057	/	K09903
BraA07g036404E	16.211	3.543	9.447	50.733	75.864	58.159	57.322	142.05	112.024	2.946	6.674	6.795	4.099	19.267	10.695	77.974	7.05	16.782	0.861754	2.48024	1.68744	/	/
BraA04g043652E	9.86	1.182	2.627	53.757	142.739	103.542	216.712	285.051	210.52	1.509	3.263	1.604	2.654	10.812	11.621	153.169	3.463	11.047	1.13312	3.63854	2.15376	GO:0003824	/
BraA01g027584E	35.835	33.345	44.2	42.059	27.621	39.97	11.97	16.002	22.796	39.979	55.293	46.648	31.124	37.222	31.351	26.271	52.251	37.186	-0.295432	0.153187	-1.109	GO:0005515	K14484
BraA06g019594E	3.166	3.795	0.695	2.092	2.172	1.202	3.428	2.007	1.891	5.901	4.286	3.986	6.88	7.131	8.816	2.848	2.727	4.219	-0.851782	-2.03649	-0.342289	GO:0004650	/
BraA01g024002E	7.731	5.301	7.65	19.738	53.657	28.341	33.013	105.4	74.295	5.375	6.027	5.44	4.253	5.923	5.331	47.403	6.145	8.059	0.326467	2.76877	1.86531	GO:0004842	/
BraA02g030020E	0.796	0.597	0.401	2.715	9.421	4.741	4.616	22.965	12.84	0.199	0.291	0.1	0.299	0.611	0.397	4.566	0.197	0.394	1.62967	3.75071	3.05193	GO:0030001	/
BraA01g024843E	1.947	1.558	1.032	0.601	0.313	0.425	0.021	0.194	0.347	3.099	1.962	1.779	1.725	2.688	3.046	0.471	2.208	0.994	-0.556751	-2.46185	-2.62699	/	/
BraA02g031612E	0.053	0.074	0.032	0.043	0.027	0.016	0.016	0.044	0.056	0.048	0.114	0.181	0.09	0.06	0.026	0.264	0.141	0.157	-1.07679	-1.0222	-2.1941	/	/
BraA01g024095E	4.131	6.319	2.849	4.684	2.472	5.466	3.351	4.526	7.513	5.622	6.346	6.962	8.461	8.219	9.22	9.949	11.16	8.434	-0.476889	-1.02231	-0.866405	GO:0005515	/
BraA03g010310E	1.08	0.793	0.798	1.092	32.724	0.97	1.412	70.613	21.954	0.505	0.352	0.509	0.866	0.369	0.215	0.359	0.783	0.641	1.00252	4.67286	5.83217	/	/
BraA03g008969E	4.585	4.021	8.184	9.329	9.458	8.097	12.526	14.142	14.499	6.518	8.597	8.74	3.602	5.481	3.641	14.41	10.044	9.607	-0.479695	1.10519	0.350052	GO:0004672	/
BraA05g015418E	38.502	20.489	34.945	27.051	13.909	17.325	15.018	7.114	20.454	37.744	53.144	38.297	75.609	130.125	65.531	23.902	76.214	41.675	-0.430364	-2.21342	-1.66461	/	/
BraA03g012224E	1.843	0.825	2.355	1.418	6.836	3.221	0.709	3.81	3.987	0.688	1.182	1.193	1.709	0.986	0.823	0.631	0.652	0.844	0.740773	1.76677	2.08521	GO:0004672	/
BraA01g027031E	6.359	0.934	5.113	59.633	159.395	94.627	127.769	348.083	245.376	1.519	1.538	3.12	3.449	7.352	5.004	105.35	4.44	10.333	1.03857	4.36562	2.65955	/	K09422
BraA09g006604E	39.612	29.629	43.139	42.46	29.845	33.405	23.601	17.133	35.811	24.788	34.836	31.739	71.445	67.832	59.394	47.094	108.038	49.45	0.327713	-0.895425	-1.34504	GO:0003700	/
BraA03g009710E	31.784	36.132	27.446	23.336	23.022	18.004	23.811	32.208	37.462	35.714	42.799	37.455	47.295	45.007	48.37	41.136	47.737	45.304	-0.251409	-1.10366	-0.442061	GO:0016021	/
BraA06g019032E	48.599	34.818	62.058	64.285	48.216	134.674	84.73	27.962	43.297	54.849	59.775	80.645	29.635	38.666	31.547	46.139	99.524	47.148	-0.395098	1.33473	-0.234236	/	/
BraA09g002067E	4.398	2.922	8.153	3.522	3.656	3.428	1.706	4.248	2.942	4.404	1.615	3.48	10.085	4.903	11.089	4.285	2.852	6.72	0.735375	-1.27074	-0.551912	GO:0016491	/
BraA06g023041E	31.309	29.797	21.718	32.887	124.062	55.214	55.612	177.227	80.087	24.559	24.552	19.296	30.842	33.692	33.529	54.929	20.055	17.363	0.308176	1.17555	1.84945	/	K20887
BraA09g005727E	0.554	0.401	5.15	0.903	3.106	1.436	3.558	3.847	2.934	0.74	0.842	0.87	2.932	1.83	1.474	1.137	2.222	1.646	1.33573	-0.142323	1.13031	/	/
BraA06g021989E	0.393	0.272	0.244	0.581	0.247	0.658	0	0.159	0.512	0.182	0.089	0.153	0	0.124	0.091	0.091	0.09	0	1.1407	2.81057	1.9613	GO:0016020	/
BraA03g012734E	21.681	17.422	5.145	14.857	28.206	14.156	6.782	28.776	23.609	34.147	27.041	14.593	74.28	68.366	75.813	13.165	49.147	41.978	-0.739744	-1.8886	-0.722594	GO:0016021	K01535
BraA04g043147E	2.682	2.33	5.403	8.776	4.242	9.655	6.261	7.63	13.22	4.239	5.652	6.338	1.768	1.735	1.619	5.354	9.626	6.634	-0.613218	2.1581	0.402751	/	/
BraA04g041773E	0.217	0.542	0.109	0.164	3.093	0.112	0	5.634	3.214	0	0.106	0.109	0	0.056	0	0.162	0.107	0.268	2.04084	5.93331	4.1397	GO:0003700	/
BraA03g008291E	38.158	7.496	14.025	115.27	185.5	169.024	168.333	274.649	256.555	3.242	4.969	15.496	17.845	50.706	45.849	210.304	36.071	50.847	1.36832	2.08211	1.3065	GO:0003676	/
BraA07g035452E	11.566	11.485	12.107	20.258	31.8	26.872	19.739	53.71	47.988	12.441	15.16	13.755	13.035	13.261	12.457	26.118	16.299	14.126	-0.204356	1.06515	1.18508	GO:0005515	/
BraA08g039454E	40.921	20.877	49.002	47.446	37.553	133.897	84.754	17.785	37.118	36.301	55.379	70.837	16.926	21.841	12.666	37.061	122.62	54.519	-0.524049	2.11851	-0.547298	GO:0016874	K01969
BraA06g022189E	2.791	0.724	3.228	14.004	57.493	35.245	40.946	123.691	60.934	0.517	1.211	1.46	1.761	4.024	3.196	32.605	1.635	4.398	1.10784	3.63514	2.62547	GO:0045087	/
BraA07g034298E	8.446	6.816	1.191	3.188	3.728	1.342	0.987	6.206	2.741	12.571	10.283	8.068	20.031	24.23	26.391	3.878	10.407	17.104	-0.872947	-3.06836	-1.55585	GO:0003677	/
BraA06g022862E	0.729	0.769	1.142	1.207	0.887	1.364	1.42	0.786	1.028	1.236	1.067	1.471	0.649	0.601	0.464	1.293	1.921	1.102	-0.485376	1.03117	-0.341104	GO:0043531	/
BraA06g022756E	27.591	26.431	28.641	32.686	30.734	42.458	19.027	15.772	19.108	28.885	33.243	33.502	14.847	19.881	14.266	21.405	27.776	23.592	-0.179943	1.13817	-0.356219	GO:0003824	/
BraA09g001683E	1.669	0.817	1.556	2.244	2.857	3.772	3.077	2.068	2.255	2.133	2.08	1.612	1.299	1.601	1.168	2.871	4.597	2.301	-0.497026	1.15876	-0.323713	GO:0005515	/
BraA07g036400E	0.471	0.236	2.729	0.714	2.699	0.915	2.065	2.102	1.62	0.472	0.518	0.297	0.295	0.664	0.294	0.764	0.349	0.466	1.43756	1.85034	1.95267	GO:0005515	K00799
BraA07g034782E	2.555	1.601	2.8	4.23	2.774	3.463	2.462	3.772	6.567	2.249	3.373	4.732	1.182	0.949	1.204	3.728	4.94	4.056	-0.544079	1.66504	0.0839436	GO:0008271	K17471
BraA03g011701E	5.626	1.54	1.123	2.737	1.298	5.006	0.767	0.724	2.022	1.488	1.089	1.768	0.426	0.489	0.265	0.742	2.781	1.366	0.971241	2.95646	-0.403432	GO:0003700	K09419
BraA06g020175E	24.56	1.491	6.546	127.227	139.609	143.148	167.264	246.662	276.019	1.731	2.329	6.617	5.137	22.659	21.699	194.522	10.606	36.866	1.64837	3.08505	1.57734	GO:0016787	K07766
BraA03g007802E	2.243	3.22	1.302	1.547	1.344	1.312	1.225	1.468	0.866	3.804	3.401	2.822	4.31	5.19	4.894	4.451	5.45	4.151	-0.534461	-1.75291	-1.89775	GO:0005515	/
BraA01g025091E	1.237	3.479	4.438	1.875	2.48	1.442	3.428	2.758	1.718	5.997	4.529	4.212	3.873	3.801	4.779	3.009	4.889	3.174	-0.65929	-1.07145	-0.403379	GO:0055085	K15277
BraA09g006515E	28.264	17.683	19.235	33.381	118.655	71.463	105.707	127.34	90.272	25.46	39.085	24.568	38.435	40.748	37.667	66.166	32.965	30.278	-0.421026	0.994541	1.39949	/	/
BraA03g010721E	4.533	7.455	4.048	6.771	7.802	6.905	5.172	7.57	10.504	6.533	8.016	7.312	22.026	13.195	13.494	8.502	10.93	10.976	-0.416144	-1.1548	-0.309425	/	/
BraA06g019422E	10.252	5.478	89.471	14.252	8.901	18.272	5.128	7.582	12.536	9.876	8.875	14.852	3.152	3.541	3.795	3.799	7.447	3.804	1.66756	2.00068	0.823692	GO:0006520	K01620
BraA03g009091E	4.034	2.311	2.73	11.396	36.957	19.598	39.3	78.814	49.87	2.528	2.346	1.896	2.901	9.151	3.532	34.677	2.892	2.56	0.454981	2.18285	2.13923	/	/
BraA08g037937E	11.475	14.595	1.651	7.624	14.863	13.082	9.639	17.035	12.492	15.1	20.012	18.859	39.427	38.463	31.879	39.601	39.051	45.581	-0.926125	-1.58577	-1.58132	/	/
BraA08g040067E	9.839	6.49	21.021	10.913	6.073	14.478	6.371	4.908	6.454	6.632	8.41	10.204	4.725	4.711	3.808	6.515	4.179	6.458	0.591059	1.26379	0.120785	GO:0008483	K00827
BraA04g042999E	32.96	40.433	21.175	18.246	18.11	14.168	31.215	25.693	23.447	26.238	26.86	20.666	62.271	49.881	52.108	35.437	31.672	32.722	0.390881	-1.6775	-0.23567	/	K12386
BraA02g031123E	29.194	33.116	35.973	13.95	15.805	13.502	27.246	16.473	23.503	18.735	35.221	23.007	35.963	33.007	30.001	21.754	19.492	22.384	0.379877	-1.16664	0.151272	GO:0015267	K09874
BraA06g021966E	56.702	31.16	18.983	38.764	69.456	57.929	79.335	85.784	73.453	30.909	21.075	23.496	35.611	37.291	33.86	49.816	21.177	30.174	0.538321	0.680698	1.31347	GO:0008152	K00294
BraA03g012226E	0.802	0.678	1.67	2.343	11.278	3.233	8.018	6.587	6.245	1.017	2.472	1.673	1.519	0.712	0.729	1.922	2.943	1.182	-0.689307	2.57334	1.86479	GO:0004672	/
BraA09g004076E	12.303	9.649	17.238	56.307	91.84	80.159	34.964	101.466	119.214	10.644	11.287	9.432	10.743	11.565	18.404	50.407	15.614	23.403	0.350026	2.53086	1.59041	GO:0006629	/
BraA02g030367E	6.514	6.276	4.566	5.281	2.813	2.24	0.836	3.151	4.416	6.311	8.179	7.725	16.666	14.917	13.082	9.199	6.973	11.466	-0.324677	-2.10838	-1.63898	GO:0046983	/
BraA03g011730E	1.039	0.308	0.892	3.034	20.97	10.807	2.501	17.569	9.326	0.27	0.301	0.582	1.041	1.774	1.535	7.72	0.304	1.485	0.990075	3.07236	1.712	GO:0004842	/
BraA01g028075E	18.437	13.306	21.824	10.985	29.179	22.111	11.14	17.763	12.823	26.766	18.328	24.984	51.272	41.086	44.588	15.972	22.324	20.068	-0.356012	-1.08603	-0.397834	GO:0005515	K00799
BraA03g013149E	6.248	3.312	6.717	7.024	12.873	12.807	10.582	13.411	10.166	2.474	4.326	4.564	3.505	5.16	2.651	8.704	4.886	6.09	0.546833	1.57333	0.875484	/	/
BraA09g005469E	12.109	6.289	7.617	12.418	56.69	25.31	32.155	103.357	60.185	4.931	8.176	6.256	4.616	11.19	5.605	36.783	8.161	6.593	0.45663	2.20667	2.00712	GO:0004672	K13412
BraA07g036230E	0.913	0	0.057	3.116	7.732	5.56	8.831	22.046	11.899	0.057	0.056	0.058	0.057	1.813	0.683	6.95	0.113	0.847	2.55027	2.73958	2.51165	/	/
BraA07g035972E	0.882	0.294	0.415	2.736	4.075	3.475	4.188	15.068	8.157	0.177	0.23	0.297	0.177	0.784	0.352	5.99	0.64	1.339	1.21204	3.012	1.8652	/	/
BraA04g041945E	5.175	6.336	6.147	4.529	9.993	7.285	2.629	6.243	4.496	2.939	6.186	3.43	2.941	2.849	2.003	2.544	2.748	2.522	0.518489	1.52933	0.860991	/	/
BraA01g028150E	2.052	4.106	1.539	6.659	13.078	9.2	0.837	7.665	6.364	3.918	3.403	4.527	4.83	2.396	3.665	4.526	5.283	5.714	-0.588913	1.45222	0.0288298	/	/
BraA02g032042E	11.531	9.538	10.41	15.747	19.68	14.694	26.47	35.632	30.432	7.897	9.409	9.521	7.404	9.667	8.065	24.966	7.648	8.99	0.261425	1.02762	1.22801	/	/
BraA09g005721E	23.345	10.83	20.821	35.782	37.939	60.141	23.149	48.308	64.956	11.352	16.225	13.785	12.506	13.593	11.857	25.386	15.838	13.595	0.440616	1.84905	1.39037	GO:0008152	/
BraA07g036324E	0.404	0.093	0.814	0.377	2.659	0.483	0.737	5.023	1.414	0.187	0.243	0.125	0.093	0.191	0.186	1.923	0.184	0.246	1.26413	2.98085	1.70096	GO:0016020	K14638
BraA03g009347E	3.855	4.174	4.096	4.004	2.098	4.981	0.981	1.164	1.453	1.851	3.146	3.89	1.164	1.569	1.053	2.109	1.931	1.672	0.478045	1.56491	-0.59097	GO:0009058	/
BraA05g014178E	32.804	5.144	13.541	70.098	198.883	159.006	204.582	261.739	211.092	8.983	10.979	11.273	14.678	27.107	23.201	141.853	16.125	21.617	0.755463	2.77523	1.98471	GO:0016757	/
BraA09g006968E	5.506	4.452	6.471	13.592	7.992	10.747	2.982	9.536	14.131	3.032	3.674	5.649	4.23	2.915	5.079	5.542	7.891	4.631	0.441581	1.41549	0.640524	GO:0016491	/
BraA06g020264E	0.249	0.107	0.072	0.036	1.777	0.111	0.073	1.831	0.678	0	0.07	0.036	0.535	0.036	0	0.036	0	0.035	2.04546	1.83117	5.29372	GO:0004499	K00485
BraA05g017907E	11.589	6.314	10.304	13.642	7.205	22.612	8.194	4.683	8.062	9.533	12.859	16.801	6.216	6.243	4.666	9.341	18.338	11.79	-0.44385	1.36088	-0.840673	GO:0004525	K11145
BraA09g006614E	58.78	48.892	54.956	97.237	63.265	100.617	57.273	90.047	108.822	51.412	71.567	78.277	42.197	49.58	39.402	92.387	90.108	72.033	-0.277252	1.0093	0.0874325	/	/
BraA06g020765E	20.28	11.785	24.593	11.97	19.047	27.943	57.803	8.306	17.679	13.262	39.984	32.856	4.376	5.074	1.929	11.058	36.151	8.091	-0.577899	2.41086	0.66758	GO:0004066	K01953
BraA01g025093E	0.908	0.13	0.49	0.262	1.388	0.403	0.134	0.034	0.412	0.195	0.127	0.36	0.098	0.133	0.032	0.421	0.224	0.193	1.20171	3.03294	-0.476079	GO:0006855	K03327
BraA10g047743E	2.729	2.464	5.383	3.908	70.111	6.442	14.935	38.946	22.021	1.024	1.74	3.71	9.837	2.951	3.666	4.615	7.904	7.275	0.735852	2.37405	2.03352	GO:0005506	/
BraA02g028587E	56.696	23.583	21.919	18.751	13.084	10.465	7.671	19.646	14.308	26.902	19.97	26.433	33.447	60.125	64.969	19.399	37.542	38.962	0.515806	-1.89042	-1.11239	/	/
BraA03g007667E	116.461	93.631	172.278	181.51	226.793	277.399	194.081	258.874	242.417	148.914	160.427	178.065	81.818	89.744	77.263	194.447	202.543	202.147	-0.321521	1.49633	0.296298	GO:0004470	K00029
BraA07g037575E	0.107	0.036	0.252	0.217	2.622	0.148	0.922	3.715	2.156	0.072	0	0	0.107	0.037	0.143	0.214	0.106	0.035	2.49984	3.46632	4.34757	GO:0016747	/
BraA05g018070E	14.134	8.945	13.739	18.673	48.578	34.586	12.578	33.892	30.348	8.816	11.643	9.205	11.132	9.67	10.403	14.425	10.534	9.696	0.341006	1.75791	1.23176	GO:0016020	K08486
BraA01g027794E	4.248	2.942	2.424	5.466	14.163	8.375	7.539	27.441	10.941	3.093	1.654	2.338	2.798	3.409	3.496	7.829	2.701	2.851	0.476248	1.58194	1.87028	/	/
BraA09g005422E	0.735	0.294	0.074	0.074	0.075	0	0	0.154	0	0	0	0.222	1.031	0.452	1.099	0.073	0.073	0.145	2.35741	-4.08548	/	GO:0003677	/
BraA04g043070E	0.145	0.364	0.146	0.588	2.888	0.075	0.075	4.12	6.231	0.073	0	0.073	0.073	0	0.072	0.145	0.144	0.216	2.20814	4.67595	4.4496	GO:0003700	/
BraA07g034611E	2.028	3.623	2.457	4.541	13.307	5.806	2.341	17.844	17.914	2.055	2.099	2.169	3.097	1.559	1.734	2.555	3.031	2.652	0.38969	1.94058	2.29709	GO:0004573	K01228
BraA03g009071E	107.934	98.223	526.894	340.029	87.431	286.744	524.097	235.863	379.02	368.31	716.744	496.186	74.623	82.981	57.725	364.763	619.183	343.198	-1.08918	1.72526	-0.148901	/	/
BraA03g012381E	4.04	3.491	5.821	7.041	19.27	8.404	17.779	59.552	27.182	3.083	4.346	3.25	3.115	3.459	3.142	14.482	4.594	4.837	0.349428	1.89151	2.21635	GO:0004601	K13447
BraA01g024697E	10.167	12.205	7.369	16.104	25.374	20.781	27.764	50.069	41.516	12.752	11.17	13.594	16.132	14.67	18.391	24.836	15.744	18.36	-0.30196	0.379477	1.09979	GO:0046856	/
BraA05g017407E	19.487	10.94	23.351	22.49	83.503	67.276	34.566	29.335	29.281	17.452	28.891	27.636	30.675	19.679	16.265	17.587	32.751	20.856	-0.432221	1.43404	0.468569	GO:0016491	/
BraA02g031911E	0.151	0.423	0.152	0.519	0.461	0.595	1.059	0.38	0.575	0.363	0.383	0.67	0.182	0.155	0.151	0.814	0.477	0.508	-0.931297	1.71681	0.232018	GO:0016020	/
BraA05g017716E	3.078	0.362	3.222	0.61	2.398	0.563	256.39	3.548	1.725	4.532	8.193	1.462	21.108	11.873	12.82	19.46	16.704	3.285	-1.06527	-3.6263	2.78434	/	/
BraA06g022271E	1.842	0.614	4.741	1.5	7.27	1.617	2.137	5.209	5.496	0.871	1.249	1.858	0.333	1.284	0.791	0.715	0.379	0.936	0.87987	2.18082	2.74217	GO:0004612	K01610
BraA08g039000E	27.215	15.546	35.046	41.552	14.866	24.69	16.112	20.452	40.241	19.192	65.638	35.424	23.399	28.692	14.632	57.562	90.526	84.769	-0.604038	0.276387	-1.52581	/	/
BraA02g028621E	0.304	0.434	1.749	0.658	1.127	2.181	0.895	1.048	1.309	1.13	2.268	1.248	0.457	0.4	0.39	0.65	2.338	0.73	-0.881985	1.71045	-0.110669	GO:0004806	K14674
BraA08g038237E	4.685	0.879	2.556	11.249	33.306	19.724	18.122	68.126	42.453	0.684	0.763	2.561	1.663	5	5.256	22.017	3.087	5.698	1.05471	2.49074	2.14475	/	/
BraA05g015966E	0.744	0.298	0.225	2.407	5.685	3.47	3.608	11.403	5.04	0.074	0.073	0.3	0.522	0.915	1.187	4.234	0.588	0.957	1.54169	2.18982	1.88025	/	/
BraA08g041071E	7.272	9.948	7.017	11.205	12.45	18.342	14.28	7.909	7.65	12.017	8	10.963	6.321	6.912	5.373	10.101	6.755	10.1	-0.320974	1.20514	0.219755	GO:0016787	/
BraA08g041373E	1.173	1.593	1.604	5.763	26.556	13.465	204.585	72.852	37.525	1.343	3.029	2.622	3.36	3.263	3.177	68.778	5.882	6.469	-0.650982	2.28753	2.01524	GO:0009269	/
BraA01g024133E	10.016	13.082	6.867	5.274	1.842	2.091	0.861	1.387	3.313	8.775	6.318	8.213	16.311	6.2	11.793	8.749	9.9	17.62	0.396827	-1.90539	-2.63357	GO:0009733	K14488
BraA06g020135E	2.255	2.076	3.193	5.418	31.09	12.496	22.197	87.788	42.986	1.701	2.17	2.226	1.277	2.729	1.466	24.675	2.535	1.972	0.331784	3.23293	2.47197	GO:0004672	/
BraA02g032536E	31.871	11.934	13.792	104.946	171.572	176.152	149.675	242.637	221.58	7.272	7.867	22.078	17.072	36.804	47.544	147.909	36.68	53.185	0.665891	2.20391	1.44265	GO:0005509	/
BraA03g008827E	143.471	95.387	115.214	68.641	61.259	90.072	48.934	43.811	79.628	124.881	156.545	149.909	133.458	152.978	118.573	97.579	225.953	108.072	-0.253837	-0.85581	-1.24861	/	/
BraA02g029558E	3.286	3.089	3.173	4.434	7.424	10.396	0.242	2.243	3.334	4.193	5.489	2.755	3.776	2.936	2.673	1.011	3.993	2.163	-0.35226	1.28538	-0.214398	GO:0004672	/
BraA05g017736E	3.503	0.839	14.363	3.092	5.176	9.612	18.83	4.868	5.9	2.47	3.469	3.485	1.681	2.173	0.541	6.008	6.778	2.197	1.01035	2.06289	1.04913	GO:0003677	/
BraA04g044713E	1.143	1.48	1.321	2.04	1.13	1.394	2.255	1.906	2.207	1.01	0.558	1.222	0.741	0.655	0.57	3.222	1.994	1.764	0.53378	1.22586	-0.0589744	GO:0000160	K12128
BraA09g005331E	4.781	4.592	4.991	6.883	19.464	11.831	13.277	25.893	14.538	4.249	4.348	4.353	3.75	4.969	4.993	13.453	4.178	4.679	0.180214	1.53296	1.3496	GO:0004672	/
BraA03g009725E	1.181	0.96	2.305	2.91	0.677	3.901	1.979	1.007	3.515	1.404	3.099	2.83	0.37	0.756	0.368	2.578	2.991	1.168	-0.697153	2.3335	0.0131355	GO:0005509	/
BraA06g020149E	0.597	0.334	0.313	0.603	2.091	0.866	0.32	2.531	1.592	0.311	0.187	0.265	0.287	0.245	0.333	0.524	0.354	0.283	0.742273	2.09907	2.02712	GO:0005515	/
BraA08g040802E	0.812	1.182	1.153	1.904	1.542	1.798	3.085	3.178	3.673	1.331	1.406	1.677	1.147	1.135	1.546	1.916	1.46	1.425	-0.457592	0.475621	1.12552	GO:0005634	K06627
BraA02g029007E	6.407	5.485	2.063	3.272	1.144	2.122	1.704	0.971	1.538	8.994	4.838	7.666	8.738	8.054	8.564	4.088	7.835	5.882	-0.58576	-1.95025	-2.00323	GO:0003700	K09286
BraA10g046761E	5.88	3.457	10.965	11.163	10.036	25.073	11.992	5.63	12.042	8.336	9.841	10.825	3.598	4.369	3.066	6.385	13.199	10.815	-0.48778	2.09772	0.0360158	/	K06617
BraA03g011481E	0.805	0.429	0.595	1.411	3.225	1.502	2.159	9.914	5.793	0.269	0.472	0.271	0.484	0.77	0.268	1.5	0.477	0.319	0.88307	2.05978	3.04747	GO:0003677	/
BraA07g034573E	10.078	8.764	5.545	8.7	13.189	11.007	55.661	18.31	28.553	11.41	8.783	12.282	19.111	14.138	13.298	16.251	8.276	13.961	-0.378524	-0.466242	1.47848	/	/
BraA05g014537E	22.755	4.187	20.849	96.02	152.753	150.486	190.565	221.558	201.838	4.689	11.03	13.543	5.06	26.377	12.456	149.682	23.148	30.208	0.736276	3.22795	1.66529	GO:0006952	/
BraA04g041877E	0.987	0.781	1.064	2.321	6.314	2.879	6.963	8.242	7.629	1.632	0.987	1.274	1.242	1.294	0.801	3.873	1.861	2.067	-0.42632	1.83816	1.62576	GO:0005524	/
BraA04g043809E	4.793	3.142	3.414	14.261	34.491	25.211	17.506	48.495	41.198	4.468	5.112	4.698	4.748	4.798	5	20.57	7.761	8.369	-0.299761	2.39654	1.62664	GO:0004672	/
BraA09g005336E	103.718	47.594	79.683	287.539	457.268	403.568	386.532	644.015	640.957	56.521	62.596	66.271	77.312	131.688	107.478	456.011	103.224	119.375	0.348928	1.90079	1.37254	GO:0005515	/
BraA02g032606E	23.852	19.831	37.825	30.942	48.692	35.973	31.337	75.171	57.875	16.892	25.308	22.982	15.638	20.853	14.714	32.231	31.69	25.979	0.349334	1.21364	0.957453	GO:0004601	K13447
BraA02g031176E	1.618	0.524	14.092	4.041	1.454	9.172	2.749	1.748	2.921	1.334	2.835	3.073	0.477	1.95	0.664	1.9	3.762	3.296	1.18244	2.2673	-0.197296	/	/
BraA06g021949E	2.889	1.626	3.456	5.05	3.494	3.929	4.408	1.958	3.758	2.711	4.878	4.008	1.749	2.651	1.38	5.287	13.741	4.645	-0.513968	1.12647	-1.15215	GO:0003677	K16222
BraA04g041701E	6.384	6.795	7.475	11.784	13.215	13.656	5.437	20.714	19.291	7.334	7.951	8.485	6.649	5.77	6.101	7.892	8.125	7.466	-0.172568	1.09071	1.03892	/	K01408
BraA10g046115E	3.422	3.216	3.395	2.412	1.849	1.236	2.407	2.504	2.47	3.011	2.279	2.826	3.897	2.975	5.068	2.381	1.64	3.848	0.338538	-1.10112	-0.0140349	/	/
BraA02g031432E	1.468	0.95	1.609	1.659	10.82	4.564	5.79	21.527	8.499	0.821	1.265	0.654	1.038	1.106	0.947	3.319	1.451	1.025	0.582528	2.5325	2.72039	GO:0003700	/
BraA09g005778E	10.16	16.545	4.391	4.342	3.167	1.296	3.108	3.634	2.035	5.423	8.358	7.86	5.557	11.658	5.722	4.191	5.101	5.962	0.555482	-1.37096	-0.711808	GO:0005506	/
BraA05g014659E	8.993	10.662	15.938	17.005	19.509	25.285	21.216	28.756	24.675	12.005	17.646	17.057	9.429	10.408	8.304	20.946	24.691	16.314	-0.365015	1.16566	0.351127	/	/
BraA08g040710E	7.869	2.862	4.193	21.237	43.193	39.765	38.641	41.571	35.239	2.344	2.54	5.053	6.256	14.858	12.517	36.547	8.035	13.32	0.621342	1.68028	1.06764	/	/
BraA07g037136E	11.128	7.647	3.85	3.864	2.405	6.058	0.232	2.006	1.666	4.164	3.842	7.26	10.364	12.669	7.399	3.591	3.556	4.56	0.604009	-1.2849	-1.49839	/	/
BraA06g021858E	1.686	1.125	1.86	3.572	4.09	3.245	4.059	5.057	6.628	3.135	1.647	2.35	1.529	1.645	2.002	3.847	2.778	1.668	-0.577429	1.10364	0.999064	/	/
BraA02g030276E	15.101	17.795	14.251	31.643	20.283	27.343	5.326	26.505	29.531	16.287	17.373	23.911	6.804	9.856	8.147	14.262	27.301	22.186	-0.256543	1.6913	0.0325523	GO:0005506	K10717
BraA08g040883E	9.307	12.336	23.569	8.939	3.266	5.868	5.307	6.214	5.636	14.598	36.331	16.018	9.845	13.615	10.106	18.838	12.802	16.602	-0.544303	-0.893715	-1.41307	GO:0005506	/
BraA03g013181E	6.765	4.93	5.357	18.972	57.887	36.646	59.481	125.608	67.595	6.132	7.178	7.445	7.003	21.166	5.997	49.303	10.21	8.706	-0.252254	1.78739	1.9691	/	K19366
BraA09g006585E	2.466	1.927	0.776	1.246	2.59	1.757	1.749	1.375	0.897	3.626	2.709	2.022	5.714	4.658	6.378	1.538	3.275	2.592	-0.657504	-1.54307	-0.797725	/	/
BraA02g029239E	1.375	1.562	1.995	3.156	9.303	2.994	6.177	21.667	11.687	0.84	1.479	1.434	1.564	2.315	1.301	7.837	2.049	1.913	0.421489	1.6325	1.82933	GO:0005515	/
BraA04g044085E	11.231	5.264	11.512	17.747	20.682	19.617	22.24	29.803	32.584	4.993	7.095	8.877	7.753	7.283	7.911	18.502	8.501	11.23	0.447452	1.369	1.22128	/	/
BraA03g007610E	3.842	4.335	3.377	3.554	1.999	1.44	3.289	4.505	4.889	8.431	4.671	3.259	7.005	4.858	9.661	4.692	3.798	4.692	-0.468167	-1.61386	0.0223886	GO:0006855	K03327
BraA06g022879E	39.409	19.845	25.793	75.677	116.29	101.097	126.656	212.779	184.641	21.344	23.61	24.129	19.879	35.121	29.279	130.797	25.359	32.139	0.332301	1.83851	1.54997	/	/
BraA06g019531E	0.881	0.716	0.499	2.728	7.911	4.167	2.727	18.095	8.976	0.386	0.43	0.445	0.552	1.411	0.879	4.068	0.327	1.144	0.766399	2.4379	2.51473	GO:0006351	/
BraA01g024187E	21.043	15.052	13.457	26.539	78.174	42.911	70.309	81.72	54.499	18.695	17.956	25.729	20.692	24.872	23.421	41.473	32.264	23.345	-0.298687	1.15377	1.17038	GO:0008152	/
BraA01g027027E	2.414	2.192	2.694	4.581	4.691	3.965	4.866	10.097	8.647	2.305	3.7	3.56	1.861	1.75	1.593	4.226	2.239	3.969	-0.36118	1.37199	1.26029	GO:0005515	/
BraA04g042035E	54.855	22.251	50.189	77.221	56.615	108.922	74.586	59.847	82.295	40.036	62.825	74.354	18.925	35.934	23.437	64.812	102.933	73.738	-0.447571	1.65562	-0.0798556	GO:0003677	/
BraA01g027268E	2.459	0.703	0.059	1.066	0.477	0.364	0	0.369	0	0.235	0	0.768	1.408	2.22	2.102	0.351	0.405	1.738	1.73044	-1.57822	-2.64019	/	/
BraA05g014521E	36.13	17.929	24.962	84.987	87.094	100.407	57.635	108.589	139.153	19.412	22.766	22.301	27.068	36.561	38.322	92.983	38.077	38.023	0.325234	1.44805	0.925648	GO:0005515	/
BraA08g040590E	0.721	0.624	1.649	1.22	1.201	0.733	1.317	0.772	1.116	1.667	1.571	1.12	2.405	1.762	1.881	1.772	3.003	2.581	-0.514753	-0.917294	-1.1235	/	/
BraA02g030022E	0.962	0.321	0.646	3.134	12.956	5.428	6.725	28.607	19.568	0.428	0.209	0.216	0.428	0.657	1.066	5.441	0.317	0.74	1.21255	3.3868	3.1575	GO:0030001	/
BraA07g037670E	37.843	35.642	118.835	114.62	80.299	232.746	26.732	47.547	135.273	67.507	98.347	118.759	28.165	38.537	12.128	41.208	126.2	67.678	-0.541484	2.46157	-0.0926641	GO:0004427	K01507
BraA09g004539E	25.23	8.027	12.239	71.642	139.795	102.928	138.766	241.412	189.972	9.222	13.245	10.806	11.637	36.388	24.373	125.421	18.572	25.05	0.483983	2.16638	1.82721	/	/
BraA05g015421E	0.117	0.117	1.116	0.53	13.478	1.148	2.706	8.871	2.406	0.058	0.114	0.294	0.175	0.299	0.291	0.815	0.173	0.231	1.55529	4.40357	3.6161	/	/
BraA07g037280E	1.865	2.212	3.918	4.767	3.039	4.252	2.776	4.446	4.765	2.907	3.877	4.006	1.628	2.429	1.7	2.367	4.292	2.979	-0.405727	1.08251	0.397422	/	/
BraA04g043477E	8.106	4.884	10.124	10.879	29.456	27.02	24.89	32.441	19.716	8.02	11.712	10.858	5.938	6.605	5.342	15.662	13.681	12.289	-0.37636	1.96452	0.972345	/	/
BraA01g027905E	3.033	3.425	2.723	4.555	7.863	8.031	0.713	15.447	15.48	5.142	2.493	4.637	2.919	2.708	3.175	1.919	1.722	3.031	-0.383883	1.25727	2.33437	GO:0004185	K16296
BraA02g032437E	18.323	12.37	14.042	43.414	40.308	52.368	57.053	68.791	77.628	16.713	19.706	17.923	17.123	28.563	21.356	59.134	29.778	30.755	-0.249501	1.04821	0.839637	/	/
BraA01g026828E	0.247	0.541	0.483	0.719	2.597	0.609	0.797	0.924	0.654	0.433	0.77	0.686	0.418	0.38	0.231	1.218	0.733	0.581	-0.544737	1.99016	-0.0131434	GO:0004185	K16297
BraA06g021887E	0.352	0.604	0.203	0.407	5.711	0.912	1.452	9.342	1.862	0.151	0.295	0.228	0.353	0.386	0.15	1.255	0.373	0.199	0.811185	3.06442	2.89304	GO:0005544	/
BraA10g044882E	63.044	56.262	131.026	116.752	59.134	149.863	34.285	29.892	38.725	62.31	148.351	145.342	32.066	42.023	28.827	60.534	99.47	79.38	-0.483682	1.67609	-1.14048	GO:0004553	/
BraA06g020485E	0.958	0.766	1.158	2.066	3.902	3.904	3.556	4.021	4.324	0.32	0.686	0.773	0.832	0.916	0.891	3.633	1.578	1.2	0.724556	1.94478	0.966103	GO:0005509	K13448
BraA02g030753E	2.325	1.593	4.786	2.478	1.802	2.41	1.825	1.194	2.059	1.341	2.443	2.295	0.988	1.269	1.134	2.094	3.047	2.476	0.542486	1.00055	-0.511288	/	/
BraA02g031005E	28.205	32.954	17.691	16.441	19.426	17.071	17.596	23.404	21.114	24.127	21.038	20.512	62.243	45.388	51.535	32.883	29.495	30.481	0.297144	-1.55898	-0.499559	GO:0004619	K01834
BraA09g004948E	67.175	45.839	135.646	99.626	73.039	177.013	123.336	39.265	66.702	89.786	120.132	132.323	48.928	57.508	39.486	73.273	146.1	87.931	-0.434827	1.28437	-0.351975	GO:0016627	K00232
BraA05g017556E	28.374	23.315	20.607	39.303	52.878	47.7	58.916	80.85	61.929	21.114	21.701	21.555	18.095	31.066	19.632	52.131	20.263	21.226	0.199679	1.05914	1.18457	GO:0005783	/
BraA03g012132E	1.194	0.512	3.008	1.466	4.345	4.067	0.44	0.179	0.271	0.427	0.333	1.549	0.513	1.311	0.34	0.17	1.602	0.422	1.05838	2.2435	-1.22162	/	/
BraA09g005751E	2.534	4.454	5.434	8.015	6.269	4.502	14.414	13.869	8.543	5.944	5.833	4.603	2.322	2.782	2.094	10.587	4.329	4.943	-0.371152	1.40061	0.967941	GO:0006629	K13076
BraA02g031119E	9.99	8.269	15.309	18.97	55.93	23.493	39.601	122.661	80.738	8.97	10.698	8.086	10.57	13.63	10.823	35.451	9.824	10.186	0.302027	1.54671	2.2136	GO:0016020	/
BraA07g037642E	9.245	8.39	14.21	17.537	47.282	14.965	49.502	69.979	38.481	12.261	14.706	12.647	16.093	16.454	14.542	33.535	16.674	17.871	-0.287124	0.814598	1.29698	GO:0003824	K09753
BraA02g033162E	1.143	0.416	1.988	1.785	2.434	3.445	2.143	3.925	2.309	1.872	2.435	1.782	0.312	0.426	0.414	1.763	2.567	1.336	-0.753865	2.76855	0.651409	/	/
BraA04g043423E	24.79	14.852	19.502	34.92	56.04	46.102	22.671	55.347	54.831	21.027	25.516	25.719	18.841	24.657	17.889	37.702	28.991	23.786	-0.257857	1.19834	0.635726	/	/
BraA02g028662E	21.135	1.048	3.212	50.243	113.497	118.87	173.293	172.795	174.078	1.733	3.47	5.01	4.61	11.387	6.405	147.5	9.455	20.192	1.35204	3.70687	1.61797	GO:0003700	K09286
BraA03g010495E	1.036	0.777	0.087	1.571	4.926	3.043	0.089	2.266	3.381	0.086	0.422	0.261	0.865	0.354	0.603	0.086	0	0.342	1.33543	2.43881	3.82484	/	/
BraA04g043530E	4.311	3.748	5.222	6.564	7.45	9.522	5.268	5.361	7.279	4.419	5.589	6.241	2.906	4.365	3.839	4.842	7.026	5.739	-0.261536	1.11547	0.101471	/	/
BraA04g044165E	6.317	5.145	6.78	7.382	8.44	9.903	29.767	12.229	12.129	4.322	4.991	6.247	4.39	3.48	4.274	11.313	6.966	5.654	0.259827	1.11291	1.24549	GO:0046856	/
BraA03g007414E	14.157	10.091	15.222	21.01	24.522	35.896	7.369	13.134	16.77	9.709	11.966	12.146	12.235	11.134	9.585	7.217	13.095	12.723	0.252508	1.33674	0.25586	/	K14496
BraA07g034523E	51.696	40.215	107.692	93.611	52.207	99.045	23.763	38.602	50.744	60.208	102.41	112.772	27.66	31.789	26.063	45.419	66.655	65.032	-0.439037	1.53098	-0.566773	/	/
BraA07g036762E	1.504	0.484	0.812	2.389	6.949	2.616	41.39	11.276	7.958	0.376	0.315	0.921	0.754	1.541	1.393	9.758	0.796	1.329	0.832103	1.75431	2.40677	/	/
BraA05g016657E	29.661	30.197	42.792	35.285	17.284	14.034	20.454	32.742	44.273	37.686	48.214	37.252	50.967	51.036	56.789	54.148	40.313	51.721	-0.234818	-1.25358	-0.508594	GO:0008168	K21484
BraA04g042957E	1.206	0.381	2.493	0.642	0.776	1.513	0.982	0.333	0.269	0.381	1.178	0.64	0.064	0.065	0.19	0.823	0.815	0.691	0.912486	3.23312	-0.481345	/	K01602
BraA09g004561E	2.229	2.456	3.306	4.027	17.071	8.36	10.466	36.075	19.115	2.984	4.012	3.008	4.242	3.362	2.923	7.827	4.729	4.015	-0.296623	1.54558	2.07699	/	/
BraA04g044547E	11.8	5.982	2.736	5.677	7.789	6.434	5.298	5.031	6.087	6.513	3.945	3.893	23.262	10.056	16.275	5.833	7.4	7.43	0.554282	-1.2847	-0.254428	GO:0005515	/
BraA05g018116E	18.444	13.839	30.377	31.167	19.053	53.536	54.142	20.449	36.794	19.66	32.485	30.586	17.809	16.881	14.054	44.477	61.3	61.007	-0.374515	1.10999	-0.5128	/	/
BraA08g040678E	1.492	0.912	2.867	2.906	3.603	6.845	1.967	2.03	3.48	1.743	3.4	2.621	0.997	1.019	0.634	1.462	3.961	1.121	-0.534219	2.36708	0.269667	/	K02552
BraA01g027733E	1.348	2.085	1.729	3.842	2.872	4.002	0.759	0.901	2.725	1.902	2.454	2.722	1.966	1.382	1.956	1.04	5.392	1.395	-0.425487	1.03395	-0.762363	/	/
BraA03g011214E	3.687	2.944	2.453	0.821	5.513	0.876	6.211	9.729	2.399	3.285	2.147	1.673	3.119	6.516	5.161	2.127	1.237	1.205	0.388418	-0.959623	2.09589	/	K01251
BraA03g008234E	70.96	46.894	110.79	136.293	68.638	206.091	51.026	46.907	112.706	73.936	105.558	120.571	50.467	68.27	35.93	68.103	148.84	131.324	-0.364878	1.4251	-0.652778	GO:0008270	K10144
BraA02g032715E	4.227	2.567	7.35	12.159	24.297	25.971	20.296	36.393	33.232	3.728	3.047	3.707	3.177	3.918	2.208	27.476	7.461	6.274	0.461053	2.79056	1.19973	/	K09422
BraA07g036889E	3.37	1.798	2.641	2.234	7.515	4.58	8.267	11.164	6.698	3.899	3.511	2.834	4.766	4.336	4.743	5.271	4.294	3.668	-0.359913	0.10592	1.0656	GO:0004672	K04733
BraA05g016665E	8.988	9.873	4.296	3.314	4.057	5.991	3.127	1.628	1.529	13.727	10.464	7.363	14.34	12.531	15.325	5.066	7.455	6.975	-0.411805	-1.62615	-1.55601	GO:0003700	/
BraA09g004103E	1.264	0.575	1.273	4.878	12.638	5.298	8.354	11.696	10.638	0.345	1.066	0.464	0.403	1.824	1.088	7.855	2.214	2.273	0.754932	2.83889	1.38793	/	/
BraA10g047079E	19.105	18.205	10.569	21.084	7.983	16.982	14.765	14.888	20.905	23.796	17.014	19.933	32.191	15.195	31.647	42.732	49.611	59.405	-0.308546	-0.776658	-1.50952	GO:0003700	/
BraA01g025534E	11.079	7.922	12.222	15.681	20.87	19.124	17.986	36.527	26.872	11.31	13.055	13.123	8.008	7.964	9.455	17.948	15.187	10.891	-0.234096	1.16544	0.97142	/	/
BraA02g029631E	27.217	13.715	19.249	55.852	81.151	73.827	63.807	113.37	108.503	13.697	19.478	16.311	15.561	21.262	19.544	63.385	18.401	19.649	0.313089	1.94152	1.56818	GO:0000145	/
BraA03g008213E	0.386	0.386	0.065	0.456	3.737	0.667	1.262	21.485	7.357	0.064	0.189	0.065	0.194	0	0.128	1.349	0.254	0	1.42482	3.98674	4.32431	GO:0003677	/
BraA07g037640E	12.563	6.543	7.149	44.776	86.205	60.172	79.975	147.354	111.14	6.433	7.362	7.8	7.688	15.8	11.859	74.44	7.47	12.128	0.314851	2.48171	1.92044	GO:0006284	K01246
BraA04g041735E	50.834	26.515	43.862	11.436	9	6.174	21.784	25.257	24.049	76.662	43.796	38.905	19.15	33.946	45.757	9.955	40.224	16.524	-0.361314	-1.87322	0.178394	GO:0003677	/
BraA07g034749E	2.575	2.106	2.504	3.011	5.315	4.897	3.812	6.347	4.811	2.466	2.974	3.277	2.401	2.271	2.122	3.934	2.568	1.861	-0.248322	1.00127	0.921452	/	/
BraA04g044062E	10.86	8.536	16.174	18.775	13.194	17.102	26.843	19.344	23.684	12.379	15.473	16.486	5.112	7.297	6.282	23.652	29.508	20.213	-0.289838	1.41058	0.0046542	GO:0003677	/
BraA02g029004E	5.535	3.367	8.463	14.709	8.614	18.076	13.86	9.928	20.284	5.654	7.905	9.853	4.516	7.581	3.44	11.829	16.992	15.056	-0.403384	1.42934	0.0778772	GO:0005515	/
BraA05g018039E	9.141	9.865	2.041	3.779	4.082	4.013	2.183	4.254	2.192	5.635	3.122	5.498	9.521	13.287	13.517	2.877	6.899	6.639	0.600432	-1.5845	-0.834012	/	K10355
BraA06g022182E	8.155	8.36	10.796	22.282	57.192	32.97	20.441	81.853	90.519	5.263	7.504	9.59	8.983	7.665	3.428	20.049	25.715	10.47	0.317939	2.53354	1.8618	GO:0003700	/
BraA04g041811E	8.822	5.725	7.206	15.429	1.943	5.19	4.182	5.757	8.328	8.356	10.246	10.587	12.664	11.238	10.701	16.661	22.862	13.449	-0.393305	-0.642541	-1.45977	/	K02934
BraA04g042453E	2.149	1.897	6.367	4.473	9.271	7.205	2.217	10.084	9.632	2.151	2.592	1.913	2.407	3.108	3.151	3.533	2.999	3.752	0.669498	1.31782	1.17783	/	/
BraA07g036919E	1.981	1.589	2.037	4.485	23.288	11.397	14.75	41.864	23.321	1.611	1.753	1.374	1.716	3.255	1.934	15.261	1.591	1.899	0.272486	2.57116	2.17086	/	/
BraA07g034303E	2.434	2.971	1.579	3.712	5.463	4.831	2.383	5.889	4.191	2.478	3.102	3.705	1.695	2.79	2.263	4.324	2.406	2.408	-0.378433	1.09106	0.531863	GO:0008033	K10760
BraA05g014093E	6.853	3.809	3.516	32.079	76.215	55.639	24.875	136.883	91.54	3.113	4.586	3.138	5.024	4.031	6.455	26.985	6.335	6.97	0.419054	3.45281	2.7361	GO:0003700	/
BraA09g006143E	227.779	165.943	156.819	147.704	87.558	29.413	141.74	87.168	108.616	166.316	290.245	223.99	163.826	300.477	220.414	186.317	214.45	103.023	-0.275636	-1.37048	-0.504963	GO:0004512	K01858
BraA03g011123E	1.799	1.458	0.688	0.783	0.974	0.566	1.879	1.243	1.446	2.758	2.023	1.057	2.532	2.029	2.725	2.704	3.308	2.591	-0.530632	-1.62044	-0.837165	GO:0016020	/
BraA09g000904E	25.956	10.775	8.716	2.678	10.253	3.569	0	0	0.187	10.43	0.172	7.217	17.164	13.75	18.138	0.176	0.087	0	1.39411	-1.51147	/	/	/
BraA06g018858E	16.832	13.709	14.436	23.123	19.187	25.617	12.555	28.244	34.702	11.935	14.3	14.366	9.908	7.758	10.952	15.178	15.277	16.253	0.178593	1.26988	0.773135	GO:0004553	K01193
BraA09g002105E	9.982	8.073	9.822	17.147	23.244	28.46	2.874	8.7	8.44	10.24	13.176	9.398	10.058	8.268	9.859	4.239	9.947	7.053	-0.205788	1.32467	0.00338	GO:0005515	/
BraA05g014316E	0.602	0.274	1.268	0.277	2.677	0.567	26.935	4.137	1.159	0.329	0.588	0.276	0.549	0.28	0.437	1.257	0.757	0.217	0.868058	1.55068	3.91432	GO:0004568	K01183
BraA03g011624E	0.454	0.42	0.035	0.035	0.036	0.036	0.505	0.734	0.592	0.21	0.068	0.141	0.42	0.179	0.453	0.279	0	0.795	1.15823	-3.27314	0.850845	GO:0008152	K12356
BraA09g005783E	3.962	5.835	6.818	3.227	0.561	1.711	1.476	0.751	2.504	5.95	6.879	8.052	11.415	7.78	5.707	3.79	9.518	9.093	-0.300796	-2.19513	-2.17314	GO:0009733	K14488
BraA10g047634E	8.161	4.864	5.317	15.182	25.978	18.328	32.121	49.577	32.682	5.327	5.309	5.095	5.663	10.007	8.668	26.057	5.713	7.777	0.25419	1.33276	1.60894	/	/
BraA04g041829E	12.675	19.706	15.789	9.005	0.785	0.888	0.442	0.629	2.085	7.46	20.827	6.136	5.407	8.863	7.772	2.052	13.714	9.915	0.509161	-1.09086	-2.95084	/	/
BraA04g041734E	16.012	17.608	12.498	5.005	4.669	2.787	6.683	10.2	9.896	29.493	14.146	16.159	12.249	19.161	21.576	4.637	25.251	14.091	-0.339718	-2.06382	-0.626996	GO:0003677	/
BraA06g022186E	10.089	3.415	7.188	25.985	85.893	66.593	15.156	103.927	71.739	5.262	5.207	5.458	10.187	9.983	7.154	18.304	3.83	4.213	0.409844	2.7624	2.93967	/	K07192
BraA02g029735E	0.746	0.675	0.894	1.364	3.725	1.435	1.648	7.677	2.63	0.462	0.728	0.466	0.534	0.909	0.425	2.977	0.281	0.808	0.510025	1.85732	1.64646	/	/
BraA09g002258E	5.293	4.368	4.965	14.347	23.15	18.445	28.494	46.91	40.716	5.1	5.912	6.242	5.337	6.745	5.113	23.312	8.567	8.609	-0.207726	1.74142	1.59672	GO:0004672	K00924
BraA09g006385E	10.24	4.492	19.152	21.809	55.961	24.879	45.283	162.99	89.408	6.513	9.509	8.428	4.878	13.458	7.952	48.427	9.084	8.056	0.496192	2.01975	2.26558	/	K13464
BraA01g027693E	13.629	16.87	6.224	10.583	9.96	9.04	4.274	8.927	8.347	13.318	5.182	8.802	23.456	14.113	24.611	4.825	7.005	8.523	0.465433	-1.04782	0.167922	/	/
BraA03g012906E	14.797	11.649	12.909	23.442	24.656	25.981	28.168	33.839	34.765	11.607	11.422	12.469	11.567	13.65	11.967	26.089	15.631	13.082	0.180403	1.02231	0.89603	/	/
BraA09g004505E	23.636	26.3	28.713	16.048	5.356	3.922	6.438	5.055	14.354	22.73	23.9	25.886	23.391	23.815	26.415	14.52	27.784	24.507	0.147306	-1.55395	-1.30002	GO:0005576	/
BraA04g043377E	24.98	29.857	26.762	56.66	38.547	36.38	32.94	38.191	40.99	28.25	43.786	26.436	21.942	18.873	22.659	44.233	33.773	22.268	-0.242736	1.06462	0.237162	GO:0005515	K14515
BraA03g012256E	7.704	7.211	9.257	10.348	8.969	13.003	2.895	4.159	6.814	6.446	10.855	13.715	9.099	7.498	7.683	9.887	16.752	9.801	-0.330754	0.4358	-1.31712	GO:0003700	K13426
BraA06g018954E	5.108	0.535	17.153	13.722	27.405	36.1	83.857	34.06	45.359	2.387	3.848	3.878	2.438	3.688	1.31	35.838	7.213	7.028	1.19399	3.42036	1.7642	GO:0003677	/
BraA07g033290E	7.577	4.581	5.788	15.995	33.166	25.027	14.431	42.216	28.465	5.335	4.717	4.705	6.592	7.678	10.463	17.205	4.774	7.745	0.314479	1.63284	1.6008	/	/
BraA05g018686E	0.185	0.031	0.265	1.188	9.289	4.229	5.198	16.807	6.69	0.031	0.151	0.047	0.139	0.348	0.154	4.489	0.015	0.122	1.09224	4.59185	2.71219	GO:0005216	/
BraA01g025171E	26.683	11.381	15.628	44.753	34.416	42.232	85.351	54.352	71.293	13.047	11.851	17.812	16.444	16.954	27.848	63.388	26.851	30.565	0.364218	1.00915	0.872063	/	/
BraA07g037412E	0.47	0.282	0.095	0.571	4.313	2.243	2.718	7.803	3.187	0	0.184	0.095	0.189	0.193	0.657	2.16	0.651	0.186	1.63061	2.85019	2.2808	GO:0005509	K13448
BraA01g028339E	2.02	1.766	2.371	6.094	7.631	6.742	6.087	10.301	12.271	2.5	2.345	2.407	2.184	2.053	2.094	7.478	3.914	2.864	-0.205857	1.72462	1.08178	GO:0043531	/
BraA03g010623E	4.755	2.778	5.596	12.082	16.074	13.17	21.704	19.655	25.206	2.149	4.068	3.949	3.795	7.76	6.043	37.047	8.568	7.62	0.396629	1.26772	0.387544	GO:0003700	K09286
BraA10g047356E	3.196	2.857	3.564	6.119	11.158	10.292	10.112	19.595	12.54	3.243	5.036	3.699	4.784	4.891	4.123	11.147	5.687	3.753	-0.288705	1.04018	1.11988	/	/
BraA09g006334E	4.713	1.958	3.098	11.913	33.284	16.228	16.111	28.385	26.041	2.239	3.16	2.096	3.282	3.97	4.023	21.291	5.33	5.178	0.412746	2.50105	1.22314	/	K09422
BraA08g041198E	2.245	1.472	1.56	1.096	0.473	0.481	0.879	0.731	0.246	1.938	2.495	2.813	2.793	2.301	1.699	0.773	1.76	1.609	-0.425841	-1.72034	-1.07065	/	/
BraA01g027703E	33.942	38.345	38.028	60.385	102.691	74.376	24.307	82.763	73.6	38.194	40.6	42.944	34.58	30.541	26.676	34.481	49.389	36.325	-0.111747	1.41106	0.676546	GO:0004672	/
BraA02g030503E	0.9	0.623	4.325	1.19	10.582	1.579	4.501	5.815	5.35	0.555	1.488	1.258	2.776	0.71	1.036	1.244	1.095	2.193	0.844975	1.6359	1.87019	GO:0005515	K00799
BraA05g018425E	8.625	1.144	19.682	9.877	13.01	15.607	63.955	10.704	15.887	5.868	6.609	5.53	5.396	4.834	2.471	20.549	15.355	7.969	0.734193	1.63151	1.10639	/	K09422
BraA01g025446E	0.355	0.213	0.525	0.192	0.338	0.172	0.684	0.398	0.326	0.616	0.532	0.454	0.593	0.728	0.685	0.449	0.492	0.328	-0.522664	-1.48226	0.227296	GO:0005515	K17275
BraA06g019492E	4.644	3.527	4.158	7.477	11.739	7.665	9.67	19.272	13.971	4.348	3.401	2.517	3.361	4.846	5.231	12.791	3.528	4.68	0.295834	1.04011	1.1102	/	K20858
BraA01g024006E	18.548	13.538	33.707	24.27	37.482	19.167	22.12	44.987	29.082	16.694	22.233	13.461	12.65	11.069	15.942	27.842	12.259	19.854	0.354427	1.06781	0.766283	GO:0008168	/
BraA05g014381E	21.214	20.499	21.007	46.461	104.555	76.797	66.71	146.546	114.812	25.162	23.661	21.043	25.457	26.768	35.401	66.477	20.701	26.538	-0.124668	1.42902	1.6078	/	/
BraA01g025593E	5.493	4.01	9.198	12.384	17.922	19.003	11.487	17.688	19.956	5.871	9.715	9.289	4.835	6.541	7.329	9.929	7.851	7.125	-0.385165	1.43675	1.05808	/	/
BraA03g008828E	127.147	116.226	109.422	41.891	50.34	54.812	44.819	44.294	55.311	133.971	149.866	116.053	122.341	113.065	114.62	58.126	137.204	59.817	-0.14994	-1.21973	-0.740857	/	/
BraA03g011295E	0.203	0.527	0.204	0.164	2.396	0.21	1.088	1.235	0.859	0.569	0.515	0.45	0.732	0.457	0.566	0.243	0.281	0.441	-0.682782	0.742576	1.80339	GO:0006855	K03327
BraA06g020339E	4.65	3.618	5.639	9.664	8.422	14.815	10.127	17.898	23.149	2.931	3.532	4.693	2.589	1.676	0.859	4.04	6.81	3.92	0.34808	2.70509	1.8731	/	/
BraA02g032457E	10.128	10.455	18.049	6.487	5.344	2.969	2.872	9.657	9.865	8.767	13.911	9.04	12.495	15.917	13.521	10.795	20.342	19.405	0.310218	-1.48523	-1.0867	/	K01728
BraA05g015761E	2.645	1.568	3.899	4.854	2.595	5.28	3.234	1.028	3.889	3.826	3.493	3.411	1.964	2.459	1.905	2.983	5.181	3.636	-0.374452	1.02259	-0.467613	/	/
BraA07g036757E	0.498	0.374	1.255	2.707	6.723	4.711	7.065	14.313	5.997	0.374	0.243	0.628	0.187	0.638	0.497	5.47	0.615	0.739	0.80143	3.47268	2.08486	/	/
BraA07g035689E	18.007	13.422	12.856	38.706	35.66	37.953	39.494	76.349	59.79	13.686	11.675	13.998	10.463	21.292	20.171	52.717	14.907	21.013	0.203293	1.14007	1.0647	/	/
BraA01g027640E	1.633	1.498	3.976	3.303	4.298	3.103	4.353	8.144	6.842	1.09	1.662	2.198	1.5	2.371	1.493	2.378	2.018	3.165	0.548101	1.02924	1.43847	/	/
BraA05g018137E	0.574	0.096	0.386	3.724	11.549	8.13	9.376	15.013	11.138	0.239	0.234	0.048	0.479	1.813	1.527	12.988	0.52	1.041	1.04657	2.67488	1.3572	GO:0003700	K09286
BraA09g001797E	4.318	3.056	5.27	4.33	2.754	3.675	4.382	1.511	4.087	1.617	3.566	4.499	1.478	1.871	0.875	3.189	5.344	1.945	0.413012	1.36295	-0.00311919	GO:0006855	K03327
BraA04g042878E	1.795	0.718	0.746	0.681	0.572	0.326	0.857	0.353	0.713	0.741	0.899	0.77	1.394	1.679	1.32	0.918	1.642	0.777	0.469152	-1.45719	-0.723775	GO:0043531	/
BraA02g031977E	13.749	13.005	18.357	25.885	28.438	33.226	17.752	36.357	33.16	16.589	17.86	17.321	12.829	14.403	14.349	21.488	20.624	15.283	-0.16946	1.10472	0.687704	/	/
BraA01g025825E	3.74	0.847	29.13	2.886	6.096	8.793	5.137	1.322	3.25	2.976	6.613	4.807	1.46	1.19	0.864	2.122	1.323	1.188	1.24463	2.38268	1.12894	GO:0005524	K01006
BraA05g015226E	3.063	2.471	0.597	1.299	0.906	0.888	0.374	1.314	0.697	4.452	2.541	2.327	6.701	6.885	9.921	1.315	6.349	4.042	-0.565633	-2.90614	-2.19647	/	/
BraA02g032885E	6.772	6.167	7.435	16.108	9.774	13.273	11.958	12.988	19.711	6.042	5.936	6.396	5.003	5.427	7.187	14.431	8.582	7.604	0.179845	1.16682	0.615376	/	/
BraA01g024840E	33.257	20.812	14.71	13.973	10.447	9.566	0.655	21.684	12.663	40.093	26.28	22.817	64.453	85.112	79.191	11.553	66.808	39.674	-0.339033	-2.73277	-1.64725	GO:0016020	K14709
BraA04g042714E	6.48	4.816	9.139	11.699	3.866	17.27	1.623	1.263	5.976	8.342	4.43	16.628	4.175	3.604	2.77	2.218	5.582	4.214	-0.492554	1.64748	-0.372348	GO:0006662	K03671
BraA06g023193E	7.687	8.63	2.495	3.281	5.221	3.629	1.145	9.593	4.52	5.73	3.67	4.396	12.839	10.502	17.206	3.922	7.429	7.945	0.48417	-1.70398	-0.23642	GO:0006950	/
BraA09g000288E	9.544	9.099	10.037	11.313	22.524	16.589	20.37	41.769	30.272	9.735	10.811	11.896	8.275	8.522	8.593	16.426	9.256	7.312	-0.147293	1.03522	1.56854	/	K15559
BraA02g028727E	95.881	72.775	242.735	170.844	270.29	424.211	168.341	185.456	219.663	141.076	205.775	206.464	106.489	119.393	76.853	118.145	200.616	171.093	-0.403105	1.55454	0.307465	GO:0006520	K00261
BraA01g027675E	2.006	1.88	2.196	2.938	3.185	2.177	17.872	9.499	6.335	1.976	1.635	1.817	1.899	2.508	1.669	6.022	2.014	2.328	0.195324	0.476287	1.77054	GO:0004672	/
BraA09g001921E	6.794	5.279	6.303	11.502	17.287	13.985	14.376	23.95	20.903	5.347	5.339	5.9	4.877	4.274	5.2	16.656	6.997	5.597	0.179281	1.61303	1.09489	/	K05933
BraA09g000910E	3.844	3.605	4.071	5.565	13.862	8.783	6.94	24.257	14.564	2.362	4.053	3.505	2.67	3.76	2.81	8.307	3.023	3.328	0.244376	1.66146	1.72865	GO:0043531	/
BraA03g011888E	1.965	2.029	0.383	1.602	0.646	0.788	0.719	2.928	2.55	0.825	0.929	1.088	3.621	2.013	3.983	5.822	2.694	3.638	0.659385	-1.65777	-0.89008	GO:0005515	/
BraA02g030502E	3.104	1.337	2.432	6.016	10.19	14.523	2.891	16.519	9.993	2.676	3.537	2.828	1.901	1.723	1.935	2.927	4.049	2.005	-0.365318	2.50803	1.80669	/	/
BraA04g044324E	8.029	3.119	1.924	2.956	3.375	0.525	6.635	0.573	2.021	5.346	1.066	2.203	0.234	0.559	0.544	1.206	1.734	2.43	0.644267	2.38554	0.844266	GO:0016747	/
BraA01g027089E	3.757	2.843	5.677	9.836	5.348	8.686	4.919	8.948	18.402	7.619	5.833	3.062	3.379	2.763	3.266	4.76	10.14	6.815	-0.398721	1.35463	0.647229	GO:0003677	K10872
BraA01g024260E	1.033	0.767	2.719	1.819	26.784	8.22	8.388	22.597	12.344	0.4	1.204	1.379	1.236	1.263	0.698	4.724	3.195	1.649	0.622242	3.60513	2.26783	/	/
BraA03g010295E	30.134	22.02	67.425	34.819	24.409	25.339	36.365	44.762	49.946	15.533	43.788	29.344	9.605	15.812	7.857	21.892	20.794	28.693	0.453861	1.36018	0.955589	/	/
BraA08g038998E	5.604	4.14	3.742	4.645	10.157	7.294	6.588	10.089	7.621	4.11	3.5	4.143	3.788	3.205	3.867	5.562	3.124	3.966	0.231713	1.07173	1.02292	/	/
BraA05g014062E	73.945	52.629	186.377	92.86	139.933	263.006	90.655	54.895	77.038	112.068	181.719	127.584	67.998	59.856	59.195	49.989	155.879	83.959	-0.405715	1.44598	-0.303279	GO:0003885	/
BraA03g007869E	23.355	30.252	21.678	22.394	8.418	9.278	9.945	15.48	12.936	21.717	23.65	22.931	26.682	30.455	36.396	17.242	22.234	22.769	0.171646	-1.22688	-0.614088	/	/
BraA07g036863E	92.009	113.752	24.954	37.417	83.648	36.79	368.351	85.782	82.311	99.443	125.861	93.638	366.869	287.962	205.401	344.51	145.12	215.575	-0.43314	-2.4003	-0.331956	GO:0008152	/
BraA09g001574E	1663.07	2037.53	1217.15	1185.74	908.618	1847.79	550.896	761.962	495.067	1417.52	1466.55	1515.58	1228.72	1509.52	1482.56	1069.1	1599.56	1242.44	0.192954	-0.073482	-1.02576	/	/
BraA04g042410E	20.997	15.597	33.27	95.339	272.687	179.436	183.703	468.258	352.366	13.721	24.436	19.243	15.876	28.384	16.844	174.455	27.797	29.527	0.309424	3.21815	2.19141	/	/
BraA06g023651E	3.787	2.818	4.001	3.782	6.304	3.159	4.907	11.78	7.967	2.774	3.428	2.843	3.379	2.461	3.086	3.965	2.374	3.29	0.258953	0.607542	1.44263	GO:0016301	/
BraA02g030197E	5.701	4.082	8.584	12.862	16.261	12.625	10.709	25.574	24.96	6.549	10.022	6.843	5.954	8.239	6.164	12.879	10.914	12.707	-0.323797	1.06844	0.829555	/	/
BraA01g025053E	2.281	1.597	7.024	9.356	43.813	19.957	4.033	23.804	23.311	1.762	2.45	3.485	2.71	2.604	2.08	7.383	4.734	5.61	0.526599	3.37021	1.61308	GO:0005506	/
BraA09g001381E	97.661	134.484	112.369	76.966	46.791	33.453	22.656	56.724	63.595	98.985	123.03	89.233	132.706	134.857	133.115	64.942	77.926	89.981	0.175861	-1.34387	-0.620249	GO:0004553	/
BraA06g023106E	6.247	4.026	2.269	4.19	3.121	3.175	1.549	4.918	3.179	7.607	3.901	5.304	9.992	14.616	16.982	4.137	6.234	9.242	-0.38508	-1.96754	-0.930727	GO:0004345	K00036
BraA10g047794E	4.042	3.757	4.99	6.274	14.155	11.269	7.564	31.311	18.757	4.602	5.344	4.728	4.319	5.24	4.69	9.533	5.515	4.955	-0.169228	1.20215	1.61646	/	K08869
BraA09g001358E	90.493	86.82	182.9	79.294	128.183	143.663	19.545	115.725	107.218	97.338	107.05	100.672	54.673	58.694	47.597	52.302	119.321	100.09	0.266625	1.16531	-0.0719363	GO:0006812	/
BraA03g011168E	47.507	44.495	65.128	46.089	93.631	39.283	130.562	99.969	70.689	61.027	71.508	51.073	58.567	66.843	77.588	64.681	47.908	43.792	-0.196383	-0.133848	1.02292	GO:0006869	/
BraA01g025275E	13.587	15.291	3.091	3.157	8.148	4.429	49.904	11.157	8.466	9.764	6.367	7.353	31.569	19.254	27.1	22.149	11.805	16.697	0.482421	-2.25885	0.521653	GO:0016021	K15382
BraA09g001901E	3.422	1.179	2.035	1.361	1.257	0.64	2.315	1.531	3.503	1.348	1.808	1.812	3.655	4.024	2.854	1.344	2.163	1.888	0.449514	-1.67128	0.517335	GO:0008146	/
BraA10g046471E	5.419	7.278	7.03	2.702	0.907	1.693	1.608	0.468	1.414	5.574	5.365	6.292	4.687	3.803	4.516	3.409	5.576	5.509	0.225791	-1.29059	-1.98325	/	/
BraA03g008643E	1.339	1.546	1.142	11.458	86.901	12.386	2.338	67.483	51.14	0.825	0.402	1.456	2.788	0.317	2.569	3.394	2.444	1.733	0.62244	4.36522	4.08905	/	/
BraA02g030671E	2.153	1.128	4.441	6.582	15.509	6.747	5.817	35.783	19.477	1.642	2.203	1.759	1.592	3.624	2.198	12.639	2.077	2.08	0.487732	2.01099	1.94765	/	K13464
BraA01g027713E	0.377	0.29	1.021	0.264	2.125	0.721	4.841	1.49	1.196	0.29	0.566	2.046	1.887	3.769	0.838	0.492	0.544	0.573	-0.755064	-0.992754	2.29754	GO:0005506	/
BraA09g002121E	14.238	5.53	6.919	37.089	112.247	72.568	59.685	149.385	107.682	4.998	6.969	9.196	8.83	14.108	7.417	80.461	16.226	18.763	0.368103	2.92491	1.53413	GO:0005506	K09843
BraA01g027093E	13.028	2.258	1.17	1.63	0.329	0.334	4.657	0.609	0.751	6.845	0.693	1.692	0.646	22.931	2.573	1.03	2.678	0.255	0.881552	-3.53546	0.671224	/	/
BraA03g008191E	3.618	0.428	0.901	22.421	32.737	36.371	36.322	52.355	54.311	0.701	0.874	1.531	1.326	5.461	4.85	45.361	4.384	7.276	0.709121	3.0184	1.39345	/	/
BraA04g041536E	4.654	5.408	3.836	2.567	1.437	3.07	0.485	2.122	3.831	4.236	3.673	4.27	4.523	5.395	6.517	1.877	3.578	1.861	0.223232	-1.19831	-0.106306	GO:0003676	/
BraA04g044430E	26.494	16.643	25.009	62.853	70.396	90.322	61.979	135.001	152.896	23.602	22.972	35.736	20.07	20.199	19.712	93.345	67.068	62.341	-0.240762	1.92921	0.730352	GO:0004601	K00430
BraA08g040475E	0.228	0.457	1.611	0.462	2.91	1.539	0.943	4.917	4.232	0	0.669	0.346	0.343	0.234	0.228	0.684	0.226	0.113	1.19182	2.66983	3.3862	/	/
BraA09g006020E	6.957	3.962	11.44	11.074	20.727	14.93	16.885	20.603	23.259	6.843	5.905	5.482	8.272	6.5	9.158	18.281	5.214	6.607	0.322899	1.00989	1.08352	GO:0004672	/
BraA09g002117E	86.441	68.503	93.708	113.316	118.156	153.893	77.572	136.206	150.142	71.374	68.924	87.52	58.117	58.15	55.364	81.627	108.335	87.327	0.157073	1.19591	0.474288	GO:0005515	/
BraA08g039570E	17.682	3.026	1.451	7.5	4.953	4.068	0.26	5.292	3.049	19.434	8.089	15.917	42.693	51.066	34.873	6.399	23.209	26.904	-0.927772	-2.94983	-2.6115	GO:0005506	/
BraA07g034896E	66.401	20.155	61.034	76.506	245.473	167.785	31.615	47.51	57.113	37.502	38.06	43.002	50.997	39.541	35.139	23.747	44.785	24.991	0.346813	2.01705	0.624459	GO:0008168	/
BraA04g044459E	0.848	1.091	0.244	0.694	0.37	1.005	0.167	0.933	1.283	0.445	0.237	0.734	1.944	1.408	3.224	1.089	1.518	0.48	0.664282	-1.64739	-0.293301	GO:0003676	/
BraA08g040464E	15.806	3.364	80.51	11.437	4.516	76.427	14.287	0.995	3.948	7.591	16.93	24.651	2.665	1.66	1.22	4.608	28.165	2.057	1.03937	4.08815	-0.789455	/	/
BraA07g033996E	31.309	15.642	27.844	72.513	110.043	64.709	87.392	199.079	142.841	18.632	24.986	20.669	23.1	35.163	29.614	100.063	26.812	33.451	0.248256	1.53122	1.50055	GO:0004672	/
BraA04g041815E	2.693	3.318	0.865	0.829	0.596	1.092	1.006	0.369	0.537	3.321	3.316	2.796	4.85	5.038	6.305	1.519	6.558	5.329	-0.421643	-2.66394	-2.7317	/	/
BraA01g027169E	0.632	1.023	0.454	0.182	0.214	0.343	1.955	0.126	0.127	0.361	0.029	0.85	2.2	1.633	1.56	0.51	0.446	0.506	0.804554	-2.84282	0.656848	GO:0016020	/
BraA03g009165E	12.63	13.886	14.708	17.77	33.077	26.344	21.26	47.258	35.088	13.163	12.609	13.725	10.388	11.674	12.388	22.761	13.713	13.415	0.0923662	1.20881	1.13816	GO:0003774	K10357
BraA10g046512E	48.189	53.824	151.995	120.592	42.858	89.495	39.236	43.036	82.311	88.98	121.539	121.511	98.291	101.075	102.596	106.093	173.697	139.807	-0.362308	-0.255576	-1.27591	/	K09422
BraA09g000722E	8.705	9.398	4.01	6.761	3.893	6.821	1.697	1.95	2.359	10.362	7.309	10.498	8.51	9.027	8.787	3.285	5.037	5.515	-0.313628	-0.575892	-1.12492	/	/
BraA04g043557E	3.473	0.651	0.765	0.11	0.111	0.112	0	0.114	0	0.326	0	1.971	2.719	0.89	1.732	0	0	0	1.13311	-3.98436	/	/	/
BraA05g014388E	1.841	0.546	3.641	9.86	46.063	23.609	16.322	53.334	33.131	0.956	0.932	2.065	1.299	2.865	1.224	12.322	2.697	2.969	0.636886	3.94895	2.59691	/	/
BraA01g024160E	9.893	6.407	3.619	23.741	99.664	38.746	119.671	269.937	130.546	6.777	4.119	5.097	7.409	17.391	9.814	98.284	4.375	6.955	0.3537	2.29331	2.32311	GO:0003700	/
BraA02g033044E	19.597	14.823	17.431	48.132	51.223	57.315	78.152	100.545	93.94	16.462	22.78	20.499	16.813	21.009	17.017	67.561	26.788	30.411	-0.174377	1.54339	1.2028	GO:0008270	/
BraA03g010855E	0.702	0.059	2.534	0.651	0.358	3.456	1.267	0.368	0.743	0.176	0.571	0.945	0.235	0.12	0.058	0.292	0.231	0.232	0.983228	3.46305	1.72462	GO:0003677	/
BraA08g039261E	0.78	0.483	2.358	1.991	1.06	2.657	2.185	0.351	0.826	1.823	1.706	1.725	0.819	0.533	0.704	0.853	0.955	0.515	-0.511336	1.48795	0.59801	GO:0003676	/
BraA07g035795E	12.108	13.956	12.545	7.561	8.494	3.895	7.816	11.705	11.476	12.541	13.325	9.889	20.047	14.444	18.689	18.78	13.17	15.08	0.141052	-1.38846	-0.522235	GO:0005524	/
BraA04g043879E	5.446	5.128	2.152	3.347	2.883	2.49	0.826	2.186	3.956	3.314	3.911	2.963	8.828	8.096	5.964	3.518	4.433	5.495	0.353982	-1.37258	-0.872449	GO:0004725	K18045
BraA01g026071E	27.465	20.442	15.937	15.55	21.599	14.574	10.086	11.878	7.558	24.968	23.068	27.937	45.468	46.15	44.591	16.888	40.938	38.374	-0.217244	-1.36381	-1.61618	GO:0005576	/
BraA10g046722E	0.379	0.455	0.153	0	0.077	0.079	0.469	0.239	0	0.152	0.148	0.23	2.584	2.487	2.723	0.53	0.9	1.276	0.93407	-5.62451	-1.84598	/	/
BraA03g011024E	15.456	3.261	13.476	62.564	155.049	122.91	152.546	230.974	202.308	5.852	9.771	8.451	13.856	27.008	17.712	120.457	23.167	27.418	0.448277	2.59127	1.84831	GO:0003676	/
BraA04g042943E	0.539	0.249	0.418	1.804	8.116	4.215	4.538	8.407	4.919	0.083	0.446	0.209	0.291	0.723	0.455	2.817	0.328	0.616	0.732715	3.33188	2.32596	GO:0004842	/
BraA09g006033E	4.339	4.924	9.264	12.113	82.995	22.754	9.62	52.753	29.542	7.197	7.969	7.908	14.018	7.034	11.496	11.83	6.273	6.537	-0.289524	1.92961	1.99107	/	/
BraA04g044327E	1.72	0.224	1.883	3.023	0.99	1.007	3.625	5.101	4.51	1.572	0.292	0.302	1.648	1.609	2.311	2.388	1.256	1.332	0.857039	-0.153718	1.49041	GO:0042753	/
BraA03g010690E	3.629	0.774	0.487	0.049	0.444	0.201	0.2	0.152	0.307	0.533	0.473	1.953	6.982	4.809	3.909	4.733	0.478	8.522	0.766336	-4.46035	-4.31158	GO:0004568	K20547
BraA02g030914E	220.817	188.642	143.476	92.033	159.406	87.551	54.409	147.787	94.912	165.137	167.484	174.341	244.452	251.314	262.597	103.91	167.587	134.521	0.15805	-1.11971	-0.357573	GO:0010181	K05894
BraA07g033372E	13.548	11.216	9.912	26.112	79.101	50.112	57.024	135.869	103.098	11.513	10.188	10.408	13.272	15.356	12.194	70.614	12.019	11.027	0.143676	1.98322	1.73558	GO:0015031	K19476
BraA03g008430E	8.009	6.291	7.911	8.794	14.342	10.409	19.333	39.804	19.47	7.424	7.975	10.261	5.612	7.501	6.209	15.584	9.618	8.668	-0.177124	0.835729	1.3029	GO:0004672	K02218
BraA03g011851E	12.876	9.589	16.214	11.644	15.594	17.571	17.268	11.789	11.129	13.035	9.92	11.045	6.237	5.057	5.065	11.282	11.03	10.476	0.216802	1.48711	0.369968	/	/
BraA08g039463E	40.947	13.705	26.727	88.407	127.792	130.287	120.26	193.556	173.068	18.477	23.552	25.021	20.12	46.903	31.728	123.414	35.028	41.974	0.311368	1.85032	1.35536	GO:0003824	/
BraA06g019219E	0.616	0.237	1.336	0.192	0.048	0.147	0.244	0	0.1	0.616	0.509	0.287	1.471	1.359	0.945	0.142	1.217	0.891	0.658132	-3.27349	-2.63322	/	K19040
BraA01g028459E	0.932	0.632	2.614	2.725	5.694	8.034	3.192	4.994	5.106	1.233	2.827	1.947	1.134	0.954	1.029	1.661	2.927	1.119	-0.501851	2.44518	1.30246	GO:0003735	/
BraA10g047678E	2.539	1.848	3.566	4.124	0.706	9.092	3.096	0.646	1.629	1.772	5.712	3.495	0.386	0.631	0.537	1.69	5.325	1.523	-0.440884	3.17936	-0.598119	GO:0006662	/
BraA09g001470E	3.157	1.748	1.761	4.247	11.487	10.752	1.425	7.25	6.743	2.399	3.607	2.39	3.334	3.148	3.317	3.433	2.982	1.562	-0.301703	1.486	1.03582	GO:0005515	/
BraA09g001856E	2.942	2.486	4.803	9.59	17.827	16.508	134.585	19.115	26.252	2.742	4.657	5.784	5.337	4.885	2.125	56.154	10.679	10.54	-0.338324	1.87057	1.27011	GO:0006012	K18819
BraA01g024218E	2.819	2.82	1.325	0.76	2.106	1.753	4.458	2.367	0.398	3.763	3.67	2.465	3.39	7.124	6.184	2.063	1.3	2.045	-0.474731	-1.81103	0.497607	/	/
BraA09g004508E	7.564	8.214	16.242	5.836	1.876	3.455	3.337	0.888	4.003	9.815	18.322	12.303	19.399	22.128	15.781	4.967	19.675	8.519	-0.312443	-2.36251	-1.94302	GO:0003677	/
BraA01g025129E	0.655	1.123	1.696	2.364	1.667	1.648	0.868	2.356	2.524	0.515	1.051	0.991	0.469	0.767	0.466	0.56	0.416	1.249	0.467295	1.75717	1.45178	/	/
BraA09g005740E	2.316	3.012	0.56	2.529	7.22	4.033	4.062	5.494	3.677	2.041	0.995	1.122	0.836	1.566	1.848	2.312	1.648	0.871	0.540142	1.75403	1.53553	GO:0016491	/
BraA05g018671E	10.574	3.559	0.548	2.298	2.668	1.229	2.294	3.112	0.628	2.325	2.172	4.886	5.496	6.885	3.844	2.367	3.37	5.769	0.686569	-1.36316	-0.836064	GO:0016491	K08070
BraA04g043859E	2.77	1.422	4.198	7.658	17.255	21.823	5.007	16.725	13.828	2.184	5.363	3.636	2.235	2.436	1.785	6.509	3.586	3.08	-0.389999	2.90274	1.5159	GO:0005515	/
BraA04g043501E	0.761	1.171	0.766	2.662	13.171	4.972	6.699	34.328	15.108	0.351	0.571	1.004	0.821	1.259	1.517	6.19	1.041	1.158	0.517564	2.60136	2.83056	/	/
BraA03g012373E	10.329	12.986	4.406	6.727	11.422	5.931	93.639	11.037	5.515	8.944	7.725	5.869	22.986	15.922	14.894	17.463	23.454	14.778	0.333018	-1.12237	1.04957	GO:0005515	K15382
BraA10g044880E	3.323	1.571	6.025	5.131	6.647	17.531	15.455	6.849	6.777	2.843	5.605	6.645	1.392	2.414	1.205	6.573	13.794	6.635	-0.441476	2.58615	0.183076	GO:0008270	/
BraA07g033601E	5.676	6.968	7.191	18.258	13.053	14.795	21.38	20.672	24.028	4.649	8.483	12.063	7.411	8.899	5.146	20.602	11.39	10.977	-0.315915	1.1196	0.693962	/	/
BraA08g038689E	0.225	1.799	1.529	0	0.057	0.117	0	0.059	0.238	0.957	0.768	0.624	1.577	1.843	0.504	0	0.611	0.278	0.624456	-4.47412	-1.50859	GO:0033926	/
BraA05g015389E	3.957	5.038	4.421	3.346	5.423	3.579	16.179	7.476	4.34	5.186	6.113	4.646	9.877	7.887	8.036	7.325	7.396	6.905	-0.219771	-1.02819	0.448156	GO:0005515	K00799
BraA09g007047E	2.994	2.919	1.069	1.533	2.046	2.396	0.899	0.398	0.321	4.212	3.331	1.874	4.557	3.301	4.687	0.832	2.997	1.613	-0.396595	-1.03828	-1.66865	GO:0004499	K11816
BraA08g039342E	3.012	3.254	3.338	7.126	13.439	8.553	13.609	33.576	21.485	3.498	3.648	4.255	3.984	5.678	3.484	21.707	6.073	5.901	-0.216535	1.18994	1.10893	/	/
BraA03g012771E	8.18	4.877	3.547	7.011	25.551	9.826	26.21	24.395	16.57	8.298	6.666	5.849	8.686	11.656	8.59	13.141	5.355	7.129	-0.291054	0.611777	1.46685	/	/
BraA07g036373E	7.285	5.565	8.243	15.603	30.272	23.099	25.842	70.183	45.2	7.33	8.938	8.004	6.51	7.281	8.232	24.397	7.911	8.026	-0.173226	1.6928	1.89076	GO:0004672	/
BraA06g020389E	0.252	1.908	0.616	2.111	0.99	0.448	0.371	0.038	0.609	0.36	1.828	2.361	0.541	2.655	0.251	1.15	7.649	1.496	-0.684683	0.0344854	-3.27123	GO:0004096	K03781
BraA02g029204E	2.653	2.022	3.532	1.98	3.025	0.818	6.777	6.929	3.677	2.783	2.437	1.785	3.545	2.395	3.559	2.27	1.686	2.094	0.257885	-0.670529	1.60574	GO:0006855	K03327
BraA08g039885E	5.553	2.641	4.952	10.124	26.801	26.276	13.476	25.466	20.04	4.831	6.134	5.144	6.431	6.249	6.99	11.631	7.873	7.657	-0.263402	1.73558	1.20152	/	/
BraA08g039984E	0.33	0.314	0.38	0.984	0.928	1.058	0.534	1.236	1.13	0.267	0.169	0.364	0.267	0.338	0.438	0.439	0.543	0.606	0.388498	1.53412	0.953505	GO:0005515	/
BraA06g020859E	88.28	43.263	113.651	188.893	344.656	264.987	217.375	568.621	435.606	73.421	74.628	61.298	58.28	87.295	77.913	240.908	91.96	89.162	0.256825	1.88198	1.61448	GO:0004672	K20536
BraA01g026777E	0.239	0.431	1.783	0.484	6.822	1.834	1.48	3.615	2.683	0.431	0.514	0.628	1.438	0.882	0.477	1.05	0.851	0.379	0.664059	1.78416	1.85525	/	/
BraA01g027781E	0.841	0.788	0.741	3.453	19.27	9.258	13.606	35.576	16.962	0.737	1.591	0.901	2.106	1.238	1.729	8.182	1.766	1.352	-0.418857	2.72213	2.63275	/	/
BraA09g005595E	46.728	39.07	38.716	85.279	105.945	114.771	123.569	153.503	160.384	45.66	40.153	54.081	39.013	57.529	54.316	125.862	78.81	85.377	-0.135453	1.05526	0.669356	GO:0005509	K13448
BraA02g029920E	3.994	3.318	17.534	6.238	8.066	12.124	17.182	6.215	8.87	3.107	7.593	7.198	2.287	3.545	2.099	6.159	7.544	3.917	0.493597	1.77204	0.942163	GO:0009058	K00815
BraA03g009414E	2.431	1.892	2.518	1.639	1.651	1.82	1.324	1.985	3.002	1.555	1.781	6.407	4.4	4.083	3.839	1.551	4.74	4.077	-0.477595	-1.24576	-0.635947	GO:0003677	/
BraA03g009940E	0.267	0.374	0.269	0.594	1.252	0.886	0	0.897	1.131	0.107	0	0.377	0.054	0.11	0.053	0.053	0.106	0	0.950148	3.70614	3.75825	GO:0003824	K01115
BraA01g027269E	60.553	26.723	42.116	34.638	23.125	45.501	10.195	9.305	16.481	35.32	27.317	47.93	63.203	79.839	42.111	22.062	54.466	61.874	0.260712	-0.824693	-1.86685	/	/
BraA05g015769E	5.27	5.435	1.934	3.882	5.035	4.276	12.136	3.816	5.361	6.585	4.787	4.823	10.439	8.957	8.922	6.932	7.268	7.64	-0.3219	-1.07171	0.0338836	GO:0016021	/
BraA07g036110E	3.689	6.536	2.517	3.264	2.31	1.792	1.427	0.847	1.18	3.232	4.279	2.986	1.078	2.559	2.185	2.033	3.419	3.575	0.310621	0.356187	-1.30932	/	/
BraA01g026850E	3.988	2.593	2.545	11.761	13.679	7.096	19.132	31.12	20.613	2.329	3.051	2.281	2.331	3.814	3.182	20.304	3.679	6.841	0.283282	1.83208	1.27814	GO:0005515	/
BraA06g020743E	55.588	31.527	55.878	49.706	28.086	43.368	41.824	31.246	43.469	35.584	49.167	42.103	39.733	36.248	36.985	65.719	119.58	74.763	0.201974	0.1122	-1.08173	GO:0003677	/
BraA07g034435E	5.838	5.006	4.157	6.968	13.594	14.786	15.985	18.984	12.498	5.01	4.973	7.929	5.103	6.792	4.772	11.568	7.029	5.082	-0.222663	1.12886	1.0833	GO:0016491	K04125
BraA02g029778E	29.56	39.122	1.954	14.143	8.269	11.8	0.527	15.916	6.16	12.216	3.989	22.566	33.818	34.576	44.245	8.052	24.929	20.46	0.906264	-1.70485	-1.1303	GO:0030410	K05953
BraA07g035193E	2.914	4.924	8.155	0.786	1.385	0.94	3.942	2.175	2.193	6.484	1.138	4.117	5.581	3.052	3.165	6.077	2.561	2.499	0.478794	-1.89079	-0.35264	/	/
BraA02g032747E	0.508	0.808	2.621	1.572	3.229	1.674	1.265	2.668	2.279	0.898	1.139	0.815	0.929	1.042	0.805	1.702	1.153	1.657	0.487441	1.26582	0.543901	/	K10664
BraA06g023501E	1.256	0.559	1.406	4.092	14.787	7.233	9.791	20.365	11.67	0.559	0.409	1.127	0.839	1.716	1.81	7.802	0.414	2.21	0.654366	2.64204	2.08299	/	/
BraA09g005323E	0.317	0.317	0.297	0.435	0.761	0.728	0.28	1.522	1.414	0.272	0.288	0.137	0.227	0.186	0.09	0.497	0.313	0.224	0.446821	1.973	1.71949	GO:0005515	/
BraA03g011794E	37.512	43.002	78.175	67.55	79.707	88.518	174.635	123.535	125.834	36.59	64.701	31.762	25.733	33.156	16.618	138.692	212.366	50.421	0.278389	1.67288	0.155621	/	/
BraA04g042553E	5.703	3.528	5.526	7.306	6.164	7.625	5.254	5.301	7.787	3.792	3.401	5.579	2.748	3.301	3.43	7.561	15.921	8.012	0.240358	1.17728	-0.702156	GO:0005506	K10717
BraA06g020482E	3.999	2.08	23.61	18.923	5.704	16.414	25.744	11.754	24.296	10.891	23.513	16.708	4.489	3.606	2.553	25.87	36.21	9.973	-0.765461	1.94451	-0.1533	/	/
BraA03g008307E	2.194	1.882	4.232	2.282	0.83	2.924	1.488	1.119	2.057	3.515	2.878	4.113	2.073	2.248	1.876	3.567	4.586	3.909	-0.309591	-0.0272095	-1.29731	/	/
BraA09g004807E	1.124	0.463	0.933	1.27	4.648	7.333	0.341	0.972	1.12	1.787	0.904	0.867	0.928	0.881	0.659	0.462	1.503	0.785	-0.464498	2.47678	-0.093094	/	/
BraA06g022111E	1.897	1.384	1.553	4.754	7.89	4.136	4.973	26.298	17.565	1.306	1.235	1.595	1.703	1.943	2.128	11.124	1.289	2.268	0.257248	1.57902	1.81503	GO:0003677	/
BraA02g029316E	11.536	9.166	3.109	5.328	3.53	3.051	2.645	3.139	3.517	6.464	4.034	8.432	14.415	15.37	10.984	2.512	4.082	4.932	0.369006	-1.76292	-0.22916	GO:0005618	K01051
BraA03g007413E	0.34	0.062	0	1.971	5.675	3.721	10.727	9.194	4.848	0.062	0.03	0.094	0.186	0.317	0.185	8.125	0.336	0.521	1.15885	4.10072	1.52973	GO:0003700	K09286
BraA03g010649E	0.868	0.046	0.138	0.416	0.838	0.521	0.236	0.144	0.435	1.326	0.402	0.23	0.092	0.094	0.456	0.137	7.405	2.893	-0.853958	1.51537	-3.60178	/	/
BraA09g004276E	9.962	6.615	7.008	14.24	30.357	27.147	28.527	52.195	37.72	9.028	9.31	9.186	7.143	8.975	8.136	24.775	10.017	13.257	-0.190803	1.61164	1.38273	/	/
BraA07g037448E	16.32	4.665	9.602	6.794	8.173	16.133	3.678	2.519	6.096	8.376	15.001	16.4	8.177	11.593	4.65	7.119	18.775	11.874	-0.347528	0.381616	-1.54628	/	/
BraA04g042815E	40.911	46.379	46.035	34.268	45.035	30.389	25.394	34.406	35.703	46.843	41.799	39.247	107.172	81.22	84.331	55.726	59.331	62.605	0.0909344	-1.28216	-0.81512	GO:0008152	/
BraA04g042604E	16.331	15.743	53.32	29.645	21.628	17.464	12.788	46.285	31.819	12.56	35.596	17.379	5.207	9.659	9.328	21.341	17.903	16.454	0.401809	1.52327	0.796045	GO:0030145	/
BraA07g036260E	361.771	332.638	124.333	196.523	291.165	207.536	174.724	273.034	193.803	298.445	328.832	383.276	615.548	517.897	484.037	646.877	685.334	663.588	-0.268794	-1.18226	-1.55156	GO:0000234	K05929
BraA07g037230E	1.051	1.451	2.952	1.945	8.851	3.574	4	15.459	7.284	1.186	1.691	1.613	1.231	1.486	1.092	4.181	1.946	1.889	0.305746	1.98012	1.82961	GO:0004672	/
BraA03g010348E	26.321	26.541	126.341	44.776	64.339	31.394	70.685	105.255	77.162	31.791	50.801	40.405	45.01	42.165	37.639	32.183	35.378	51.127	0.563991	0.205099	1.17841	GO:0008061	/
BraA08g039220E	41.452	30.763	79.537	65.496	32.603	66.141	46.342	34.607	54.686	38.317	42.743	48.835	24.441	26.075	24.323	39.454	58.696	57.043	0.251458	1.14486	-0.119809	/	/
BraA06g022939E	25.193	24.811	46.452	103.632	73.601	133.189	9.763	72.003	142.364	29.274	37.288	47.816	39.374	51.925	22.325	30.36	59.448	63.258	-0.218469	1.46798	0.628762	GO:0004657	K00318
BraA05g017915E	35.175	6.051	2.646	24.46	5.999	9.568	0.246	8.855	9.181	39.918	12.125	26.261	71.218	119.454	53.413	10.566	23.913	22.915	-0.791298	-2.62603	-1.55876	/	K06892
BraA03g007477E	5.238	1.616	2.815	2.163	1.556	7.872	7.025	0.55	0.739	2.229	4.391	6.256	0.7	0.805	1.001	2.484	3.409	1.296	-0.380892	2.24215	0.272609	GO:0008146	/
BraA07g035997E	2.531	1.756	2.385	7.182	25.576	8.758	47.293	94.102	43.638	1.757	1.993	2.101	1.759	5.187	1.588	23.961	1.775	1.939	0.219945	2.3435	2.81807	GO:0003700	/
BraA09g006189E	2.4	1.359	1.734	16.85	68.325	30.227	66.293	168.758	86.37	1.768	1.592	1.28	3.177	3.573	2.665	52.847	3.447	3.764	0.275266	3.67791	2.49748	/	/
BraA07g036417E	6.611	5.805	6.448	12.48	22.426	14.725	21.295	49.687	32.269	6.056	5.598	6.069	5.322	6.161	5.962	18.184	5.527	5.324	0.121449	1.55123	1.91149	/	/
BraA09g005136E	0.312	0.402	0.315	1.714	1.772	3.052	1.381	2.014	2.314	0.045	0.218	0.405	0.089	0.137	0.222	1.959	0.75	0.574	0.654255	3.89396	0.871115	GO:0003676	/
BraA06g020168E	27.242	18.476	26.307	51.299	90.833	54.182	154.591	178.629	138.622	19.878	26.255	19.622	20.822	40.738	23.638	108.775	21.958	29.19	0.160779	1.247	1.63306	GO:0005509	K13448
BraA02g032916E	2.652	3.722	2.597	2.011	3.377	3.359	7.296	4.872	7.29	3.135	3.13	4.275	5.611	4.189	3.526	2.794	2.439	3.973	-0.200336	-0.571031	1.15238	GO:0016747	K19747
BraA07g035349E	12.982	13.172	18.965	19.145	22.23	13.34	12.705	36.144	32.764	10.368	15.821	14.556	5.671	8.867	4.463	16.872	15.354	9.589	0.174647	1.55368	1.04899	GO:0005515	/
BraA01g023862E	62.69	68.577	62.535	25.012	31.47	17.451	33.003	49.252	38.007	34.3	73.432	64.537	36.636	88.55	46.696	60.187	50.091	41.398	0.198297	-1.18519	-0.252343	GO:0005506	K11812
BraA01g026778E	137.931	106.247	37.655	39.449	84.744	107.382	27.743	36.364	15.245	108.707	94.332	152.302	242.283	187.652	215.881	59.789	100.474	74.693	-0.297579	-1.43314	-1.47472	/	/
BraA04g043961E	3.579	4.633	3.393	3.991	2.574	2.564	6.407	5.028	4.902	4.321	4.266	4.833	7.595	6.525	6.929	10.771	8.376	7.604	-0.177885	-1.19026	-0.635564	/	/
BraA02g028544E	20.764	11.624	6.464	11.339	12.815	10.943	6.15	6.841	4.491	9.307	9.325	13.867	18.733	13.096	12.545	11.902	15.031	16.747	0.293715	-0.311764	-1.23699	GO:0005576	/
BraA05g014502E	8.567	7.725	18.966	15.428	10.226	13.528	20.445	12.042	17.201	5.117	12.425	11.391	5.932	7.648	3.117	13.177	23.515	18.592	0.309062	1.24341	-0.0790739	/	/
BraA01g027863E	2.879	4.001	2.095	5.58	7.415	6.466	5.941	4.87	6.01	2.002	0.781	4.036	2.004	2.131	4.228	7.825	3.162	3.245	0.433345	1.25437	0.311282	GO:0009733	K14488
BraA01g024188E	5.629	1.604	2.082	1.477	2.286	0.775	15.656	3.291	1.131	1.855	1.148	4.098	5.641	7.556	3.873	2.525	3.944	3.384	0.429502	-1.87702	1.09823	GO:0008152	/
BraA03g012733E	11.307	7.794	1.55	7.15	19.028	8.158	2.102	10.38	5.603	16.381	9.346	5.967	44.705	44.765	43.632	8.136	40.421	26.153	-0.57866	-1.90143	-1.94349	GO:0016021	K01535
BraA03g010475E	3.894	3.069	7.31	5.607	15.746	14.614	9.372	20.746	14.299	4.725	8.355	4.703	4.966	4.473	4.883	10.483	6.473	6.188	-0.292793	1.38019	1.02525	/	/
BraA07g034895E	8.088	4.27	7.333	6.133	73.556	18.487	21.553	16.272	16.977	6.073	6.231	11.698	10.446	5.524	3.719	9.105	9.726	7.647	-0.253699	2.39404	1.12575	GO:0008168	/
BraA02g031778E	1.611	3.055	2.941	1.153	1.709	1.774	3.531	0.74	1.278	3.124	4.719	1.727	4.573	5.054	3.514	4.287	2.322	4.814	-0.305599	-1.47054	-0.977263	GO:0016491	/
BraA06g020771E	1.558	2.066	0.716	7.6	16.73	9.16	16.453	34.691	21.18	0.983	2.017	2.734	4.106	3.851	2.229	14.129	3.849	3.049	-0.369258	1.76239	1.86236	GO:0005515	/
BraA10g047265E	3.116	3.385	17.76	9.452	21.406	14.303	21.768	21.776	26.385	5.527	5.13	7.368	8.655	5.656	3.907	9.777	14.257	14.097	0.451923	1.35383	0.953122	GO:0003700	/
BraA01g025256E	203.393	256.579	445.906	169.024	36.466	33.864	36.142	52.606	93.949	172.756	381.067	219.741	156.124	215.887	200.676	140.234	212.601	209.891	0.251413	-1.28657	-1.54708	/	K01728
BraA02g029075E	5.254	1.19	1.099	11.827	38.577	24.042	161.885	117.17	62.321	3.474	2.324	5.002	3.378	12.087	4.053	82.728	10.289	7.259	-0.478389	1.98918	1.83414	/	/
BraA06g019441E	3.356	3.493	3.278	3.667	4.04	1.722	1.993	3.736	2.87	2.138	3.609	3.318	1.461	1.389	0.811	3.553	2.781	3.354	0.189046	1.38817	-0.0887163	GO:0016020	K08145
BraA09g002531E	3.192	2.801	4.56	4.338	9.835	5.477	5.344	9.228	5.677	2.436	3.705	3.247	2.15	3.27	2.453	5.876	2.612	2.201	0.196003	1.36869	1.00364	GO:0004672	/
BraA07g037465E	14.651	14.657	21.88	10.942	4.05	4.807	2.051	2.164	5.61	13.342	19.342	13.374	12.543	11.994	11.748	6.761	19.722	13.259	0.179374	-0.877942	-1.94268	/	/
BraA07g036799E	0.173	0.087	1.048	0.964	3.356	4.403	1.073	3.823	2.294	0.608	0.847	0.7	0.782	0.444	0.605	1.991	1.8	1.373	-0.698717	2.30203	0.566938	/	/
BraA03g012298E	0.092	0.092	0.37	0.093	0	0	0.474	0.386	0.195	0.276	0.179	0.556	1.197	1.695	0.916	1.376	0.908	1.273	-0.839642	-5.21356	-1.6735	/	/
BraA03g012189E	0.106	0.053	0.08	0.242	1.462	0.496	0.521	5.997	1.94	0.08	0.078	0.241	0.027	0.191	0.106	0.557	0.079	0.079	-0.699888	2.84035	3.66102	GO:0004672	/
BraA07g035208E	10.821	3.093	14.141	20.256	24.945	25.571	47.715	36.738	28.665	9.844	12.501	13.479	9.109	9.313	10.669	26.048	21.331	17.744	-0.324643	1.31517	0.873648	/	/
BraA07g036904E	3.778	4.707	14.795	8.433	114.091	18.545	26.328	49.09	29.049	5.068	6.893	6.619	16.36	7.012	7.11	11.813	13.952	10.017	0.34875	2.29087	1.63473	GO:0005515	K00799
BraA03g010824E	0.142	0.061	0.836	0.777	0.35	1.007	0.23	0.191	0.921	0.263	0.87	0.49	0	0.104	0	0.182	0.52	0.32	-0.627993	4.38945	0.458691	GO:0004672	/
BraA02g028512E	18.491	20.106	1.377	5.934	6.961	11.499	4.893	5.823	7.998	12.637	24.183	28.314	48.823	34.596	18.28	39.805	66.434	50.277	-0.668947	-2.03165	-2.98583	/	/
BraA10g046572E	39.721	14.43	10.845	8.793	67.908	27.537	11.434	12.024	10.384	41.415	31.076	13.005	58.832	46.62	46.911	17.893	37.847	22.092	-0.358541	-0.475458	-1.11785	/	/
BraA09g006618E	0.505	0.505	1.126	0.729	0.514	0.448	0.372	0.719	0.343	0.614	0.458	0.619	2.782	0.739	8.881	0.756	0.962	0.464	0.366731	-2.85138	-0.517323	/	/
BraA02g032775E	1.597	1.191	2.682	5.224	32.446	16.034	11.146	56.938	31.82	1.568	4.343	1.264	2.982	1.957	1.718	9.973	5.665	2.975	-0.369573	3.07841	2.51484	GO:0005516	/
BraA07g035183E	4.32	0.534	0.049	0.147	1.335	0.302	0	1.579	0.411	3.596	0.995	3.82	4.475	9.995	4.695	0.436	0.48	1.969	-0.732818	-3.35555	-0.422213	GO:0006508	K01365
BraA05g015724E	3.764	2.675	5.488	6.159	4.188	4.825	7.459	3.067	7.391	3.025	3.096	4.248	2.779	1.573	1.136	5.043	8.861	4.95	0.23153	1.47816	-0.0042964	/	/
BraA10g045869E	17.565	19.463	5.056	18.604	11.892	11.458	20.821	29.431	40.836	20.79	14.881	17.101	48.725	35.844	47.256	40.657	28.613	27.384	-0.289896	-1.64058	-0.0113579	/	K16302
BraA04g042520E	2.043	3.734	1.148	1.271	1.081	1.996	1.176	0.907	0.665	3.383	3.147	2.221	2.875	2.295	2.273	1.883	2.913	2.488	-0.304421	-0.75251	-1.32465	/	/
BraA07g034887E	0.303	0.101	0.509	1.072	2.417	1.256	0.521	2.437	1.977	0.202	0.247	0.153	0.405	0.414	0.302	0.756	0.1	0.15	0.626616	2.12727	2.37541	/	K20725
BraA07g037307E	3.798	3.477	2.464	4.295	2.623	3.536	0.93	1.554	1.499	5.606	2.326	4.092	6.902	6.99	10.463	2.056	2.927	3.567	-0.267802	-1.20332	-1.02076	GO:0009733	K14488
BraA09g001560E	8.601	7.696	14.316	16.816	10.667	15.614	4.942	4.879	9.97	10.858	10.313	14.124	5.175	7.608	6.375	8.852	13.606	11.277	-0.176487	1.18539	-0.696626	/	/
BraA03g012316E	14.696	11.036	22.266	17.081	12.024	33.06	9.788	7.45	13.349	14.713	18.685	22.498	8.852	12.212	6.886	11.166	22.761	16.221	-0.191715	1.17705	-0.638561	GO:0000062	/
BraA01g026642E	18.957	7.021	15.046	53.217	78.382	99.038	44.719	64.415	78.671	10.54	18.932	20.685	7.891	12.277	7.767	47.331	30.878	24.941	-0.26004	3.08416	0.939533	GO:0005215	/
BraA09g006633E	4.966	2.974	6.913	5.346	26.964	10.01	6.615	21.137	11.668	5.825	6.592	5.011	4.928	4.248	4.215	6.016	7.259	5.598	-0.202635	1.72703	1.1567	GO:0000287	K01530
BraA09g000063E	21.095	9.736	15.697	27.92	53.431	37.416	19.536	70.304	45.413	10.704	16.154	14.321	17.008	23.971	16.926	36.755	12.226	11.718	0.206609	1.08068	1.2402	GO:0003700	K13425
BraA10g048020E	14.739	8.313	15.083	19.597	8.528	31.711	14.58	4.924	10.159	8.988	10.421	14.764	5.588	7.161	5.173	9.163	18.591	8.499	0.188752	1.75459	-0.219889	GO:0005089	/
BraA07g033362E	3.609	2.317	11.624	4.234	3.358	6.279	0.506	1.216	1.462	2.186	5.83	5.485	0.58	1.689	1.422	1.468	1.761	1.234	0.399804	1.93768	-0.408415	GO:0005506	K00469
BraA03g010493E	0.794	0.199	2.267	0.937	3.439	2.058	1.297	2.501	1.892	0.928	0.84	0.468	0.464	1.356	0.792	0.33	0.458	0.72	0.568047	1.35923	2.00024	/	/
BraA09g005587E	11.995	7.54	9.411	37.349	77.572	57.063	99.834	193.328	118.566	8.325	8.363	10.034	7.518	29.076	11.645	88.446	10.877	12.99	0.147435	1.88202	1.94997	GO:0004672	K13436
BraA04g044653E	7.039	4.712	2.245	5.12	3.921	11.39	14.262	11.057	7.557	3.752	3.116	4.906	2.03	3.58	4.495	3.741	3.304	2.405	0.285946	1.04659	1.87739	GO:0003677	/
BraA02g030329E	68.908	72.37	91.287	66.876	35.742	22.088	20.601	23.075	28.529	39.316	104.763	59.462	30.652	53.377	32.747	48.655	65.46	48.113	0.217645	0.0946641	-1.0897	/	K01728
BraA09g004373E	5.798	1.873	6.059	10.741	31.88	24.783	17.535	28.124	12.882	3.894	4.045	3.634	4.331	9.741	4.202	10.748	6.514	5.452	0.276339	1.9375	1.45225	GO:0005515	/
BraA07g036550E	10.086	8.909	11.098	22.022	30.46	28.135	37.155	38.708	35.166	12.068	10.235	10.72	9.893	13.449	12.449	29.419	13.151	16.492	-0.102904	1.20821	0.985573	GO:0003830	K00737
BraA07g034905E	8.347	5.398	11.336	7.926	4.745	13.001	9.8	2.227	6.443	6.326	6.981	8.982	3.512	4.489	4.047	4.788	9.937	6.526	0.19946	1.11243	-0.135328	/	/
BraA09g000820E	0.591	0.535	0.765	0.569	0.258	0.525	0.435	0.561	0.745	0.563	0.55	0.483	1.269	0.663	1.179	2.051	1.419	1.281	0.274425	-1.19109	-1.37393	/	/
BraA03g010601E	0.934	1.105	0.599	0.429	0.087	0.352	0.088	0.535	0.36	1.021	0.664	0.257	1.532	1.393	1.525	0.424	0.924	1.429	0.475187	-2.34738	-1.41041	/	/
BraA03g008841E	23.695	12.547	27.695	67.551	186.924	126.443	129.526	245.734	202.56	15.374	21.188	20.491	18.004	22.159	17.342	106.522	38.231	28.377	0.192897	2.78119	1.81594	GO:0003700	K13424
BraA09g001871E	2.401	2.863	3.503	3.807	3.151	4.4	2.319	3.246	3.863	2.327	2.626	3.121	1.502	1.634	1.59	2.665	3.171	2.3	0.148159	1.28804	0.291151	GO:0004672	/
BraA04g042053E	13.676	5.237	10.679	16.209	26.531	33.095	15.391	16.141	18.56	10.155	10.481	14.99	10.426	14.884	13.052	15.219	10.155	12.302	-0.235526	1.02491	0.486366	/	/
BraA06g022713E	4.089	3.636	4.526	9.008	34.172	12.504	8.566	45.067	33.846	3.336	5.719	4.941	6.121	3.155	2.719	12.27	6.312	3.197	-0.163822	2.27278	2.09118	GO:0003700	/
BraA09g004755E	1.772	1.642	0.661	0.199	0.602	1.225	0.474	0.551	0.556	1.643	2.116	1.457	2.697	1.816	3.077	1.507	1.038	1.169	-0.323538	-1.86385	-1.15554	GO:0005576	/
BraA10g047535E	17.824	9.609	11.462	20.15	51.463	30.851	37.516	51.088	37.62	14.605	13.971	15.836	22.212	21.446	20.977	26.714	17.237	13.215	-0.158286	0.716392	1.2232	GO:0003677	/
BraA06g019784E	5.184	3.973	2.396	4.328	36.121	8.306	32.996	110.886	33.299	4.381	4.274	4.848	7.602	8.479	5.004	22.457	8.227	5.271	-0.190644	1.28539	2.39395	GO:0016020	/
BraA08g039794E	15.23	8.988	22.408	15.288	15.348	24.984	7.178	5.578	6.552	16.072	12.146	13.048	6.204	5.894	5.409	9.078	14.73	7.644	0.205878	1.69632	-0.626471	GO:0006950	/
BraA09g002142E	0.516	0.086	0.347	0.522	3.329	3.209	2.839	6.77	3.186	0.086	0.42	0	0.086	0.969	0.6	0.944	0.34	0.34	0.925274	2.15956	3.06649	/	/
BraA07g037234E	0.742	0.149	0.15	0.801	0.958	0.154	1.021	3.429	1.519	0.198	0.145	0.35	0.298	0.761	0.148	0.346	0.44	0.147	0.626643	0.691459	2.77253	/	K09422
BraA05g018765E	0.145	0.338	0.097	0.293	0.147	0.05	0.448	0.051	0	0.483	0.094	0.341	1.015	0.791	0.673	0.867	0.668	0.811	-0.624029	-2.32732	-2.16139	GO:0004190	/
BraA04g044061E	13.021	3.51	7.318	42.637	147.162	99.601	69.733	212.706	145.887	5.178	8.087	6.927	9.501	20.437	16.393	88.095	9.432	17.423	0.271849	2.70359	1.97539	GO:0004842	/
BraA05g014754E	134.972	170.142	110.064	153.815	137.867	241.189	49.64	60.906	72.495	127.555	156.683	180.788	186.132	157.045	164.701	187.477	191.791	164.086	-0.132074	0.0957615	-1.4921	GO:0015267	K09872
BraA06g020707E	15.928	5.197	7.1	5.212	10.749	5.802	4.051	11.922	7.417	9.335	9.322	5.527	12.37	13.906	21.127	7.759	9.793	7.213	0.256917	-1.07394	0.00949578	GO:0005524	/
BraA05g015948E	2.173	1.25	10.232	1.208	0.664	0.901	1.793	3.022	5.921	6.254	7.373	4.823	1.742	2.56	2.925	0.38	1.557	0.269	-0.412937	-1.36525	2.36123	/	/
BraA08g038024E	2.386	2.511	1.658	1.206	11.736	3.028	2.504	11.747	7.272	2.554	1.848	1.329	3.793	2.361	3.077	1.314	1.301	1.343	0.226895	0.867928	2.53591	GO:0003824	K00826
BraA10g044839E	1.228	1.075	1.948	5.399	2.564	3.372	3.008	3.254	3.833	1.967	1.289	1.796	1.292	2.013	2.326	4.259	3.155	3.28	-0.218525	1.01693	-0.00748152	GO:0003677	/
BraA02g030380E	19.938	13.955	20.654	40.209	60.072	42.679	57.161	114.627	77.249	16.929	17.133	17.454	15.003	25.698	21.851	58.336	15.495	17.638	0.112992	1.23163	1.5242	GO:0003824	/
BraA02g030219E	1.25	0.676	1.157	2.39	9.358	5.985	8.431	12.762	8.113	0.541	0.923	1.125	0.88	1.557	1.415	4.45	1.102	1.47	0.281303	2.26488	2.13964	GO:0004842	/
BraA05g014928E	0.476	0.455	1.789	6.94	25.324	13.959	11.437	51.143	33.117	0.824	0.592	0.743	0.629	0.843	0.777	19.757	3.211	2.378	0.359212	4.42174	1.99711	GO:0005515	/
BraA06g020690E	1.554	1.627	1.823	1.959	4.32	2.482	8.862	11.608	5.61	2.031	1.946	1.623	1.429	2.154	2.06	4.89	1.771	2.116	-0.132387	0.683605	1.65263	GO:0016020	/
BraA06g022878E	8.058	2.618	4.926	20.611	81.947	56.105	61.386	137.07	83.753	3.999	4.776	4.587	5.591	8.327	8.448	41.937	6.603	5.725	0.255783	2.8891	2.45615	/	/
BraA08g038822E	2.532	0.563	1.701	4.409	10.533	8.237	43.461	18.605	11.017	1.197	3.709	1.561	1.762	2.234	1.894	20.993	3.268	4.872	-0.40512	2.02519	1.39049	/	/
BraA03g013133E	0.941	0.797	1.058	1.464	8.776	4.277	0.485	4.218	3.678	0.362	0.636	1.279	1.016	1.076	0.83	0.506	0.608	0.645	0.326671	2.38008	2.34258	/	/
BraA04g043630E	3.239	2.348	2.033	2.8	6.695	4.087	5.859	6.455	5.068	2.914	2.613	3.316	4.375	2.934	3.464	2.952	2.738	2.23	-0.181135	0.38112	1.21474	GO:0005515	K00799
BraA04g044089E	1.241	1.33	1.518	1.076	0.632	1.195	2.195	1.024	1.877	1.332	2.338	1.432	2.399	2.271	2.829	1.859	1.227	0.965	-0.291893	-1.35127	0.400389	/	K20363
BraA07g036291E	4.316	3.164	4.736	11.839	45.363	17.539	6.921	42.302	35.867	4.578	6.845	2.976	3.854	5.473	5.796	10.963	7.899	5.54	-0.209941	2.36946	1.88856	GO:0005515	/
BraA09g006667E	6.232	3.629	0.997	1.367	7.961	3.828	2.585	1.696	2.094	5.117	5.249	3.561	12.921	11.656	9.208	4.674	6.291	3.981	-0.322657	-1.29509	-1.1532	GO:0005506	/
BraA01g024783E	24.095	11.571	21.577	25.402	79.581	51.688	48.863	113.851	71.564	15.67	21.118	15.032	18.952	32.213	15.267	44.404	20.119	14.027	0.173044	1.29315	1.66005	GO:0004672	/
BraA07g034723E	4.208	2.72	1.573	3.1	5.127	2.428	1.507	4.372	3.26	4.633	2.782	2.773	10.028	11.35	13.037	2.772	6.875	6.196	-0.224294	-1.65103	-0.700883	/	/
BraA02g031828E	0.293	0.13	0.985	0.494	5.347	1.216	6.995	12.422	7.004	0.62	0.828	0.493	0.621	0.768	0.553	3.189	1.192	0.806	-0.440145	1.94136	2.43051	GO:0005515	/
BraA03g007633E	19.879	14.716	15.887	37.025	50.446	39.465	64.346	75.861	58.956	17.47	13.547	16.851	16.468	27.111	20.662	49.035	17.946	25.309	0.109736	1.01837	1.18612	/	/
BraA08g040585E	3.841	3.343	11.453	8.776	29.109	10.628	3.645	6.975	9.105	5.037	6.227	4.457	3.118	2.518	1.8	4.141	5.505	5.283	0.269303	2.76233	0.481885	GO:0008168	/
BraA06g020253E	15.072	9.703	22.224	41.772	131.498	51.691	107.952	261.613	149.952	6.474	13.744	20.151	14.437	24.503	9.436	84.859	18.798	15.996	0.24658	2.2737	2.19898	/	K13464
BraA05g018365E	8.561	2.127	5.581	10.862	12.882	15.6	23.897	6.755	10.6	3.249	5.191	5.251	5.103	8.829	4.687	18.656	9.458	10.354	0.279846	1.11152	0.163754	/	/
BraA09g006784E	0.743	1.35	0.222	0.445	0.365	0.428	0.937	0.983	0.35	0.662	0.511	0.667	0.69	1.072	1.318	1.539	0.953	1.09	0.367724	-1.29069	-0.574183	GO:0046983	K14487
BraA01g025497E	2.176	1.659	3.017	4.138	5.706	5.001	4.178	5.111	5.313	1.898	3.198	2.826	1.49	2.207	1.59	4.731	6.516	3.517	-0.182242	1.52498	0.0641262	GO:0005622	/
BraA01g028147E	19.74	13.089	20.998	39.186	47.31	26.491	49.949	74.661	62.356	15.385	19.131	15.814	14.446	22.213	19.725	54.219	18.046	20.136	0.126215	1.03401	1.09282	GO:0004842	/
BraA06g019217E	1.083	0.506	1.6	0.438	0.368	0.075	0.298	0.379	0.382	0.506	0.917	1.093	1.736	1.553	1.224	0.937	0.571	1.214	0.369431	-2.3378	-1.28494	/	K19040
BraA09g006288E	7.822	5.217	20.888	21.298	9.57	39.162	21.817	6.169	25.099	10.691	13.864	16.831	2.986	6.573	3.096	19.748	35.427	17.159	-0.261892	2.48673	-0.382315	/	/
BraA07g037135E	9.453	3.761	0.649	5.539	1.751	1.336	0	4.172	1.478	7.313	1.259	11.816	10.227	13.648	6.321	4.075	8.601	13.818	-0.51231	-1.82067	-2.11928	/	/
BraA02g032310E	5.554	4.27	9.637	5.928	3.825	5.064	8.17	2.645	7.076	5.407	6.63	5.346	9.638	10.539	10.412	7.033	7.269	5.089	0.189834	-1.02868	-0.051184	GO:0003700	/
BraA08g041044E	5.215	3.788	27.142	7.162	9.464	17.736	15.507	16.898	9.779	6.992	10.224	9.21	3.794	7.206	4.301	7.884	8.514	4.466	0.472606	1.20502	1.09938	GO:0016020	/
BraA08g040712E	30.822	16.138	24.827	67.183	111.05	80.751	195.097	200.393	135.934	23.712	35.801	22.722	25.453	52.259	35.805	121.289	22.12	39.194	-0.166583	1.23186	1.61381	GO:0005509	K13448
BraA08g039592E	1.639	1.312	0.595	0.862	1.069	1.359	0.676	1.927	1.041	0.788	0.704	1.39	2.103	2.956	3.204	2.095	3.176	3.244	0.335631	-1.29857	-1.13395	/	/
BraA05g017441E	8.197	6.808	8.32	11.791	20.546	18.531	15.062	28.249	20.985	7.061	6.858	8.366	7.006	8.652	7.527	13.123	8.989	7.162	0.0971186	1.17563	1.21824	/	K09903
BraA09g001156E	21.377	9.816	29.104	29.336	20.444	36.656	19.505	9.747	26.354	14.578	28.173	28.877	12.202	19.784	8.713	19.022	28.472	27.459	-0.221753	1.10509	-0.362722	GO:0003824	K16055
BraA03g007772E	1.892	1.092	0.806	0.221	0.297	0.453	0.375	0.076	0.077	2.769	1.208	0.955	2.042	0.597	2.177	0.436	1.223	1.728	-0.342536	-2.28326	-2.59777	GO:0003700	K09286
BraA07g034013E	2.312	0.736	3.705	2.55	2.355	5.337	7.697	2.427	3.448	2.63	2.361	3.712	0.948	0.861	0.419	3.881	6.44	3.744	-0.33697	2.22769	0.0203518	/	/
BraA07g036814E	0.461	0.138	0.186	0.745	8.685	3.343	3.47	24.09	7.218	0.138	0.315	0.093	0.139	1.416	0.46	3.404	0.137	0.091	0.549745	2.74529	3.34829	/	/
BraA01g028341E	0.54	0.57	0.831	0.91	1.896	1.089	1.053	2.552	1.763	0.511	0.41	0.787	0.586	0.415	0.419	0.794	0.756	0.579	0.216047	1.49801	1.42089	GO:0005515	/
BraA03g008772E	26.532	18.372	20.021	22.039	63.067	34.616	43.149	55.647	34.578	24.22	20.73	15.855	31.281	31.289	30.611	26.641	17.895	15.495	0.126888	0.416174	1.23398	/	K01054
BraA03g009659E	25.165	35.273	21.115	22.041	21.28	15.402	16.271	21.265	22.035	34.53	27.521	29.003	77.976	72.756	58.863	39.466	37.347	41.757	-0.12615	-1.81382	-0.913863	GO:0009055	K02639
BraA09g006630E	15.278	10.673	20.852	33.354	32.998	52.812	8.893	19.666	25.159	9.742	13.504	18.993	12.146	19.021	10.215	15.251	16.832	17.737	0.176688	1.55435	0.188826	GO:0003677	K09287
BraA05g018688E	15.489	16.205	10.665	14.833	10.676	7.474	8.429	12.007	11.693	14.44	13.288	12.332	22.214	23.222	24.055	11.667	11.939	15.537	0.113238	-1.06166	-0.20358	GO:0046872	/
BraA06g018808E	31.671	9.446	10.553	69.063	165.978	95.365	169.853	174.846	144.957	12.605	15.225	16.923	23.705	38.144	35.362	124.791	22.701	30.561	0.242585	1.81764	1.52941	GO:0005737	K00640
BraA05g017213E	5.082	3.908	4.736	8.178	6.902	9.745	10.912	4.971	8.561	5.503	5.03	4.605	3.707	3.684	3.93	6.522	6.355	5.405	-0.110155	1.15624	0.488204	GO:0016021	K08202
BraA06g019830E	9.183	8.586	16.935	15.04	46.345	21.617	13.648	18.322	18.78	11.465	16.461	11.601	4.234	6.949	5.566	11.631	11.737	11.551	-0.161772	2.36746	0.619364	GO:0016021	/
BraA09g004217E	121.911	84.303	63.492	65.127	56.963	50.12	33.284	90.392	72.195	118.482	88.214	97.184	179.602	222.541	207.647	59.872	112.475	116.801	-0.137193	-1.8024	-0.470938	GO:0016747	/
BraA06g019408E	0.322	0	0.036	0.145	0.036	0	0.776	0.113	0.038	0.287	0.105	0.217	0.466	0.477	0.5	0.5	0.779	0.425	-0.720895	-2.98472	-0.807812	GO:0015743	/
BraA07g036399E	11.045	6.695	12.212	26.451	41.766	33.47	38.094	82.633	65.434	9.512	14.124	10.343	12.007	16.016	14.329	42.468	17.903	17.923	-0.153873	1.30349	1.33001	GO:0003676	/
BraA09g001581E	0.285	0.19	0.191	0.528	15.766	1.82	1.273	3.488	2.01	0.19	0.556	0.192	0.618	0.146	0.142	0.616	0.235	0.329	-0.468832	4.40479	2.60896	GO:0005509	/
BraA03g013071E	1.931	0.751	5.621	4.918	11.914	9.453	13.098	18.434	14.46	2.65	4.925	3.068	3.692	2.199	2.247	9.568	4.949	3.504	-0.336658	1.73831	1.43013	/	/
BraA04g042516E	6.168	1.503	4.302	16.87	55.909	47.21	14.358	55.95	32.893	1.979	4.788	3.112	3.883	7.13	5.521	18.63	6.488	7.356	0.305538	2.91721	1.75501	/	/
BraA05g018154E	2.531	0.936	2.938	6.175	16.424	14.828	11.41	24.606	19.102	1.377	2.365	1.666	1.875	2.312	1.921	7.196	2.448	2.559	0.271011	2.66701	2.25514	/	K11982
BraA03g008150E	9.512	6.953	8.764	17.28	50.607	36.413	37.842	88.189	71.592	9.17	8.93	9.228	7.38	9.715	6.809	50.754	13.315	9.443	-0.0840657	2.17972	1.50315	GO:0005515	/
BraA09g000659E	3.036	5.578	3.433	1.441	0.631	0.835	1.598	0.845	1.967	3.536	3.57	3.814	4.222	3.111	2.657	1.732	1.654	2.391	0.172897	-1.77343	-0.31907	/	/
BraA07g037673E	67.105	12.287	18.448	33.734	33.608	78.515	26.616	14.465	31.667	10.46	19.091	43.042	13.172	21.102	8.291	30.765	64.517	42.28	0.467237	1.80706	-0.847555	GO:0005515	/
BraA03g010831E	53.227	63.434	25.672	28.691	48.324	30.683	56.413	36.49	30.582	59.185	57.714	46.361	206.908	186.752	120.698	83.279	69.86	83.805	-0.164184	-2.21774	-0.86438	GO:0006099	K01595
BraA05g015605E	0	0.073	0.887	0.594	2.169	0.989	2.461	2.543	1.748	0.11	0.323	0.148	0.331	0.15	0.146	0.66	0.544	0.327	0.738713	2.63282	2.22238	/	/
BraA07g035754E	7.348	4.525	7.885	13.745	35.184	26.419	22.642	44.646	34.578	4.721	7.363	6.135	7.076	8.264	6.278	20.046	9.25	7.224	0.145388	1.85228	1.56008	GO:0004190	/
BraA06g023005E	1.477	1.372	0.779	0.96	0.681	0.729	0.907	1.107	1.079	1.584	1.511	1.171	1.515	1.513	2.806	0.807	0.869	1.427	-0.200906	-1.27951	0.0756182	GO:0009055	/
BraA06g019941E	19.502	15.358	17.759	22.51	45.32	39.72	18.873	20.777	20.435	19.581	17.013	20.031	16.039	19.057	20.183	16.35	22.035	20.617	-0.0738929	1.00732	0.107122	GO:0005524	/
BraA08g038675E	0.831	1.663	2.657	0.804	0.589	1.124	0.82	0.569	1.798	2.243	2.082	1.823	1.811	1.74	1.73	0.685	1.893	0.715	-0.228569	-1.0485	0.0224695	/	/
BraA06g019622E	70.799	50.106	8.614	18.147	30.299	11.803	75.85	49.867	32.648	42.508	25.484	32.283	86.979	71.105	74.686	140.832	33.697	90.698	0.408722	-1.91097	-0.672062	GO:0004185	K16297
BraA01g027782E	0.5	0.625	0.797	1.011	3.777	1.727	2.364	3.805	2.778	0.667	1.099	0.589	1.378	0.555	0.956	1.248	1.194	1.072	-0.266747	1.22995	1.4319	/	/
BraA03g010713E	15.257	4.8	2.61	6.5	2.639	3.133	0.099	5.993	3.605	13.066	6.326	9.296	31.974	33.281	38.136	2.491	13.896	12.439	-0.299133	-3.07291	-1.46593	GO:0016491	K06892
BraA07g037306E	2.402	3.64	2.786	2.06	1.038	0.981	0.676	1.604	1.54	2.623	1.564	3.598	3.792	3.504	5.225	2.47	2.805	2.016	0.215223	-1.6066	-0.851721	GO:0009733	K14488
BraA06g021357E	0.896	0.657	0.542	0.181	0.243	0.248	0.185	0.063	0.126	0.359	0.175	1.085	1.377	0.796	0.715	1.014	0.236	0.059	0.409923	-2.07848	-1.74541	/	/
BraA07g035073E	4.351	12.224	1.958	3.557	2.452	6.236	1.719	5.344	3.037	4.541	3.978	6.726	7.978	10.433	11.817	3.142	5.124	6.137	0.316667	-1.27934	-0.418962	/	/
BraA02g032816E	1.849	1.345	1.016	6.628	13.955	7.839	0.52	7.058	5.96	1.346	1.149	1.103	1.179	1.206	1.006	0.503	1.163	0.915	0.260111	3.11298	2.48449	GO:0030001	/
BraA02g030372E	1.313	1.139	1.367	2.169	3.523	2.722	5.148	7.49	4.448	1.622	1.368	1.414	1.053	1.525	1.353	4.501	2.034	1.429	-0.174094	1.13637	1.18211	/	/
BraA09g006102E	0.067	0.067	0.235	0.707	4.309	0.69	3.711	16.502	4.688	0.067	0.163	0	0.033	0.068	0.133	5.652	0	0.132	0.697903	4.68136	2.19142	GO:0046983	/
BraA01g024102E	3.108	4.436	4.276	8.008	13.088	13.708	3.753	13.048	14.68	2.618	4.071	4.207	3.76	5.669	3.666	8.172	4.083	2.588	0.14592	1.45048	1.1622	/	/
BraA05g014332E	10.678	6.881	4.311	3.518	13.282	10.114	5.776	3.358	3.767	10.451	4.257	4.48	11.823	12.006	12.484	10.46	10.911	11.674	0.226976	-0.37365	-1.28159	GO:0004650	K01184
BraA02g028788E	0.571	0.176	0.089	3.556	10.121	8.383	5.306	13.889	8.607	0.088	0.515	0.621	0.352	1.396	1.227	5.222	0.608	0.913	-0.516414	2.94742	2.12227	GO:0004842	K11968
BraA10g047325E	5.136	3.483	5.197	14.315	26.183	20.38	22.111	40.737	38.294	4.598	5.603	4.949	5.738	6.649	5.929	28.082	7.569	8.516	-0.103279	1.7763	1.26979	GO:0004672	/
BraA02g033155E	0.652	1.387	0.575	3.545	8.556	8.028	2.944	14.379	19.245	0.735	1.115	1.481	0.082	0.251	0.163	2.198	2.902	0.645	-0.317922	5.39884	2.75119	GO:0003700	/
BraA06g021952E	9.308	4.977	5.578	20.809	22.806	24.117	35.18	26.111	32.186	6.748	5.799	5.871	8.443	8.756	8.642	34.883	15.03	13.935	0.142485	1.41911	0.618575	/	K09422
BraA02g030918E	20.942	21.63	2.987	14.053	6.167	6.787	4.716	10.505	5.165	10.267	9.291	18.453	9.843	15.634	9.611	16.095	18.929	31.175	0.299062	-0.377844	-1.60613	/	/
BraA02g029138E	19.528	20.146	32.725	15.994	20.228	15.082	11.089	27.397	24.791	26.084	24.114	17.29	34.011	29.579	42.882	20.571	24.545	17.419	0.129641	-1.02023	0.102455	GO:0004356	K01915
BraA03g009664E	1.258	1.258	1.964	4.578	5.061	11.015	4.736	4.819	6.057	0.819	1.413	1.65	1.828	2.448	2.007	4.583	3.046	3.485	0.234913	1.7507	0.565003	/	/
BraA02g030341E	58.467	88.27	49.398	34.832	15.878	13.173	10.282	20.083	23.01	34.627	118.644	76.688	15.888	30.158	10.674	39.332	83.117	48.256	-0.202205	0.166702	-1.59317	/	/
BraA04g044591E	1.941	0.999	0.335	1.29	1.186	1.667	0.515	1.397	1.644	1.166	0.867	0.616	4.057	3.012	2.931	0.775	1.699	1.756	0.343757	-1.24898	-0.167568	/	/
BraA09g003960E	0.942	0.566	1.646	1.651	2.368	4.428	6.027	0.989	1.928	1.069	0.859	2.029	0	0.515	0.125	1.192	2.67	1.492	-0.297195	3.76821	0.80868	GO:0009522	K02694
BraA08g037883E	0.243	0.213	0.184	0.8	3.657	1.387	7.501	6.419	3.252	0.274	0.297	0.246	0.488	0.592	0.516	3.25	0.361	0.632	-0.320338	1.93705	2.08815	GO:0003700	K09286
BraA03g008686E	39.875	27.058	27.459	73.159	139.189	105.196	198.122	209.207	143.797	34.758	40.917	28.632	38.632	50.712	55.269	131.172	37.554	44.078	-0.112764	1.18096	1.44723	GO:0005509	K02183
BraA09g005809E	16.544	7.347	12.155	69.029	140.133	102.295	168.547	252.956	223.657	9.858	11.902	11.524	10.19	19.514	10.584	153.911	20.501	23.279	0.146401	2.99693	1.7763	GO:0003824	K14803
BraA07g034196E	1.95	0.551	1.025	8.7	25.953	16.255	23.439	57.534	30.418	0.552	1.615	0.727	0.68	2.215	1.649	28.562	1.634	1.888	0.313182	3.54483	1.87219	GO:0003723	/
BraA05g014245E	8.202	14.554	9.16	4.501	2.914	0.628	4.788	2.744	3.408	4.002	13.691	10.533	16.687	18.225	9.351	9.115	9.138	6.148	0.204151	-2.46107	-1.08459	GO:0006099	K01595
BraA08g038771E	3.982	2.313	5.436	6.689	13.022	8.987	18.421	23.801	13.529	3.73	5.144	4.667	4.763	4.87	5.573	10.964	5.079	6.356	-0.179288	0.960203	1.39724	/	/
BraA05g015544E	39.882	32.383	37.054	41.253	104.113	79.756	53.39	86.475	58.161	41.24	37.909	37.606	39.676	36.891	35.473	41.021	44.307	40.135	-0.063501	1.05733	0.744912	GO:0008152	/
BraA08g040173E	1.182	1.058	0.282	0.503	1.268	0.419	3.916	1.111	0.692	1.558	1.064	0.565	3.243	1.881	2.762	1.522	1.323	1.632	-0.300441	-1.80176	0.424172	GO:0016020	K08150
BraA02g029074E	22.814	15.149	27.919	52.336	113.331	87.655	73.923	89.713	66.414	31.364	18.028	24.621	41.411	36.863	42.247	31.419	22.844	34.279	-0.135943	1.11948	1.45944	GO:0004601	K00430
BraA08g039576E	2.066	2.066	0.11	1.869	0	0.113	3.813	1.141	0.115	2.612	0.956	2.304	4.031	6.015	5.53	0.868	5.911	4.518	-0.427967	-3.02119	-1.0737	/	/
BraA09g000603E	2.439	1.917	2.246	4.755	3.975	5.452	3.414	3.876	6.194	2.058	2.348	2.988	1.292	1.999	1.911	3.338	4.958	3.93	-0.132154	1.47155	0.216958	GO:0000160	K12130
BraA09g001092E	0.028	0.024	0.033	0.053	0.276	0.092	0.058	0.302	0.193	0.028	0.02	0.02	0.045	0.021	0.016	0.04	0.032	0.024	0.34597	2.43317	2.6103	GO:0005515	/
BraA04g044035E	5.054	2.03	4.05	7.084	43.414	22.223	7.149	51.768	30.921	3.067	5.235	4.598	5.449	5.453	3.933	10.014	7.456	4.471	-0.18283	2.36055	2.12664	GO:0006486	/
BraA05g014857E	4.478	2.804	3.925	6.147	41.836	14.15	7.775	52.739	23.312	3.791	5.049	3.674	5.619	3.805	4.248	11.775	4.031	5.224	-0.129607	2.25557	2.08876	/	/
BraA09g000304E	238.487	499.13	91.71	148.997	452.213	577.865	115.894	167.549	113.631	332.045	282.672	439.397	931.684	832.937	587.228	261.293	1444.5	588.636	-0.310801	-0.9452	-2.43765	/	/
BraA02g032636E	4.048	2.843	4.132	7.617	23.733	14.449	15.322	43.507	25.31	3.812	4.687	3.652	4.084	4.148	3.69	15.04	6.916	4.298	-0.111139	1.99745	1.76591	GO:0004672	/
BraA09g005014E	12.309	3.572	4.439	25.004	81.619	57.288	32.175	71.261	58.823	5.629	6.344	6.019	10.964	13.468	16.594	41.601	10.251	12.668	0.21043	2.0574	1.40741	GO:0004842	/
BraA08g039643E	0.161	0.537	0.108	0.652	2.298	0.779	0.222	3.777	3.013	0.269	0.105	0.217	0.861	0.275	0.375	0.214	0.159	0.425	0.487133	1.35563	3.22566	/	/
BraA10g046677E	24.981	9.413	45.82	31.648	12.812	42.634	12.277	6.274	20.857	19.412	39.851	41.766	29.098	51.855	13.732	23.865	50.616	44.992	-0.308152	-0.111761	-1.53221	GO:0030001	K01533
BraA09g004542E	35.683	37.506	49.471	105.698	261.608	179.504	217.632	355.574	268.922	44.64	40.623	46.818	42.311	43.402	39.817	127.272	62.841	73.026	-0.0767605	2.17377	1.75889	GO:0005515	K00799
BraA08g039497E	17.946	13.775	21.362	41.323	64.688	59.676	40.861	87.107	90.669	17.37	20.642	19.523	17.386	19.539	16.593	51.406	26.654	19.734	-0.0870047	1.66948	1.23797	GO:0043531	/
BraA07g036986E	2.431	1.081	0.204	3.619	3.578	4.97	6.062	5.105	4.789	1.488	0.396	1.022	0.135	0.969	0.943	3.101	1.068	2.54	0.398432	2.60444	1.32462	/	/
BraA04g042024E	8.667	12.378	3.217	5.592	6.68	5.85	5.117	6.703	3.742	10.047	5.346	6.042	15.199	9.99	13.932	6.83	3.663	8.35	0.215647	-1.08126	-0.191895	GO:0016491	/
BraA08g040611E	3.974	3.274	4.057	4.563	12.803	7.212	8.81	25.102	10.999	4.194	3.635	4.373	3.748	3.592	2.995	8.687	4.461	4.199	-0.0786378	1.3027	1.46333	GO:0003824	K10526
BraA04g044667E	4.714	4.251	3.813	6.033	4.423	3.682	6.683	9.238	8.798	4.394	3.991	3.983	5.352	4.925	5.326	4.937	3.053	4.067	0.0789954	-0.126525	1.1146	/	/
BraA09g000303E	12.19	16.195	23.515	15.512	4.152	3.148	2.459	7.185	9.401	12.667	25.838	19.907	11.869	17.336	14.419	15.7	29.343	19.558	-0.145297	-0.957277	-1.67916	/	K01728
BraA07g036553E	11.181	3.611	5.499	19.316	34.799	44.528	61.578	56.651	49.292	3.526	8.082	13.06	6.97	11.276	5.444	43.679	24.454	15.158	-0.248983	2.10037	1.08244	/	/
BraA09g000851E	5.974	8.175	2.725	6.666	2.985	6.425	2.732	2.307	3.459	7.222	6.495	5.801	7.455	6.352	10.285	6.132	7.966	8.086	-0.175896	-0.572461	-1.30855	/	/
BraA10g048001E	11.286	7.627	3.335	4.26	10.884	4.731	3.053	3.212	2.283	8.135	7.593	4.049	12.717	9.867	10.405	5.908	7.982	8.884	0.204884	-0.681075	-1.33095	GO:0005576	/
BraA01g028085E	0.211	0.188	0.402	0.617	1.267	1.678	0.847	1.896	1.341	0.141	0.458	0.403	0.188	0.361	0.491	0.586	0.371	0.255	-0.298819	1.82318	1.83713	/	/
BraA09g005557E	9.054	7.344	18.057	8.906	6.668	7.862	8.393	7.513	9.906	6.492	13.084	11.421	3.924	5.014	2.867	8.855	10.159	8.172	0.177246	1.00768	0.000954302	/	/
BraA09g001405E	1.82	2.205	1.207	3.487	2.489	4.419	4.349	3.017	2.89	1.967	1.871	2.127	1.536	1.276	0.812	3.921	4.262	5.736	-0.156285	1.53862	-0.362723	GO:0003677	/
BraA07g034658E	7.448	5.944	10.184	10.761	14.246	21.495	9.463	12.448	15.817	7.007	7.772	7.761	6.818	7.046	6.628	10.309	10.713	8.416	0.0936026	1.21855	0.435133	GO:0015031	K19476
BraA01g025570E	1.349	1.271	1.04	0.562	0.728	0.329	0.409	0.833	0.84	0.954	1.551	1.842	1.75	3.497	2.771	0.951	1.883	1.65	-0.217161	-2.27772	-1.0244	/	/
BraA09g006070E	7.13	6.541	1.822	4.466	3.933	3.496	2.368	4.49	2.024	3.343	2.921	7.3	11.292	8.73	7.284	4.131	13.716	8.431	0.229101	-1.17946	-1.46823	GO:0016020	K21398
BraA09g004642E	171.84	148.927	225.727	135.885	64.062	48.668	143.361	132.487	160.312	191.679	235.253	165.598	190.903	180.942	241.872	191.553	155.68	153.776	-0.088435	-1.30554	-0.125304	GO:0006952	/
BraA10g045625E	10.283	10.073	6.732	3.671	6.901	5.977	21.499	9.096	11.529	7.515	11.473	10.87	11.712	12.912	9.494	13.372	15.382	10.96	-0.109228	-1.00227	0.156074	GO:0016020	/
BraA07g036715E	51.893	68.611	90.794	43.631	32.917	24.84	10.706	22.275	24.8	18.033	104.635	52.475	20.587	38.735	22.337	48.775	62.398	40.126	0.292839	0.327032	-1.30667	/	K01728
BraA07g035591E	8.325	5.236	11.572	11.969	9.483	17.257	3.261	2.507	6.06	6.717	10.978	10.493	2.535	4.031	2.697	4.804	10.069	6.639	-0.138324	2.08757	-0.790958	GO:0008152	/
BraA06g022748E	29.249	22.073	23.022	38.43	73.051	57.939	81.483	144.708	93.213	24.18	22.998	25.354	25.503	27.404	25.564	66.539	28.179	26.145	0.0678403	1.15464	1.48348	/	/
BraA02g030526E	3.157	4.365	5.2	6.684	13.979	8.583	2.203	4.639	7.409	5.15	4.225	4.479	4.764	4.794	3.963	2.929	5.36	5.604	-0.0930623	1.15864	0.116144	GO:0004672	/
BraA07g037506E	200.721	204.205	107.28	138.39	171.785	107.501	106.078	199.616	181.175	170.538	150.266	167.165	322.582	294.008	275.687	255.64	304.546	231.636	0.104087	-1.06486	-0.617348	GO:0003824	K01087
BraA07g034874E	0	0.504	0.592	0.424	1.026	0.522	0.173	6.343	2.043	0.504	0.082	0.169	0.336	0.086	0.167	0.084	0.249	0	0.567778	1.78137	4.7953	/	/
BraA05g015774E	0.679	0.6	0.184	0.343	4.546	2.083	0.619	4.274	2.624	0.261	0.892	0.658	0.288	0.214	0.182	0.521	0.335	0.155	-0.277548	3.42435	2.98524	/	/
BraA06g022962E	14.297	9.446	10.587	22.976	29.237	24.106	71.982	48.886	47.314	10.842	11.618	10.551	9.73	13.938	13.726	50.217	15.872	14.886	0.0880967	1.06342	1.12232	GO:0007165	/
BraA04g043805E	2.929	2.557	5.285	6.327	10.281	7.479	5.769	14.982	13.668	4.079	3.563	4.353	3.069	3.301	2.443	9.33	7.186	5.507	-0.126569	1.48885	0.72709	GO:0005515	/
BraA09g000250E	40.364	22.17	47.037	66.074	43.567	72.385	105.41	40.477	70.551	24.877	36.659	41.018	19.694	25.024	18.506	55.463	71.061	55.959	0.124105	1.54268	0.315232	/	/
BraA05g017733E	1.031	0.971	0.947	1.012	3.121	1.226	2.253	3.662	1.509	0.972	0.948	1.408	1.003	1.647	1.24	1.151	0.78	0.901	-0.141613	0.518242	1.47953	GO:0000413	/
BraA06g023223E	9.168	2.906	5.919	12.663	25.979	13.182	16.384	25.55	23.028	4.977	6.81	4.496	8.088	8.996	9.272	14.694	5.744	9.2	0.174849	1.02192	1.20998	GO:0005509	K13448
BraA02g032210E	2.486	1.074	0.455	4.399	29.933	18.097	15.739	30.903	15.968	1.018	1.435	0.969	2.435	4.748	5.241	14.891	1.787	3.131	0.265339	2.14953	1.73912	GO:0005515	/
BraA10g047706E	95.53	35.126	57.552	239.864	434.836	394.728	384.863	690.521	568.071	44.022	68.769	61.609	74.305	109.223	92.242	362.941	108.372	119.883	0.14134	1.99969	1.55164	/	/
BraA08g039988E	0.971	1.666	0.885	1.309	0.707	0.863	1.097	0.874	1.42	1.019	0.678	1.447	2.364	1.848	2.399	1.293	3.292	2.06	0.198894	-1.18566	-0.893411	GO:0006508	K01365
BraA07g034192E	1.096	0.47	3.102	4.38	2.871	2.759	64.938	7.561	7.568	1.934	2.039	1.686	1.308	1.284	0.521	13.703	7.687	6.405	-0.253041	1.69681	1.58535	/	K09422
BraA06g018852E	2.331	1.767	2.918	2	1.511	0.439	4.737	6.081	2.318	2.051	2.484	1.925	1.416	2.172	2.466	1.552	1.536	1.119	0.147482	-0.600401	1.73094	/	/
BraA03g007746E	5.623	3.504	12.314	8.335	20.874	18.348	17.697	23.91	17.526	8.254	8.33	7.766	7.091	7.69	5.465	8.515	10.527	7.615	-0.157395	1.28127	1.23394	GO:0003700	K14487
BraA01g027517E	8.157	3.511	13.951	7	11.015	17.171	21.95	7.202	11.812	8.958	11.363	8.934	6.907	5.799	4.383	7.511	14.219	9.448	-0.165317	1.08001	0.464531	GO:0004185	K16297
BraA01g024940E	0.226	0.151	0.114	0.114	0.192	0.039	0.117	0.237	0.08	0.264	0.037	0.076	1.17	0.656	0.751	0.338	0.372	0.186	0.421016	-2.87085	-0.961388	GO:0016021	/
BraA03g008014E	33.449	24.49	40.686	53.607	69.585	49.691	102.877	97.221	93.845	22.646	38.892	32.047	21.48	40.397	20.645	74.605	44.046	45.489	0.103228	1.09981	0.915631	/	/
BraA06g019862E	0.527	0.486	0.204	0.573	3.92	0.42	0.418	5.443	3.13	0.122	0.356	0.531	0.812	0.208	0.081	0.485	0.4	0.04	0.303256	2.22599	3.37425	GO:0004672	K00924
BraA06g018964E	40.403	62.594	5.106	52.055	64.802	59.792	83.652	52.156	100.11	51.216	20.261	72.606	207.951	135.4	129.098	122.081	166.627	157.293	-0.37482	-1.38932	-0.847489	GO:0016491	/
BraA09g002303E	4.559	2.105	2.614	22.834	57.553	46.814	56.255	101.269	77.164	2.879	4.076	3.468	2.987	5.785	5.281	42.498	3.917	7.044	-0.136227	3.23185	2.20655	/	/
BraA08g039891E	0.12	0.239	0	0.907	2.923	1.983	0.432	5.083	1.202	0.06	0.234	0.241	0.06	0.368	0.298	0.716	0.295	0.237	-0.543114	3.0612	2.53199	GO:0009733	K14488
BraA01g025607E	101.233	126.751	279.862	103.218	32.555	23.785	49.229	62.981	118.038	136.84	194.96	138.411	130.304	158.001	137.908	120.055	144.372	190.634	0.135378	-1.43587	-0.908812	GO:0005576	K20628
BraA05g017099E	6.796	4.606	19.845	7.536	12.092	15.353	13.86	8.12	13.789	12.448	12.754	10.714	7.281	6.193	4.435	10.567	14.611	11.59	-0.176344	1.00362	0.032392	GO:0006855	K03327
BraA02g033159E	4.347	2.783	6.377	11.146	60.938	41.596	20.988	58.301	33.79	4.387	7.031	3.755	7.946	8.303	8.428	18.851	7.735	6.745	-0.142035	2.26938	1.84797	/	K07192
BraA04g044639E	1.357	2.004	7.227	3.79	2.436	9.043	0.467	0.746	1.436	2.912	4.545	5.152	3.562	3.841	1.676	2.064	3.641	7.674	-0.229658	0.772653	-2.2602	/	/
BraA04g044163E	16.875	10.993	14.233	27.537	76.84	68.577	17.247	45.562	31.65	11.473	14.181	14.812	23.125	22.357	24.97	30.087	20.482	17.708	0.0879724	1.34887	0.554452	GO:0003676	/
BraA03g010153E	6.762	3.936	5.623	4.45	18.762	12.997	3.247	8.492	8.146	5.318	6.268	6.154	4.904	4.384	4.022	4.148	8.288	4.866	-0.0893336	1.50405	0.28818	GO:0005216	K05391
BraA02g030907E	4.165	2.444	8.149	2.146	2.692	2.324	1.198	3.237	2.797	5.493	7.079	4.203	6.1	9.067	9.784	2.958	6.412	5.508	-0.159601	-1.76835	-0.952065	GO:0016021	/
BraA07g037145E	163.702	95.89	435.566	223.019	373.646	605.011	147.389	154.139	201.351	245.499	275.085	270.935	198.487	167.07	195.082	52.704	198.833	162.159	-0.162535	1.14213	0.363747	GO:0004866	/
BraA09g002017E	12.312	12.446	16.008	16.722	23.422	15.239	27.257	46.127	33.733	13.292	15.102	14.857	10.851	15.217	12.814	24.098	13.361	12.293	-0.0561131	0.546162	1.18788	/	/
BraA10g046895E	0.812	0.677	1.091	1.626	2.205	2.322	0.993	1.894	2.498	0.587	0.793	1.032	0.467	0.863	0.585	1.261	1.471	0.774	0.126122	1.7207	0.697429	GO:0005515	/
BraA09g000460E	9.036	10.335	15.566	22.96	10.585	18.948	14.665	19.918	28.944	11.972	10.59	15.44	6.429	7.098	7.75	19.092	18.28	16.6	-0.0919412	1.31053	0.310573	GO:0004672	K08867
BraA02g033020E	5.099	7.312	10.503	8.879	8.947	11.157	11.105	4.58	7.676	2.156	12.893	5.089	2.725	2.67	1.243	2.149	3.976	8.13	0.206887	2.15175	0.785381	GO:0003677	/
BraA10g047965E	22.595	23.59	23.395	37.29	29.155	37.019	34.467	31.334	37.163	20.874	21.105	26.689	11.939	10.302	12.685	35.677	43.296	32.64	0.0502039	1.58711	-0.0395149	GO:0000160	K12129
BraA02g030717E	10.042	9.829	0.87	10.371	4.51	8.617	0.111	5.214	1.828	7.567	3.164	15.255	15.473	18.364	14.537	10.132	34.046	24.146	-0.284422	-1.03368	-3.14502	/	/
BraA06g023612E	26.33	14.12	27.349	79.035	31.795	51.843	102.496	45.334	82.483	20.656	19.118	25.106	17.397	29.87	21.838	89.779	43.211	35.113	0.0944357	1.23624	0.516991	/	K12448
BraA03g008717E	0.03	0.151	0.274	1.068	0.492	0.438	0.779	0.539	1.214	0.06	0.354	0.183	0.061	0.031	0	0.723	0.776	0.807	-0.374346	4.45041	0.205207	GO:0016020	/
BraA06g020679E	50.6	27.392	50.589	63.45	105.381	81.417	68.949	133.304	105.136	39.586	51.263	31.527	24.202	42.138	33.451	66.582	47.499	44.055	0.100294	1.36863	1.04216	GO:0006629	K18875
BraA10g046268E	0.069	0.139	0.14	0.386	5.485	1.62	1.111	10.94	2.831	0.209	0.136	0.105	0.244	0.32	0.139	1.283	0.206	0.206	-0.337288	3.49418	3.23181	/	/
BraA09g004811E	0.06	0.18	0.302	0.728	2.323	2.799	0	1.575	1.778	0.3	0.117	0.303	0.06	0.123	0	0.12	0.415	0.238	-0.378478	5.05733	2.20788	/	/
BraA08g038619E	1.626	0.952	0.519	0.602	0.566	0.288	0.409	0.916	0.756	1.39	0.697	0.68	1.868	1.544	2.413	0.356	1.647	0.942	0.200376	-1.9776	-0.411447	GO:0008168	/
BraA02g030827E	20.857	30.324	1.579	15.242	5.559	7.504	1.839	20.362	7.206	29.754	14.565	24.755	43.59	47.113	79.698	22.222	25.423	44.966	-0.349227	-2.59082	-1.54837	GO:0003700	/
BraA03g010140E	4.629	3.678	9.67	5.85	1.202	0.423	0.866	1.167	1.585	4.271	8.156	7.671	1.114	2.86	1.539	2.446	4.957	4.042	-0.136218	0.403873	-1.58168	GO:0005515	/
BraA04g042898E	154.682	193.498	115.465	130.042	189.924	133.126	94.992	140.844	138.718	192.886	146.838	159.551	433.145	323.558	316.153	217.036	239.426	264.366	-0.0733628	-1.20859	-0.862485	GO:0004616	K00033
BraA02g031944E	0.24	0.256	0.29	0.388	1.596	0.48	0.643	3.356	1.404	0.256	0.297	0.339	0.208	0.246	0.239	0.686	0.49	0.443	-0.15229	1.89338	1.83584	GO:0005515	/
BraA06g019675E	3.596	3.753	6.405	4.373	2.23	3.294	1.236	1.367	2.482	4.226	4.733	6.153	4.021	5.82	4.002	2.965	5.923	7.425	-0.107386	-0.473382	-1.60535	/	/
BraA02g028585E	4.077	3.545	5.873	5.355	7.142	4.463	2.634	8.24	5.727	3.51	4.391	4.999	1.986	3.397	2.242	4.108	4.934	4.223	0.0937742	1.18725	0.413681	GO:0004672	/
BraA09g005074E	0.973	0.521	2.45	1.545	11.891	2.412	3.261	4.121	3.236	0.87	1.154	1.472	2.716	1.993	1.42	1.318	1.786	1.134	0.19934	1.44429	1.40768	GO:0008152	K13496
BraA05g014608E	52.12	36.724	40.902	29.764	18.672	22.897	11.276	10.91	19.887	32.986	50.078	42.961	33.915	35.409	35.41	24.123	35.299	29.612	0.0722171	-0.541077	-1.00763	/	/
BraA02g029127E	18.784	12.298	11.417	30.703	38.846	34.048	47.261	60.205	52.22	14.273	11.904	15.06	13.345	19.439	17.443	44.482	13.183	18.732	0.0775195	1.07874	1.13804	GO:0003984	K01653
BraA06g022217E	112.855	80.216	41.573	100.193	133.807	195.855	59.66	73.429	66.934	79.232	70.284	111.136	72.918	76.829	54.246	68.112	145.751	127.11	-0.115752	1.11053	-0.684607	GO:0003824	K01087
BraA01g027335E	10.286	2.582	7.18	38.599	106.237	82.69	156.026	204.216	148.332	4.281	7.45	6.648	7.258	19.104	12.794	106.793	16.336	21.576	0.155633	2.59414	1.88553	GO:0003676	/
BraA02g032070E	256.188	278.263	97.242	202.163	191.804	382.147	108.316	89.53	94.986	210.313	228.382	262.774	265.1	213.039	216.812	259.682	246.158	182.458	-0.116646	0.188005	-1.15728	GO:0015267	K09873
BraA05g017385E	3.224	3.06	6.091	4.075	5.652	3.194	14.577	7.566	7.101	4.154	3.821	3.804	3.184	2.867	3.547	5.349	4.757	3.66	0.0992635	0.463158	1.16	GO:0016021	/
BraA03g010073E	2.836	1.773	6.427	1.433	12.421	3.894	6.508	14.659	10.954	0.923	0.554	12.662	3.481	4.939	1.555	1.698	1.542	5.541	-0.327742	0.903849	1.95999	GO:0005515	K00799
BraA04g044230E	55.657	24.977	150.45	84.314	239.863	250.778	32.564	122.998	100.521	57.757	57.512	85.879	62.621	49.129	54.815	10.411	46.438	39.593	0.225491	1.8396	1.50414	GO:0004601	K00430
BraA02g028561E	63.92	40.227	14.825	21.8	20.768	13.98	12.123	47.251	24.821	55.709	33.484	45.942	97.339	132.868	137.377	27.134	74.191	52.278	-0.14529	-2.67638	-0.767236	GO:0005515	K00799
BraA08g040207E	2.426	0.794	0.4	1.829	3.37	2.652	2.457	2.871	3.735	1.325	1.206	1.781	1.326	1.04	1.188	2.246	0.741	2.444	-0.21377	1.18304	0.812328	GO:0016788	/
BraA03g009660E	15.005	5.707	4.684	46.814	151.261	78.363	106.9	251.429	154.585	6.768	9.35	7.492	10.024	26.543	13.522	122.671	11.587	14.306	0.139551	2.52329	1.86371	GO:0004553	/
BraA10g046987E	0.571	2.286	0.785	2.836	0.212	0.7	0	0.545	0.495	1.144	0.913	2.254	2.759	3.725	2.486	4.251	14.169	7.452	-0.209606	-1.29419	-4.54742	GO:0005506	/
BraA06g022535E	149.629	172.484	207.18	222.626	255.095	405.15	101.043	138.828	197.871	162.163	151.298	255.685	138.152	126.93	113.565	99.032	136.701	171.295	-0.0743432	1.25348	0.183387	GO:0005975	K01057
BraA04g041951E	22.589	17.026	24.226	68.784	118.211	91.265	116.013	261.153	183.681	17.305	26.508	24.669	13.999	21.831	17.105	112.701	21.148	26.858	-0.0724059	2.43677	1.88072	/	/
BraA05g014572E	9.743	10.942	12.223	16.149	28.927	25.038	18.906	48.512	32.813	10.77	11.779	12.208	14.954	11.949	11.089	19.271	9.917	11.361	-0.0489919	0.924914	1.39091	GO:0004672	/
BraA01g024186E	4.585	4.364	5.942	6.239	20.223	10.069	13.985	40.921	23.187	4.963	5.276	4.302	3.999	5.002	3.955	12.37	5.022	5.223	0.0633824	1.5532	1.8745	GO:0003676	/
BraA09g006816E	20.467	16.789	23.863	33.278	59.647	41.173	36.318	76.413	46.961	19.5	19.958	20.779	18.711	24.904	21.06	35.638	20.292	23.561	0.051003	1.09523	1.09236	GO:0008883	K02492
BraA07g037118E	1.884	0.603	0.987	1.485	4.183	1.718	3.77	5.615	2.711	1.056	2.207	0.76	0.68	0.965	0.977	3.309	1.266	0.746	-0.183638	1.5493	1.26645	/	/
BraA09g006967E	1.122	0.388	0.609	5.627	2.022	4.069	1.291	2.581	5.708	0.518	0.421	0.958	0.519	0.53	0.516	1.12	2.26	0.384	0.194746	2.90543	1.4215	GO:0016491	/
BraA02g029708E	6.382	6.069	12.263	18.958	11.798	24.333	12.882	10.007	16.76	8.677	7.502	10.773	5.566	6.175	5.971	10.067	17.132	10.914	-0.0964579	1.65542	0.131338	/	/
BraA01g024068E	5.673	5.895	6.047	10.176	14.95	21.317	8.608	23.396	20.064	3.554	6.648	6.722	4.291	9.037	4.964	10.741	10.129	4.382	0.0864009	1.38361	1.12854	GO:0004672	K00924
BraA09g000748E	4.929	10.788	3.687	4.687	6.065	7.687	0.906	4.303	4.442	7.377	3.908	10.735	18.534	11.199	11.631	5.358	7.187	6.325	-0.146974	-1.13448	-0.881554	/	/
BraA05g017983E	18.864	7.897	2.221	7.256	4.752	3.453	0.212	7.964	4.178	13.857	7.359	12.674	29.538	37.711	36.092	6.447	21.585	21.811	-0.184841	-2.72784	-1.90614	GO:0016491	K06892
BraA09g001548E	61.199	47.676	9.941	28.266	10.123	9.32	1.877	30.596	16.406	63.305	31.952	46.963	81.738	153.659	147.854	22.459	86.433	53.772	-0.219775	-3.01431	-1.62868	GO:0006520	K14454
BraA10g047056E	0.24	0.528	0.145	0.048	0.098	0.199	0.989	0.403	0.66	0.24	0.094	0.435	0.865	0.835	0.574	0.479	0.284	0.474	0.284646	-2.69575	0.800194	/	K01054
BraA07g035137E	18.632	12.228	14.593	30.706	78.444	48.638	56.272	167.029	98.025	13.964	16.382	14.237	13.032	21.435	13.479	63.724	19.108	13.747	0.0589477	1.77062	1.81743	GO:0004672	K13412
BraA06g019799E	22.822	16.15	14.099	29.297	56.909	38.399	71.468	146.905	76.211	13.605	18.432	25.609	24.733	37.782	12.973	56.925	27.322	16.319	-0.0867293	0.765315	1.63549	GO:0008654	K00993
BraA03g012908E	140.169	89.931	132.652	305.272	316.504	333.357	311.302	385.374	461.433	107.401	126.83	153.111	103.612	155.499	142.282	372.892	214.793	204.957	-0.0639757	1.28004	0.62099	/	/
BraA10g046352E	11.693	10.455	16.984	16.356	9.586	15.356	8.179	8.533	13.943	8.54	12.593	16.447	6.421	7.754	5.99	12.352	15.041	11.293	0.086684	1.04766	-0.261522	/	/
BraA09g005930E	0.041	0.123	0.288	0.62	0.999	0.423	0.253	0.858	1.513	0.082	0.279	0.206	0.205	0.084	0.163	0.326	0.444	0.243	-0.308769	2.2107	1.44874	GO:0004672	/
BraA02g031352E	6.935	5.396	9.744	12.17	37.653	21.15	10.91	17.377	16.902	7.502	6.618	7.374	11.93	8.467	8.029	8.143	8.694	8.624	0.0681847	1.37433	0.90956	GO:0004672	/
BraA06g021897E	16.604	7.448	16.688	14.699	23.864	23.107	49.819	36.496	30.032	10.732	14.656	13.649	8.281	11.022	9.951	28.364	10.364	9.411	0.0908763	1.11681	1.34383	GO:0003700	K09419
BraA01g026108E	0.102	0	0.257	2.635	4.945	5.931	8.697	14.588	11.032	0	0.05	0.206	0.205	0	0.153	3.825	0.101	0.101	0.516208	5.27386	3.15927	GO:0006508	/
BraA04g042023E	6.166	12.634	0.374	10.966	21.67	21.302	30.63	10.034	22.592	6.669	2.032	16.493	58.393	43.209	25.585	36.239	49.028	41.24	-0.353859	-1.19656	-0.932779	GO:0005506	K20618
BraA07g036209E	12.186	12.251	11.729	15.004	31.526	11.035	15.122	39.988	24.772	10.419	13.551	14.184	8.766	7.726	6.317	15.627	14.698	13.013	-0.0468546	1.38104	0.972291	/	K02552
BraA09g000027E	11.344	11.235	15.711	13.837	16.142	10.932	9.123	18.518	19.032	10.311	13.677	13.581	7.131	6.801	5.917	12.776	14.471	12.642	0.0558269	1.07162	0.309293	GO:0004672	/
BraA03g010001E	6.423	5.959	3.412	3.897	4.521	3.752	3.012	6.13	5.809	7.717	3.992	5.775	10.65	7.06	13.161	6.295	6.465	5.778	-0.110495	-1.3143	-0.22888	/	/
BraA09g004648E	31.916	20.246	6.312	20.848	23.823	16.341	13.321	30.537	15.504	20.704	14.393	30.931	41.653	57.083	39.867	25.164	34.804	42.671	-0.136632	-1.15549	-0.695658	GO:0005507	/
BraA02g028581E	1.846	0.198	2.855	2.399	1.142	2.049	0.34	0.83	2.023	1.452	2.317	1.996	0.198	0.54	0.723	2.764	2.215	1.239	-0.209356	1.94861	-0.893587	/	K06966
BraA10g045232E	7.563	8.273	5.7	7.756	7.704	6.316	13.021	13.478	20.73	8.007	5.579	9.663	14.776	8.863	9.17	7.821	3.765	9.206	-0.0762383	-0.569372	1.25577	GO:0006629	K20416
BraA07g037186E	0.357	0.357	0.18	0.602	3.031	1.11	3.376	13.802	3.4	0.119	0.407	0.24	0.358	0.244	0	2.019	0.294	0.294	0.250286	3.03906	3.07375	GO:0004672	K04733
BraA03g008986E	7.277	4.41	7.687	14.8	40.434	28.894	25.436	47.047	33.633	3.919	7.576	7.13	3.313	6.92	6.369	23.485	6.131	6.32	0.0850371	2.39733	1.63967	GO:0003677	/
BraA02g029351E	9.605	3.843	34.101	16.508	26.655	62.578	14.005	13.815	25.688	8.862	15.541	16.818	4.058	5.825	3.909	9.199	16.19	13.305	0.22773	2.9807	0.542178	/	K06617
BraA07g037690E	29.55	19.581	23.651	52.351	93.345	65.129	109.46	179.905	120.507	25.568	26.847	24.567	23.962	32.332	29.902	98.667	31.781	33.264	-0.0495188	1.33395	1.40285	GO:0005515	/
BraA04g043818E	5.647	3.557	5.267	8.246	23.009	13.438	13.52	19.977	15.272	4.397	4.221	5.417	6.497	6	5.77	10.786	7.097	6.76	0.0757324	1.3434	1.06605	GO:0008080	/
BraA04g043041E	29.137	30.622	33.869	35.998	17.875	27.942	27.878	19.359	27.652	29.621	30.958	32.893	24.707	25.589	21.777	44.811	73.615	46.574	0.0327151	0.189991	-1.0644	/	/
BraA09g006735E	55.866	65.335	41.663	23.217	35.07	21.234	8.996	31.899	33.936	43.923	44.63	70.711	166.504	123.687	93.084	93.933	112.361	103.777	0.0651392	-2.23488	-1.96591	/	K15283
BraA03g013183E	7.941	5.498	7.293	16.694	30.46	21.178	23.253	42.162	35.131	6.157	8.252	5.913	6.794	7.963	7.364	22.742	7.132	7.642	0.0582727	1.67061	1.4991	GO:0005515	/
BraA03g011540E	65.328	45.564	48.007	78.18	155.538	123.332	108.627	209.327	164.291	49.991	57.495	49.804	53.444	60.387	54.168	111.764	63.062	51.123	0.0461945	1.13336	1.1751	/	K18211
BraA01g024070E	1.117	1.739	2.126	1.757	10.625	2.96	8.453	16.552	12.352	2.238	1.455	0.877	2.862	0.89	1.981	3.718	2.209	1.843	0.154307	1.48733	2.3487	/	/
BraA10g046631E	4.221	4.44	6.661	8.913	8.411	8.107	8.998	18.474	17.543	4.972	5.639	5.67	3.982	5.184	3.529	9.017	8.161	8.385	-0.0590343	1.02648	0.899084	/	/
BraA09g001896E	0.912	0.963	0.408	0.614	0.722	0.21	2.09	1.435	0.643	1.521	0.643	0.46	1.573	2.231	2.475	1.062	0.551	1.403	-0.164413	-1.99241	0.54722	GO:0046983	/
BraA06g022553E	28.263	16.422	23.768	60.449	96.207	82.504	97.779	150.755	143.641	18.911	24.685	23.566	19.273	30.542	22.433	99.758	32.044	28.783	0.0579658	1.76737	1.36193	GO:0003677	/
BraA08g039769E	0.92	1.315	0.729	1.795	8.338	3.713	1.628	5.831	3.027	0.658	0.674	1.46	0.922	1.179	1.115	2.723	0.65	1.691	0.120306	2.17168	1.13825	GO:0006873	/
BraA09g004562E	0.532	0.32	1.18	1.959	10.391	3.355	10.457	18.419	9.398	0.81	0.874	0.58	0.79	0.611	0.828	6.547	1.074	1.707	-0.130542	2.88604	2.11635	GO:0004222	/
BraA06g021035E	3.285	2.457	4.212	3.288	3.11	2.167	7.942	6.827	4.706	3.023	3.792	3.817	2.029	3.162	2.581	4.24	2.657	2.955	-0.0663673	0.164087	1.06138	GO:0006855	K03327
BraA01g028473E	4.414	0	3.297	9.262	5.825	8.404	9.154	7.248	8.506	3.393	3.565	3.72	3.604	3.39	2.313	9.89	10.113	9.305	-0.437996	1.34799	-0.159144	/	/
BraA01g024045E	4.005	1.129	4.375	6.045	4.425	5.086	2.618	8.644	8.358	4.687	2.809	3.074	2.6	1.04	3.15	5.18	2.063	5.581	-0.120956	1.21332	0.695595	/	/
BraA08g041190E	3.349	0.838	2.224	8.311	15.973	12.701	22.222	30.761	17.159	1.981	2.453	1.536	2.365	4.211	3.492	12.309	3.235	4.745	0.133088	1.9226	1.86894	/	/
BraA09g007182E	8.8	4.855	4.025	4.04	1.798	1.651	0.177	2.393	1.297	7.608	5.793	5.689	14.714	15.622	12.516	2.129	18.172	5.118	-0.0755239	-2.51749	-2.60895	GO:0016020	/
BraA09g005665E	2.734	2.691	1.657	2.809	8.084	3.939	8.003	24.896	11.363	2.782	2.475	2.31	2.94	3.052	3.015	6.701	2.615	3.057	-0.0624156	0.774233	1.92867	/	/
BraA10g045260E	6.98	4.196	11.125	8.25	30.978	14.604	53.952	56.583	22.855	6.627	10.113	7.308	5.189	8.998	4.379	21.818	12.082	6.323	-0.0828021	1.59622	1.81078	GO:0006629	/
BraA10g046179E	21.503	10.646	0.441	5.698	4.152	4.735	0.31	7.237	1.158	7.642	2.458	17.172	13.708	21.975	17.161	4.806	14.17	12.858	0.300394	-1.83857	-1.74946	GO:0030410	K05953
BraA01g024493E	11.065	12.115	9.104	8.515	6.575	8.346	6.278	6.066	5.4	11.94	9.906	12.221	9.98	10.77	10.667	11.966	11.727	15.207	-0.0447108	-0.402066	-1.05304	/	/
BraA06g023391E	9.43	3.824	5.22	16.061	50.15	21.747	38.91	76.644	42.078	5.358	8.172	4.201	8.896	11.054	9.828	30.486	4.492	8.406	0.0899577	1.62051	1.94076	/	/
BraA04g044145E	36.248	24.612	33.928	74.145	88.014	80.573	98.652	137.11	125.251	31.565	31.917	30.703	29.386	36.817	32.435	93.732	37.696	36.076	0.0401083	1.33075	1.18321	/	/
BraA03g011615E	6.503	4.701	10.129	11.712	14.139	17.896	11.612	7.055	8.617	6.346	7.471	9.043	2.957	3.807	2.125	7.636	7.886	8.976	-0.0715511	2.33132	0.229904	/	K08233
BraA02g029180E	28.289	20.258	44.964	18.671	12.4	11.633	23.667	8.319	17.9	29.234	38.998	31.379	51.417	57.464	46.365	19.078	35.346	17.411	-0.064278	-1.84994	-0.45696	/	/
BraA01g024198E	7.105	8.895	9.334	11.174	3.471	5.943	3.386	3.751	5.849	8.986	7.588	8.596	7.662	8.472	8.163	9.415	8.378	11.389	0.0402642	-0.245122	-1.09403	/	/
BraA05g014066E	64.96	68.607	97.707	68.931	10.705	20.792	16.857	9.922	29.214	75.056	87.896	79.76	52.905	48.373	53.903	38.345	78.473	72.836	-0.0413416	-0.656988	-1.69073	GO:0009733	K14488
BraA03g012363E	127.637	159.638	247.353	117.162	23.91	23.283	29.039	31.374	67.564	138.399	261.508	169.97	127.368	143.81	138.396	101.512	171.569	176.919	-0.0671237	-1.34727	-1.74076	/	K01728
BraA07g037462E	4.282	2.655	5.276	2.755	4.614	6.051	0.73	3.417	4.719	2.232	5.737	3.714	2.128	1.994	1.694	2.049	3.707	5.707	0.0895354	1.24561	-0.287062	/	/
BraA08g041362E	0.846	0.188	1.483	6.333	7.753	13.925	13.408	16.273	19.324	0.815	0.551	0.948	0.471	1.123	0.437	13.849	1.61	1.673	0.15009	3.82236	1.58068	GO:0005337	K15014
BraA03g013208E	11.04	6.826	13.915	17.606	37.964	37.102	24.171	45.162	38.088	8.539	14.23	11.117	7.716	10.365	7.561	25.329	14.402	14.277	-0.0653402	1.90088	1.0728	GO:0008168	/
BraA03g007951E	1.494	1.461	1.773	2.115	2.266	6.331	6.884	5.472	2.952	1.429	1.654	1.541	1.464	4.184	3.775	2.353	1.575	1.643	0.0615776	0.22333	1.53778	GO:0004843	K05610
BraA06g020936E	42.614	16.17	40.351	19.026	17.287	11.103	38.337	27.764	18.612	45.085	33.054	28.653	15.818	50.121	57.011	26.971	21.084	22.655	-0.0755683	-1.34887	0.338479	GO:0006807	/
BraA07g036966E	15.122	7.926	11.444	40.271	105.367	69.816	112.223	200.32	131.791	9.671	12.614	11.61	13.052	19.349	13.999	82.05	15.234	13.245	0.0561204	2.26793	2.08302	GO:0004672	/
BraA02g029240E	0.318	0.33	0.569	0.44	1.14	0.805	0.583	1.31	1.184	0.354	0.483	0.333	0.26	0.41	0.258	0.599	0.535	0.361	0.084053	1.412	1.12303	GO:0005515	/
BraA10g047574E	8.265	3.115	5.988	4.922	12.514	10.678	11.388	12.419	12.582	5.441	6.303	6.969	4.935	3.306	3.726	7.629	7.834	5.321	-0.0759146	1.2805	0.886379	/	/
BraA01g026913E	9.388	7.705	9.266	13.964	50.64	27.047	58.273	91.131	46.347	10.228	11.003	6.584	11.13	10.826	11.521	32.689	11.45	12.03	-0.0477478	1.51314	1.88308	GO:0006855	K03327
BraA05g018364E	21.718	13.103	19.557	34.997	42.955	27.357	52.978	54.959	48.093	15.823	22.124	19.421	11.987	18.178	15.761	51.898	21.368	19.374	-0.0474854	1.2293	0.825863	GO:0004842	/
BraA09g005676E	4.814	2.987	5.893	8.256	14.154	15.095	7.606	16.695	18.639	4.454	4.166	6.027	5.679	4.995	5.895	5.292	7.349	6.09	-0.0663688	1.21932	1.27962	/	/
BraA03g011282E	316.891	259.563	40.861	137.908	200.19	161.157	48.644	150.182	77.659	170.036	116.966	279.166	174.266	285.247	152.93	185.144	306.41	399.151	0.163917	-0.258558	-1.59043	/	/
BraA09g007134E	6.715	4.702	8.369	20.443	35.344	25.597	36.253	54.981	44.196	4.706	7.19	7.53	3.215	11.009	4.341	35.503	8.432	9.549	0.0548107	2.17496	1.41477	GO:0006629	/
BraA09g001331E	5.888	3.308	8.734	23.688	45.147	33.269	43.514	70.818	61.032	4.159	6.853	6.348	5.375	8.098	6.756	37.598	9.128	10.215	0.0732749	2.38091	1.69699	/	/
BraA03g012533E	2.359	1.395	6.914	8.294	10.487	18.45	142.211	16.097	16.4	2.899	2.042	5.086	2.579	6.702	2.353	56.147	18.179	14.432	0.116422	1.71407	1.03166	GO:0003677	/
BraA09g000911E	0.043	0.043	0.175	0.263	8.624	1.62	1.791	18.046	7.995	0.043	0.17	0	0.174	0.222	0.087	1.17	0.257	0.129	0.309385	4.53129	4.2525	/	/
BraA03g012225E	0.164	0.164	0.192	0.248	0.639	0.226	0.169	3.178	0.953	0.137	0.32	0	0.246	0.279	0.381	0.272	0.135	0.081	0.209606	0.345503	3.24267	GO:0004672	/
BraA10g046535E	6.895	8.548	7.491	18.043	11.211	14.096	10.46	15.952	14.567	7.526	6.708	9.823	3.36	4.239	4.234	12.443	11.386	11.372	-0.0371473	1.88721	0.300711	GO:0000160	K12131
BraA03g013046E	25.49	17.687	22.345	40.994	73.728	57.711	64.293	113.13	91.551	19.843	23.811	21.772	17.596	26.738	20.651	60.641	22.064	21.728	0.0326982	1.45157	1.44261	/	/
BraA01g028338E	6.473	5.018	7.835	16.652	30.76	24.692	25.975	51.154	47.237	6.26	7.281	6.686	5.824	8.281	6.252	31.681	9.982	7.763	-0.0366511	1.86841	1.40639	GO:0005515	/
BraA08g039751E	1.733	1.301	1.484	1.869	3.738	3.473	2.831	3.427	3.21	1.186	1.806	1.807	1.245	1.48	1.152	3.345	2.199	1.915	-0.0569654	1.27116	0.421661	GO:0004672	/
BraA02g030478E	4.85	4.052	2.625	3.547	2.05	2.273	2.928	2.437	2.785	4.985	3.578	3.671	6.463	6.635	8.285	4.095	4.182	4.595	-0.0511833	-1.4292	-0.582544	GO:0003735	/
BraA05g015093E	6.607	5.562	6.679	8.42	25.12	10.488	25.942	63.83	29.495	6.382	6.589	5.916	5.572	13.276	5.777	19.343	7.174	6.192	0.0274758	0.894893	1.95313	/	/
BraA09g001717E	1.129	1.998	5.073	1.58	1.681	1.305	71.029	6.38	6.387	2.043	4.833	0.745	0.609	0.311	0.346	4.897	4.592	1.074	0.123891	1.87292	3.04746	GO:0006012	K18819
BraA03g013248E	43.957	17.858	8.383	6.174	60.196	18.467	12.046	8.77	8.062	28.892	28.871	7.585	47.38	32.695	34.969	18.422	24.743	19.025	0.139489	-0.362914	-1.02829	GO:0005507	/
BraA03g008635E	9.684	13.61	7.666	11.579	5.872	10.276	5.709	2.42	4.637	11.389	6.906	12.255	13.017	12.994	13.644	8.056	12.991	11.408	0.053799	-0.504769	-1.27397	/	/
BraA02g029059E	3.178	4.465	2.446	2.563	1.6	2.553	1.547	2.249	3.968	2.431	3.522	4.792	3.435	4.28	2.315	7.485	5.647	6.324	-0.0591897	-0.563468	-1.25342	GO:0016020	/
BraA06g021969E	12.923	9.503	10.469	22.911	49.111	33.331	57.75	100.928	72.17	10.196	11.429	11.329	11.847	20.014	11.136	53.831	14.099	9.488	0.028736	1.34009	1.65237	GO:0005516	/
BraA03g012748E	13.131	4.623	3.123	34.471	134.683	64.891	195.105	301.28	140.404	5.981	10.072	6.597	12.538	26.907	20.682	119.43	10.194	23.031	-0.0834985	2.02485	2.13713	GO:0004553	K08235
BraA08g039354E	2.041	1.128	1.759	5.186	11.135	6.791	10.721	21.114	14.439	1.586	1.652	1.978	1.13	1.926	1.714	5.925	1.062	1.488	-0.0507542	2.32541	2.52646	/	/
BraA06g020072E	23.968	24.349	25.618	29.632	98.802	42.494	87.936	166.183	76.241	27.987	27.119	21.586	23.566	37.707	24.539	58.938	24.794	25.636	-0.022358	1.05343	1.68071	/	K12450
BraA03g011453E	6.035	4.544	2.288	2.46	3.206	2.152	0.268	1.873	1.511	3.574	5.197	4.944	5.43	6.117	7.151	1.263	5.196	2.537	-0.0586507	-1.22583	-1.20473	/	/
BraA09g006852E	2.337	1.38	4.94	3.176	1.522	7.267	1.502	0.885	2.392	2.532	3.33	3.402	0.422	1.217	0.535	1.951	2.234	1.403	-0.0720408	2.48398	-0.157785	GO:0004040	/
BraA04g043653E	4.962	3.123	2.459	13.756	23.033	15.802	31.416	40.915	27.7	2.805	3.439	4.16	5.414	6.724	5.947	24.368	6.804	6.811	0.0528042	1.58078	1.4729	GO:0004672	/
BraA07g033639E	17.036	18.85	16.199	8.213	9.545	7.041	8.165	10.097	9.763	14.935	20.412	16.898	19.862	17.838	20.263	13.148	16.367	12.519	0.0254527	-1.19578	-0.50402	GO:0004970	K05387
BraA05g016946E	61.005	37.235	68.139	121.912	92.841	115.373	62.579	91.403	132.399	41.845	58.407	74.717	38.675	52.078	48.409	101.247	80.645	83.618	-0.0432746	1.26647	0.183991	GO:0005515	K14484
BraA10g046411E	3.184	2.336	3.391	5.028	27.399	9.428	18.799	71.297	25.16	3.157	3.287	2.876	2.552	2.765	3.084	18.736	3.776	3.961	-0.035017	2.387	2.21182	GO:0004435	K05857
BraA09g004063E	180.615	207.152	101.787	108.606	175.781	127.306	112.721	161.512	140.935	172.971	159.334	155.908	507.738	361.939	347.518	242.211	239.714	281.485	0.0376123	-1.52615	-0.79609	GO:0016491	K02641
BraA07g035100E	34.778	7.878	17.678	124.616	177.196	200.819	215.315	230.021	257.878	12.965	20.699	31.202	15.996	44.947	23.72	179.121	48.221	71.337	-0.0712311	2.60855	1.30523	/	K20858
BraA10g046553E	1.938	1.919	2.929	5.65	10.357	6.487	6.659	18.454	14.372	2.22	2.608	2.248	2.015	1.828	1.8	6.33	2.925	2.081	-0.032002	2.03763	1.88217	GO:0005515	K13459
BraA07g037508E	27.757	37.009	43.119	30.955	9.948	16.413	11.254	6.141	15.969	37.172	31.835	39.109	29.007	23.933	27.419	19.804	37.829	27.51	0.0269262	-0.494852	-1.28174	GO:0005515	/
BraA05g017854E	0.105	0.838	0	0.371	0.053	3.419	0.054	0.11	0.055	0.157	0.409	0.528	0.052	0.054	0	0.052	0.828	0	-0.183185	5.21315	-1.90803	GO:0016788	/
BraA04g044423E	8.144	5.257	6.882	6.641	11.83	6.971	19.405	16.602	11.067	8.417	6.312	6.522	8.057	7.86	9.328	9.494	5.505	7.019	-0.0347985	0.0528208	1.17437	GO:0008152	/
BraA07g034468E	2.21	1.131	1.242	2.442	1.675	2.61	4.877	4.046	7.07	2.418	1.255	1.245	3.605	1.58	1.947	2.103	1.219	2.237	-0.066019	-0.0695856	1.59516	GO:0016788	/
BraA10g047800E	19.227	13.715	25.265	25.314	21.461	32.274	16.299	13.645	23.8	17.493	22.82	20.458	11.687	14.347	12.714	17.024	22.6	15.593	-0.0339506	1.05316	0.0339715	/	/
BraA01g028345E	1.498	1.342	1.797	2.77	5.363	4.451	4.195	10.289	8.577	1.657	1.547	1.627	1.444	2.31	1.665	5.569	2.2	1.92	-0.0287831	1.26051	1.33068	GO:0005515	/
BraA10g046552E	10.461	10.442	12.688	21.13	40.406	27.913	37.723	76.094	48.559	11.599	10.553	11.714	8.069	8.744	8.602	30.571	11.882	11.259	0.018843	1.8601	1.67799	GO:0004672	/
BraA10g046544E	43.709	38.245	50.683	69.939	81.823	83.698	67.379	94.769	101.286	34.349	51.992	51.712	29.576	31.132	30.737	72.782	75.023	71.408	-0.0289898	1.39573	0.34502	GO:0003677	/
BraA09g004549E	4.043	4.862	5.214	7.218	5.301	5.72	7.232	7.81	9.589	3.703	5.138	5.295	2.485	2.923	2.459	8.329	7.284	6.483	0.0270789	1.23067	0.23247	GO:0005515	/
BraA10g046988E	1.342	2.684	0.676	0.565	0.683	0.695	0.115	0.469	0.592	0.448	1.201	2.821	4.258	4.926	3.011	1.116	4.863	5.753	0.1069	-2.62441	-3.23541	GO:0006950	/
BraA06g020308E	0.494	0.045	0.272	2.907	12.999	6.939	3.986	5.66	8.132	0.27	0.395	0.091	0.18	0.322	0.717	5.203	0.977	0.978	0.130456	4.2953	1.37826	GO:0005215	/
BraA02g029109E	4.656	4.891	2.844	14.977	14.883	14.84	0.54	14.419	14.015	5.39	2.473	4.464	4.958	4.025	4.092	0.697	1.899	4.003	0.0437959	1.79814	2.2288	GO:0052861	K01180
BraA02g028591E	0.514	0	0.259	3.445	10.022	4.332	6.965	24.703	14.019	0.129	0.126	0.454	0.193	0.461	0.641	6.419	0.381	0.509	0.163268	3.838	2.72267	/	/
BraA02g030147E	1.062	0.658	1.682	1.279	0.67	1.966	0.235	0.637	1.151	1.013	1.062	1.276	0.456	0.518	0.353	0.631	1.625	0.851	0.0501557	1.57724	-0.54063	GO:0000145	K19986
BraA08g041057E	4.621	3.302	5.38	2.791	1.589	2.363	2.105	1.449	2.794	4.146	4.22	4.905	4.149	5.718	4.788	2.636	3.5	2.553	0.033818	-1.10389	-0.380325	/	/
BraA04g043471E	2.547	2.092	3.255	7.917	6.699	6.776	9.96	9.896	9.535	2.55	2.45	2.877	2.438	2.765	2.578	7.551	5.561	4.138	0.0332024	1.48091	0.845323	/	/
BraA07g035851E	0.744	0.651	0.843	0.611	0.332	0.53	0.336	0.634	0.344	0.279	1.135	0.985	0.047	0.095	0	0.696	0.551	0.506	-0.0744204	3.39635	-0.331611	GO:0009765	K08908
BraA03g007995E	0.296	0.165	0.63	0.399	0.402	0.307	1.662	1.07	0.731	0.263	0.546	0.365	0.33	0.573	0.426	0.427	0.228	0.325	-0.0844983	-0.236061	1.89888	GO:0009058	K02291
BraA08g040269E	9.734	3.732	6.839	7.034	28.634	15.758	12.993	48.38	22.98	6.488	8.192	6.652	8.968	8.191	6.295	13.525	9.178	5.94	-0.0400426	1.19273	1.6511	/	/
BraA03g013158E	0.857	2.104	1.844	3.545	15.516	8.357	7.555	35.901	17.315	1.521	2.168	1.376	1.718	1.078	1.049	5.522	2.426	2.66	-0.049304	2.8946	2.61068	GO:0004672	/
BraA05g014468E	9.8	7.703	7.656	10.515	9.117	17.619	29.039	10.602	13.864	8.16	5.176	13.119	6.113	9.17	5.635	7.636	7.463	8.064	-0.0379318	0.859151	1.27751	GO:0003677	/
BraA02g029841E	4.222	3.587	1.806	0.614	0.295	0.15	0.686	4.947	4.009	5.298	2.768	2.13	28.311	16.68	18.081	16.568	1.829	11.102	-0.0479595	-5.88886	-1.53038	/	K00928
BraA09g000846E	6.165	6.21	5.554	7.154	3.14	5.039	3.001	3.235	5.743	4.52	7.123	6.352	5.264	7.562	4.892	8.624	11.243	9.064	0.0242945	-0.203651	-1.19817	/	/
BraA09g005989E	85.51	33.47	80.288	90.892	123.311	149.237	60.291	104.672	112.75	40.128	70.314	87.574	38.236	73.136	37.705	82.976	70.48	74.442	0.0384973	1.3219	0.365205	/	/
BraA09g000086E	8.419	7.806	10.987	11.926	32.377	21.4	15.605	41.385	28.88	8.269	10.205	9.647	8.894	9.281	8.737	18.676	12.765	10.16	-0.0186654	1.3407	1.13171	/	/
BraA10g045735E	0.32	0.454	0.081	0.216	0.218	0.055	0.138	0.533	0.198	0.588	0.104	0.243	2.516	2.572	2.397	0.48	1.294	0.634	-0.0872968	-3.90997	-1.37342	GO:0004672	/
BraA10g046034E	1.303	0.852	1.111	2.432	1.583	1.766	2.482	3.472	3.872	0.953	1.468	1.012	0.452	0.719	0.7	2.101	1.585	0.893	-0.043327	1.64472	1.17837	/	/
BraA02g028789E	26.794	18.892	30.516	60.271	88.133	76.115	79.424	75.057	74.652	23.809	21.071	31.708	40.276	45.258	26.56	59.561	49.937	34.339	0.0237193	1.0374	0.748029	GO:0003677	/
BraA01g026537E	138.566	106.359	235.19	164.015	141.802	270.096	105.268	81.641	117.485	133.079	182.262	183.532	78.597	87.284	69.627	104.932	180.092	134.589	-0.0284092	1.31629	-0.38711	GO:0005515	K15718
BraA03g012601E	17.473	8.078	19.648	41.968	48.347	72.779	56.656	39.805	49.73	12.813	15.681	18.681	14.765	22.257	9.089	26.304	20.958	28.925	-0.032301	1.85352	1.01368	/	/
BraA06g022544E	14.953	6.726	6.682	14.997	8.139	18.529	21.242	9.272	15.73	7.969	8.951	12.808	6.737	5.715	5.472	15.198	26.403	17.839	-0.033371	1.23099	-0.290503	GO:0000160	K12130
BraA05g013946E	20.428	26.643	14.055	18.971	16.217	15.934	11.333	17.949	23.414	24.058	20.956	18.538	73.031	44.9	59.79	36.977	27.252	34.738	-0.0231289	-1.77775	-0.832805	/	/
BraA06g019964E	2.094	4.85	0.666	1.365	1.684	1.627	1.762	1.012	0.962	1.627	2.744	3.725	6.488	5.589	3.242	5.582	3.758	4.225	-0.0560422	-1.68444	-1.78601	GO:0005452	/
BraA07g034628E	1.306	0.617	1.645	2.164	2.809	3.121	3.967	2.247	2.496	0.908	1.098	1.538	1.163	1.375	0.724	2.137	1.219	1.149	0.0390646	1.34318	1.02261	GO:0005515	/
BraA09g001541E	35.913	51.354	4.438	14.645	12.853	18.68	14.392	11.281	7.489	34.019	20.471	35.097	53.383	73.525	85.546	20.191	70.866	43.662	0.0721764	-2.17488	-1.93637	/	K01674
BraA09g005739E	22.763	28.06	41.413	19.169	2.963	6.087	4.702	2.319	7.902	24.079	39.656	31.635	14.264	15.931	16.789	7.984	25.928	22.165	-0.0220573	-0.762799	-1.8402	GO:0008270	K16281
BraA04g044234E	7.177	3.796	5.549	14.908	41.087	33.284	22.056	47.185	36.031	4.559	6.607	5.974	6.606	6.265	6.336	20.109	10.031	7.746	-0.0225917	2.2694	1.55577	/	/
BraA07g037124E	0.075	0.013	0.063	0.145	0.357	0.175	0.232	0.256	0.265	0.05	0.085	0.025	0.081	0.115	0.044	0.112	0.105	0.056	-0.0691448	1.54163	1.54088	GO:0043531	/
BraA05g017661E	7.113	4.553	5.895	10.826	5.065	14.467	4.379	3.212	4.736	3.791	6.125	7.719	2.031	3.017	2.021	3.779	8.468	6.585	0.0245209	2.11656	-0.534449	/	/
BraA07g036829E	7.184	8.444	11.127	12.075	17.107	22.523	17.416	37.987	26.136	5.574	10.612	10.602	3.24	8.097	4.03	19.183	7.989	10.841	0.025316	1.7891	1.18414	/	/
BraA03g012551E	80.397	39.489	9.862	43.941	27.146	22.827	1.075	45.431	21.296	49.231	24.875	53.874	118.082	170.32	166.458	34.518	106.794	95.429	0.0606479	-2.266	-1.69535	GO:0008168	/
BraA03g008106E	8.383	8.445	0.205	1.701	1.655	1.714	4.219	3.106	6.202	2.962	8.641	4.772	23.286	10.7	5.526	33.446	30.509	32.149	0.0899948	-2.94426	-2.75871	GO:0008271	K17471
BraA10g047920E	20.719	17.7	23.485	17.451	10.979	16.65	9.557	7.623	13.739	17.628	23.668	21.315	20.041	20.815	20.447	15.993	28.07	23.068	0.012641	-0.428413	-1.04434	GO:0004332	K01623
BraA01g024025E	2.19	1.685	2.969	4.725	4.032	3.666	8.079	5.525	6.15	2.361	2.097	2.422	1.688	2.718	1.68	5.254	3.121	2.875	0.0224545	1.05153	0.884361	GO:0003677	/
BraA01g026618E	0.337	0.286	0.154	0.65	0.218	0.55	0.369	0.418	0.8	0.01	0.439	0.309	0.194	0.115	0.041	0.571	1.12	0.586	0.0631932	2.01589	-0.446677	/	/
BraA07g035424E	3.298	3.42	3.778	3.076	7.103	4.027	6.634	14.022	6.614	3.83	3.353	3.617	3.456	3.888	3.379	5.066	3.543	3.025	-0.0102211	0.454456	1.31855	GO:0016747	/
BraA02g028943E	0.695	0.442	1.018	1.213	5.724	4.123	0.261	4.242	2.472	0.948	0.74	0.573	0.696	0.518	0.189	1.008	0.749	0.375	-0.0409211	3.03685	1.804	/	/
BraA10g046508E	12.102	9.073	16.54	23.405	39.811	27.614	34.987	30.881	31.354	7.872	17.791	13.327	9.218	13.689	8.968	27.315	22.451	17.644	-0.0220407	1.55179	0.604062	GO:0000145	/
BraA09g002108E	5.283	4.83	5.296	5.393	2.644	4.089	3.562	2.902	4.368	5.172	4.931	5.553	5.788	5.319	5.19	9.445	7.505	7.218	0.00824375	-0.419538	-1.08591	/	/
BraA08g039763E	30.348	16.486	7.631	40.618	14.337	65.825	13.357	5.426	21.774	15.218	11.796	30.109	6.36	6.659	5.818	30.908	56.455	38.639	-0.0306402	2.69354	-1.57014	GO:0003700	K09286
BraA06g019215E	1.436	2.749	3.209	0.821	0.382	0.518	0.193	0.131	0.727	2.564	1.83	3.277	1.877	5.247	1.682	0.997	4.012	5.253	-0.0224988	-2.3461	-3.21803	/	K19040
BraA05g018379E	3.47	3.333	1.608	5.543	9.615	24.529	1.289	7.795	9.769	2.363	3.864	2.241	1.808	6.044	1.661	1.108	2.058	1.167	0.0211235	2.10393	2.20566	/	/
BraA07g034610E	34.227	37.928	24.313	25.212	39.224	29.174	21.533	29.908	28.976	35.417	32.563	30.092	79.798	59.679	61.552	44.977	50.092	48.184	0.00894061	-1.06543	-0.751472	GO:0004345	K00036
BraA10g046978E	70.885	47.211	80.066	39.495	26.49	25.713	20.229	11.363	24.097	51.376	86.461	62.475	104.354	145.414	99.853	24.074	66.372	27.218	0.0121262	-1.9185	-1.00615	/	/
BraA02g029572E	2.027	0.614	4.578	5.588	11.699	5.601	23.504	30.492	20.929	2.398	3.239	1.549	2.093	2.517	2.45	23.786	3.703	4.072	0.0299419	1.74349	1.31989	/	K07025
BraA06g019332E	5.743	6.615	5.177	3.973	3.349	2.82	4.716	2.578	2.919	8.777	4.76	4.576	11.587	9.098	13.302	4.036	4.706	7.066	-0.0129179	-1.72363	-0.554629	GO:0004650	/
BraA04g042837E	18.242	19.627	22.33	53.641	22.708	55.031	1.938	13.54	47.096	19.392	18.019	24.39	12.55	16.167	8.035	6.959	13.492	20.735	-0.00707873	1.84395	0.673437	GO:0006629	/
BraA09g005940E	2.907	2.3	2.759	5.811	22.627	16.503	9.068	29.561	20.538	2.234	3.5	2.456	4.201	4.053	4.45	10.124	4.478	3.68	-0.0115175	1.88254	1.77875	/	/
BraA03g009726E	29.52	30.953	66.377	46.174	22.933	20.62	33.752	31.157	42.558	28.068	59.585	42.469	11.134	19.293	12.852	43.622	48.877	43.529	-0.0129923	1.05299	-0.264727	GO:0000287	K12467
BraA06g023678E	0.669	0.616	1.887	3.897	7.989	0.86	9.939	9.131	7.28	0.402	2.405	0.459	0.858	3.51	7.714	2.351	3.889	4.635	-0.0254976	0.133009	1.35941	/	/
BraA04g042398E	18.659	9.87	12.532	51.501	69.188	60.87	53.359	94.969	91.29	14.316	14.697	12.734	19.165	21.462	25.061	65.977	19.186	23.663	0.00834699	1.50286	1.21342	GO:0004672	/
BraA02g033160E	33.252	24.036	33.499	92.599	104.169	118.431	166.955	213.363	180.238	27.423	27.782	38.018	32.36	39.683	49.36	115.793	72.671	50.021	-0.00702331	1.40916	1.31103	GO:0045087	/
BraA07g036963E	2.712	2.4	1.997	8.542	35.596	13.892	4.627	46.916	33.394	1.88	2.649	2.684	3.815	2.458	2.757	8.434	4.691	2.993	0.0100499	2.74597	2.48657	/	/
BraA06g019064E	1.832	2.132	1.13	1.587	0.952	1.278	1.157	1.53	1.662	1.909	1.643	1.698	2.51	2.719	2.87	1.866	2.291	2.848	-0.0101564	-1.06824	-0.608371	/	/
BraA09g006301E	12.749	5.781	17.065	50.576	202.94	99.805	189.126	413.595	231.29	12.057	13.183	10.817	16.357	24.045	22.744	159.097	19.447	19.861	0.00956804	2.54832	2.14907	/	K13464
BraA09g006514E	3.637	1.732	0.96	13.657	20.288	13.461	43.5	30.993	30.516	2.687	1.691	2.184	4.078	5.855	4.663	25.757	6.248	9.939	-0.0147173	1.73647	1.3922	/	/
BraA01g023799E	70.796	27.942	72.062	86.156	73.944	135.592	41.184	30.143	67.895	41.861	63.753	69.711	41.949	47.864	27.953	39.509	103.768	64.327	-0.00866465	1.3525	-0.503166	GO:0004672	/
BraA07g036864E	236.768	227.2	118.092	92.255	173.81	105.971	185.278	287.129	239.931	199.208	208.491	185.466	405.099	355.923	345.818	371.766	353.781	383.188	0.00625083	-1.52974	-0.554956	GO:0008152	/
BraA09g005464E	8.059	6.352	8.504	14.028	24.351	16.722	19.604	38.887	29.709	8.161	7.424	7.887	7.786	8.555	8.936	19.229	8.691	9.078	-0.00362633	1.16666	1.3343	/	K01408
BraA09g000119E	94.248	64.691	105.47	160.031	199.128	163.067	150.738	354.299	303.254	84.255	98.961	87.47	75.342	66.759	63.022	126.864	122.538	68.081	-0.0044786	1.37947	1.43264	GO:0003677	/
BraA08g040665E	14.66	12.342	18.1	40.782	100.978	56.538	93.286	175.412	114.388	14.975	16.495	14.662	14.374	18.561	20.883	76.284	18.365	18.679	-0.00332202	1.93499	1.83532	/	K13464
BraA03g007979E	22.462	14.156	21.61	37.641	58.063	48.014	70.963	98.85	73.517	19.003	18.537	21.817	18.514	24.798	20.273	62.613	25.921	24.671	0.0034825	1.21544	1.18187	GO:0016020	/
BraA09g002717E	0.083	0.166	0.475	0.42	1.779	1.264	1.115	3.084	0.997	0.139	0.46	0.14	0.306	0.114	0.249	1.411	0.521	0.411	-0.0117933	2.43054	1.24031	GO:0004672	/
BraA08g040273E	2.681	1.874	2.294	5.57	14.404	7.879	12.844	26.408	15.12	2.464	2.08	2.446	1.987	2.596	2.344	12.282	2.287	2.399	0.00283232	2.05995	1.75925	GO:0003700	/
BraA08g041170E	0.873	0.994	1.456	2.771	12.028	5.494	6.991	15.745	9.978	0.965	1.647	0.76	0.845	0.771	0.961	4.089	1.28	1.222	0.0043454	3.04074	2.39316	/	/
BraA07g035469E	78.153	47.718	62.09	157.71	238.151	201.981	226.089	319.856	262.458	52.119	71.983	67.646	65.994	93.327	83.281	185.884	85.819	85.866	0.00181184	1.34055	1.25463	GO:0003677	/
BraA06g023345E	10.512	9.179	0.857	8.109	5.323	4.093	2.068	6.442	1.929	5.536	2.848	12.693	11.204	14.008	9.271	6.733	24.925	17.556	0.00386262	-0.965411	-2.13209	/	/
BraA02g030246E	4.394	4.524	7.02	10.011	23.482	17.04	11.925	48.575	34.226	5.038	5.809	5.394	7.367	5.631	5.308	16.343	7.347	6.196	0.000902953	1.51279	1.74964	GO:0004672	/
BraA07g034877E	0.858	0.572	2.018	2.314	2.04	4.053	0.492	1.001	3.533	0.955	0.931	1.636	0.956	0.684	0.38	0.19	1.603	0.566	-0.00259863	2.08133	1.16339	/	/
BraA08g039337E	70.669	49.389	105.477	160.53	385.104	283.953	79.19	206.086	209.402	69.466	77.418	83.036	66.205	59.466	55.045	81.124	108.512	102.397	0.000499398	2.24798	0.845719	GO:0005506	/
BraA04g041417E	2.458	1.818	4.486	3.134	0.399	0.148	0.074	0.075	0.339	1.534	4.245	3.128	0.428	1.606	0.497	0.818	2.782	1.833	0.000212188	0.493767	-3.4076	/	/
BraA02g032060E	1.379	0.69	12.595	3.09	2.692	14.506	4.694	0.796	3.576	2.784	7.407	4.638	1.704	1.907	1.123	2.294	9.291	2.684	-0.000327571	2.13294	-0.587466	GO:0005215	K14445
BraA07g035493E	0.025	0.025	1.967	0.95	0.277	0.717	0.535	0.467	0.942	0.025	0.072	0	0.025	0.025	0	0.099	0.171	0.22	4.3815	5.28259	2.06103	GO:0005524	K13525
BraA02g032393E	3.565	1.131	66.92	14.065	6.997	30.368	45.564	5.02	24.57	11.404	13.756	22.462	2.004	2.316	1.647	10.241	33.174	24.52	0.607014	3.1285	0.21052	GO:0009507	/
BraA08g040657E	0	0.072	8.287	1.229	6.996	1.779	0.59	12.164	11.659	0.716	0	0.217	0.43	0.073	0.285	0.357	0.071	2.902	3.18986	3.73047	2.96641	/	/
BraA08g040656E	0.321	0.193	23.384	2.73	18.734	4.931	1.725	33.342	29.33	1.738	0.063	1.168	1.998	0.395	0.898	1.348	0.191	5.981	3.03367	3.07256	3.19064	/	/
BraA07g036427E	1.339	0.583	45.523	5.829	7.178	16.657	3.724	1.589	9.984	2.449	3.299	4.407	2.042	1.671	0.871	2.965	3.856	3.112	2.24124	2.72716	0.68349	GO:0003677	/
BraA06g020613E	4.496	0.06	0.21	0.08	0.121	0.062	0.215	0.042	0.042	0.07	0.039	0.05	0.338	0.214	0.257	0.069	0.098	0.049	4.95498	-1.5898	0.534984	/	/
BraA03g009736E	1.676	1.258	68.356	4.958	19.127	9.599	3.761	5.455	11.222	2.518	3.193	2.157	4.2	2.018	2.173	3.347	5.013	4.645	3.19594	2.06229	0.725999	GO:0006629	/
BraA04g044167E	2.248	1.472	24.913	1.364	5.413	5.973	1.434	0.729	0.779	1.883	2.435	4.331	1.229	1.424	1.386	0.938	1.899	0.728	1.74684	1.71557	-0.200228	GO:0016020	/
BraA09g005654E	0.791	0.507	116.023	0.736	0.935	1.082	1.241	0.731	1.172	1.046	1.669	2.236	2.188	2.529	3.062	3.38	0.907	1.253	4.58271	-1.46806	-0.752995	GO:0004553	K01188
BraA06g021700E	0.228	0.057	0	0.462	1.222	0.178	1.061	2.338	1.27	0.057	0.056	0.058	0.057	0.176	0.057	0.399	0.056	0	/	2.73976	/	GO:0003676	/
BraA01g025571E	0.126	0.126	0.032	0	1.252	0	0.065	5.029	2.936	0	0	0	0.032	0	0.094	0.157	0	0.031	/	3.42046	/	/	/
BraA04g043195E	0	0	0.488	0.294	12.233	0.502	1.598	4.473	1.947	0.097	0	0.098	0.194	0.198	0.097	0.387	0.191	0.096	/	4.83005	/	/	/
BraA01g028074E	0.023	0	0.046	0.116	0.513	0.119	0.283	0.817	0.436	0.069	0.022	0.046	0.046	0.023	0	0	0.113	0.068	/	3.49003	/	/	K10706
BraA09g006905E	0.188	0.282	0.095	0	4.109	0.194	0.097	4.333	3.376	0	0.183	0.189	0.094	0	0	0.187	0	0	/	5.503	/	/	/
BraA07g037630E	0	0.024	0	0.025	1.097	0.127	0.076	0.745	0.44	0	0	0.025	0.074	0	0.024	0	0.024	0.024	/	3.75424	/	GO:0004672	/
BraA03g010079E	0.252	0.05	0	0.102	0.718	0	0.416	1.48	0.426	0.05	0	0	0.151	0.155	0.1	0.101	0	0	/	1.08643	/	GO:0004672	/
BraA09g005651E	0	0	0.056	0	1.671	0.058	0.269	0.274	0.118	0.019	0	0.019	0.019	0.038	0	0.019	0	0	/	5.02626	/	GO:0004553	K01188
BraA02g028515E	0.024	0.049	0.024	0.369	2.773	0.907	1.479	4.796	2.264	0.024	0.024	0	0.049	0.025	0.024	0.582	0.096	0.337	/	5.44097	/	GO:0004672	/
BraA10g047339E	0.164	0	0.024	0.094	1.57	0.315	0.241	4.536	2.077	0	0	0.024	0.023	0.048	0	0.256	0.023	0.046	/	4.88367	/	GO:0005515	/
BraA09g004179E	0.281	0.07	0.071	1.564	8.526	3.791	10.158	27.538	12.506	0.07	0	0.142	0.211	0.216	0.281	6.6	0.07	0.07	/	4.35949	/	/	/
BraA10g046329E	54.44	15.294	22.439	156.802	363.83	220.602	293.148	541.396	311.591	11.151	21.281	18.918	22.46	101.281	42.703	202.875	27.897	30.255	0.87661	2.20646	2.21098	GO:0004553	K14504
BraA02g028578E	0.411	0.082	0.083	1.579	3.349	1.448	8.901	12.939	7.306	0	0	0	0.247	0.421	0.902	6.645	0.162	0.325	/	2.07011	/	/	/
BraA02g032911E	0.036	0.036	0.036	0.036	1.748	0.074	0	0.038	0.151	0	0.035	0	0.036	0	0	0	0	0	/	5.67992	/	GO:0004506	K00511
BraA08g039852E	0.242	0	0.049	3.285	9.288	3.921	7.454	13.439	10.573	0	0.047	0.049	0	0.795	0.193	19.074	0.383	1.056	/	4.12116	/	GO:0003700	K09286
BraA04g043149E	0.039	0	0	0.82	6.727	1.881	5.338	29.431	8.134	0	0	0	0.116	0.356	0	5.359	0	0.076	/	4.39637	/	GO:0046983	/
BraA03g010233E	0.206	0	0	0.835	0.771	0.927	1.348	1.517	2.84	0.069	0.134	0.069	0.138	0.282	0.069	2.747	0.204	0.885	/	2.4032	/	/	/
BraA09g006327E	0	0.217	0.073	0.439	2.506	1.2	0.299	3.342	2.144	0.072	0.071	0.073	0	0.074	0	0.433	0	0.072	/	5.7897	/	/	/
BraA03g009276E	0.112	0	0	1.699	3.024	0.697	6.008	5.761	4.327	0	0.055	0	0	0	0	3.634	0	0.055	/	7.48365	/	GO:0003700	K09286
BraA03g009200E	0.298	0	0.075	0.753	4.857	1.776	1.23	9.853	3.154	0	0	0.15	0.075	0.076	0.149	1.859	0.147	0.147	/	4.69252	/	/	/
BraA05g015585E	0.047	0.047	0.048	0.191	1.538	0.783	0.584	2.328	0.999	0.047	0.046	0.143	0.047	0	0.188	0.612	0.093	0.14	/	3.4836	/	/	/
BraA08g039390E	0.038	0.114	0.038	0.038	0.039	0.118	1.056	0.557	0.803	0.038	0	0.038	1.026	0.35	0.34	0.795	0.525	0.976	/	-3.1216	/	/	/
BraA03g008192E	0.218	0.055	0	3.919	16.518	5.432	15.432	43.44	19.415	0	0.053	0	0.109	0.336	0.272	14.606	0.108	0.216	/	5.24084	/	GO:0003700	/
